# Supplementary material for: miRNA signatures associated with vulnerability to food addiction in mice and humans
Source: PubMed Central journal article supplement (PMC9106358; doi:10.1172/jci156281), 2022-05-16
Supplement: jci-132-156281-s205.pdf [file jci-132-156281-s205.pdf]

Supplemental Material for

**MicroRNAs signatures associated with vulnerability to food addiction in mice and humans**

**Authors:** Alejandra García-Blanco<sup>1,†</sup>, Laura Domingo-Rodriguez<sup>1,†</sup>, Judit Cabana-Domínguez<sup>2,3,4,5,†</sup>, Noèlia Fernàndez-Castillo<sup>2,3,4,5,†</sup>, Laura Pineda-Cirera<sup>2,3,4,5</sup>, Jordi Mayneris-Perxachs<sup>6,7,8</sup>, Aurelijus Burokas<sup>1,9</sup>, Jose Espinosa-Carrasco<sup>10</sup>, Silvia Arboleya<sup>11,12,‡</sup>, Jessica Latorre<sup>6,7,8</sup>, Catherine Stanton<sup>11,12</sup>, Bru Cormand<sup>2,3,4,5</sup>, Jose Manuel Fernández-Real<sup>6,7,8,13,\*</sup>, Elena Martín-García<sup>1,14,A,\*</sup>, Rafael Maldonado<sup>1,14,A,\*</sup>

\*Corresponding author. Email: [rafael.maldonado@upf.edu](mailto:rafael.maldonado@upf.edu)  
[elena.martin@upf.edu](mailto:elena.martin@upf.edu)  
[jmfreal@idibgi.org](mailto:jmfreal@idibgi.org)

## Methods and materials

### Animals

Experiments were performed in male JAX™ C57BL/6J wild-type (WT) mice, aged 8 weeks, purchased from Charles River (Lyon, France). Mice were housed and maintained individually in controlled laboratory conditions, the temperature at  $21 \pm 1^\circ\text{C}$  and humidity at  $55 \pm 10\%$ , and food and water were available ad libitum during the entire experiment. Mice were tested during the dark phase of a reverse light cycle (lights off at 8.00 a.m and on at 8.00 p.m). Animal procedures were conducted in strict accordance with the guidelines of the European Communities Council Directive 2010/63/E.U. and approved by the local ethical committee (Comitè Ètic d'Experimentació Animal-Parc de Recerca Biomèdica de Barcelona, CEEA-PRBB, agreement N°9213). In agreement, maximal efforts were made to reduce the suffering and the number of mice used.

### Experimental design

*Mouse food addiction protocol.* Mice were trained to obtain chocolate-flavored pellets (n=51) or standard pellets (n=7) in operant boxes during 98 sessions in 1 h-daily self-administration sessions. The operant boxes used and a daily self-administration session of the food addiction protocol was accurately described in (1, 2). Briefly, operant responding maintained by food was performed in mouse operant chambers (Model ENV-307A-CT, Med Associates, Georgia, VT, USA) equipped with two retractable levers, one randomly selected as the active lever and the other as the inactive. The grid floor is made of parallel metal bars and conducts the electric foot shock when it is scheduled.

Pressing on the active lever resulted in a pellet delivery together with a stimulus-light (associated-cue), located above the active lever, while pressing on the inactive lever had no consequences. The chambers were made of aluminum and acrylic and were housed in sound- and light-attenuated boxes equipped with fans to provide ventilation and white noise. A food dispenser equidistant between the two levers permitted delivery of food pellets when required. Mice were under fixed-ratio 1 (FR1) during six sessions, followed by 92 sessions under FR5. During this long operant conditioning maintained by food, the food addiction-like behavior was evaluated in 3 different time-points, an early period (1-14 sessions), a medium period (42-55 sessions), and a late period (82-92 sessions) to study the evolution of the addictive phenotype. The three food addiction-like criteria assessed were (1) persistence of response, (2) motivation, and (3) compulsive-like behavior, these criteria summarized the main features of the human food addiction diagnosis through the Yale Food Addiction Scale (YFAS 2.0) based on the 5th edition of the diagnostic and statistical manual of mental disorders (DSM-5) for substance use disorders. The three behavioral tests performed to evaluate these three addiction-like criteria were performed as described in detail (1–3).

At the end of the late period, we categorized animals in two subpopulations, and mice were classified as food-addicted or non-addicted depending on the number of addiction-like criteria achieved (1–3). Mice that achieved 2 or 3 addiction-like criteria were considered addicted animals, and mice with 0 or 1 addiction-like criteria were considered non-addicted animals.

We also evaluated 4 additional phenotypic traits during the food addiction protocol considered as factors of vulnerability to addiction to have a complete addictive-like

behavioral characterization (Figure S1B). We assessed impulsivity, cognitive flexibility, appetitive cue reactivity, and aversive cue reactivity (2, 4).

1. Impulsivity: The motor impulsivity, defined as the inability to stop a response once it is initiated (5), was measured considering the non-reinforced active responses during the time-out periods after each pellet delivery. A time-out period of 10 s was established after each pellet delivery, where the cue light was off, and no reinforcer was provided after responding on the active lever. In addition, the mean of the total active responses in the time-out periods of the 3 consecutive days before the progressive ratio test were considered.
2. Cognitive flexibility: The cognitive flexibility was measured in a reversal test. The reversal test was a regular training self-administration session, but the active and the inactive levers were reversed compared to the previous basal session. A mouse was considered to discriminate when at least 75% of the responses were on the same lever. The total number of inactive lever-presses in the basal session active responses was considered a measure of cognitive inflexibility.
3. Appetitive cue reactivity: The appetitive cue reactivity was measured with the cue-induced food-seeking test. The self-administration session lasted 90 min during this test and was divided into 2 periods: 60 min (extinction) + 30 min (cue-induced food-seeking) consecutive in 1 session. In the first 60 min extinction period, all lever-presses were not reinforced (active and inactive lever-presses had no scheduled consequences). In the second 30 min cue-induced food-seeking period, the white cue light, associated with pellet delivery during a regular self-administration session, was illuminated contingently according to an FR5 without pellet delivery. This period was initiated with the presentation of

the cue-light twice non-contingently and for 4 s. The increment of the active responses during the first 15 min of the second period, when the cue-light was presented, was considered a measure of appetitive cue reactivity. High active responses mean a high reactivity to the context (cue-light).

4. Aversive cue reactivity: The aversive cue reactivity was measured the day after the shock test using the shock context and not introducing the shock. In this test, mice were placed in the self-administration chamber for 50 min with the same grid floor used during the shock test. The mentioned grid floor is made of parallel metal bars and serves as a contextual cue because it is different from the floor of the regular FR5 sessions, without shock. In the regular FR5 sessions, a metal lamina with holes covers the grid floor and acts as a discriminative stimulus. In addition, during this session, pressing the active lever had no consequences: no shock, no chocolate-flavored pellets, and no cue-light. Therefore, the total non-reinforced active responses during this shock-context test were considered a measure of aversive cue reactivity. High active responses mean low cue-reactivity to the context (grid floor) associated with the aversive stimulus (shock).

Considering the individual score in each addiction-like criteria and the phenotypic traits associated with the disease, we selected some addicted and non-addicted mice with extreme phenotypes exposed to chocolate-flavored pellets to evaluate the differential miRNA epigenetic signature underlying the loss of control toward palatable food. For these studies, a specific brain area (medial prefrontal cortex, mPFC) was extracted immediately after the last FR5 session.

*Candidate miRNAs functional validation.* For the study of the inhibition of miR-29c-3p, miR-665-3p, and miR-137-3p in mPFC (specifically in the PL subregion), mice followed the same behavioral procedure described for the early period in the first experiment with some variations due to the surgical adeno-associated virus (AAV) injection (Fig. 5B). In particular, C57BL/6J WT mice were trained to acquire the operant conditioning maintained by chocolate-flavored pellets under FR1 (2 sessions) and FR5 (8 sessions) schedule of reinforcement followed by the surgery for injecting AAVs carrying the miRNA inhibitor (tough decoy (TuD) approach) (Fig. 5A). The TuD approach is one of the most potent approaches for miRNA inhibition strategies and provides the longest miRNA inhibition time compared with modified antimiRs and sponge decoy (6). TuDs are 100 nucleotides long and form a hairpin structure that increases their stability and contains an unpaired region in the middle. Both strands from this unpaired region are complementary to the target miRNA (6–8). Regarding miR-29c-3p inhibition, n=12 mice were injected with AAV-anti-mmu-miR-29c-3p TuD, and n=19 were injected with the AAV-control TuD; regarding miR-665-3p inhibition, n=19 mice were injected with AAV-anti-mmu-miR-665-3p TuD and n=18 were injected with the AVV-control TuD, and regarding miR-137-3p inhibition, n=16 mice were injected with AAV-control TuD and n=17 for AAV-anti-mmu-miR-665-3p TuD mice.

After bilateral intracranial injection of the AAV in the PL, the AAV expression was allowed for 4 weeks. After these 4 weeks, mice were under FR5 scheduled sessions followed by the measurement of the 3 addiction-like criteria and the subsequent classification of addicted and non-addicted mice. Mice were also tested for the 4 addiction-related phenotypic traits (Fig. S5, S6, and S7). After the last operant-conditioning session, animals were euthanized by decapitation, and brains were quickly removed and frozen

in methylbutane (previously stored at -80°C overnight). Brains were cut in the cryostat at -20°C. The prefrontal part of the brain (where PL, our area of interest, is located) was cut, alternating two different widths with obtaining different information (Fig. S4C). Brain slices of 30 µm were placed in a microscope slide (gelatinized KNITTEL StarFrost® slides 76 x 26 mm) embedded in mounting media (Fluomount-G™ with DAPI from Invitrogen) and covered with cover glass (deltalab 60 x 24 mm) to detect the presence of the AAV by GFP expression. Separately, in brain slices of 100 µm, mPFC were isolated by cutting meticulously with a scalpel. mPFC fragments of 11 mg were used for molecular confirmation by an RT-qPCR protocol explained below.

## Food pellets

A standard pellet (20 mg, TestDiet, Richmond, IN, USA) or a chocolate-flavored pellet (20 mg, highly isocaloric pellet, TestDiet, Richmond, IN, USA) was delivered after pressing the active lever during the operant conditioning sessions. The standard pellets contain 24.1% protein, 10.4% fat, 65.5% carbohydrate with a caloric value of 3.30 kcal/g, while the chocolate-flavored pellets contain 20.6% protein, 12.7% fat, 66.7% carbohydrate with a caloric value of 3.44 kcal/g. Although both pellets presented a similar percentage of carbohydrates and caloric value, chocolate-flavored pellets included slight differences in their composition with an addition of chocolate flavor (2% pure unsweetened cocoa) and a higher proportion of sucrose content (50.1%) compared to standard pellets (8.3%). Indeed, although the carbohydrate content was similar in standard (65.5%) and highly palatable isocaloric pellets (66.8%), the proportion of sugars within this carbohydrate amount was different: sucrose content in standard pellets was 3.1% of the total carbohydrates and 50.1% in highly palatable pellets. These pellets were

presented only during the operant behavior sessions, and animals were maintained on standard chow for their daily food intake (1, 3, 9).

## Drugs

To anesthetize mice during the surgical procedure to inject the AAV, an injection of ketamine hydrochloride (Imalgène; Merial Laboratorios S.A.) and medetomidine hydrochloride (Domtor; Esteve, Spain) mixed and dissolved in sterile 0.9% physiological saline (75 mg/kg and 1 mg/kg of body weight respectively) was intraperitoneally (i.p.) administered. After surgery, anesthesia was reversed by a subcutaneous (s.c.) injection of atipamezole hydrochloride (Revertor; Virbac, Spain; 2.5 mg/kg of body weight) dissolved in sterile 0.9% physiological saline. In addition, mice received an i.p. injection of gentamicin (Genta-Gobens; Laboratorios Normon, Spain; 1 mg/kg of body weight) and a s.c. injection of meloxicam (Metacam; Boehringer Ingelheim, Rhein; 2 mg/kg of body weight) both dissolved in sterile 0.9% physiological saline.

## Surgery and virus vector microinjection

Mice were anesthetized as described in the drugs section and placed into a stereotaxic apparatus for receiving the intracranial injections of the AAV-anti-miR-29c-3p TuD (Y4364 pAAV-CAG-eGFP-U6-TuD-RNA-mmumiR-29c-3p,  $1.0 \times 10^{12}$  gc/ml, from Obio Technology Corp., Ltd., Shanghai, China), the AAV-anti-miR-665 TuD (Y11816 pAAV-CAG-eGFP-U6-TuD-RNA-mmumiR-665-3p,  $1.0 \times 10^{12}$  gc/mL, from Obio Technology Corp., Ltd. Shanghai, China), the AAV-anti-miR-137 TuD (Y11817 pAAV-CAG-eGFP-U6-TuD-RNA-mmumiR-137-3p,  $2.0 \times 10^{12}$  gc/ml, from Obio Technology Corp., Ltd. Shanghai, China) or



the AAV-control TuD ( $1.0E+12$  gc/ml from Obio Technology Corp., Ltd. Shanghai, China) as a control. All the viruses are from Obio Technology Corp., Ltd. Shanghai, China. AAV-anti-miR-29c-3p TuD and AAV-control TuD have been tested before, and the effectiveness of the TuD inhibitors has been validated in (10). A detailed explanation step by step of the surgery was reported in (2). Briefly, the injections of the AAV were made through a bilateral injection cannula (33-gauge internal cannula, Plastics One, UK) connected to a polyethylene tubing (PE-20, Plastics One, UK) attached to a 10  $\mu$ l microsyringe (Model 1701 N SYR, Cemented NDL, 26 ga, 2 in, point style 3, Hamilton company, NV). The displacement of an air bubble inside the length of the polyethylene tubing that connected the syringe to the injection needle was used to monitor the microinjections. The volume of 0.2  $\mu$ l per site in the prelimbic (PL) area was injected at a constant rate of 0.05  $\mu$ l/min by using a microinfusion pump (Harvard Apparatus, Holliston, MA) for 4 min. After infusion, the injection cannula was left in place for an additional period of 10 min to allow the fluid to diffuse and to prevent reflux, and then it was slowly withdrawn for 10 additional min. We applied the following coordinates to target the PL area according to Paxinos and Franklin (11): AP +1.98 mm, L  $\pm$ 0.3 mm, DV -2.3 mm.

To detect the viral expression of the AAVs, mice sacrificed at the end of the experiment (Fig. S4C), and the fluorescent reporter GFP was directly visualized in brain slices using a Leica DMR microscope equipped with a digital camera Leica DFC 300FX (10x objectives). Thus, GFP is a green fluorescent protein that was visible in our experimental conditions without performing immunofluorescence.

## Principal component analysis

The principal component analysis (PCA) technique was used to evaluate the multidimensional data obtained in mice trained with chocolate-flavored pellets in the late period. PCA and varimax rotation were conducted using the 3 addiction-like criteria and the 4 phenotypic traits considered as factors of vulnerability to addiction and were dimensionality reduced to the minimum number of components that best explain and maximizes the variance present in the data set. An eigenvalue greater than 0.7 was set as the criterion for selecting components.

### **MicroRNA signatures in humans**

Consecutive subjects from the IRONMET cohort with available YFAS 2.0 scores were recruited for this study (n=51) to analyze circulating miRNAs. The IRONMET cohort is a cross-sectional case-control study setting at the Endocrinology Department of Dr. Josep Trueta University Hospital (Table 3). The recruitment of subjects started in January 2016 and finished in October 2017. Consecutive middle-aged subjects, 27.2–66.6 years, were included. Patients with obesity (body mass index (BMI)  $\geq 30$  kg/m<sup>2</sup>) and age-matched and sex-matched subjects without obesity (BMI 18.5– $< 30$  kg/m<sup>2</sup>) were eligible. Exclusion criteria were type 2 diabetes mellitus, chronic inflammatory systemic diseases, acute or chronic infections in the previous month; use of antibiotic, antifungal, antiviral or treatment with proton pump inhibitors; severe disorders of eating behavior or major psychiatric antecedents; neurological diseases, history of trauma or injured brain, language disorders and excessive alcohol intake ( $\geq 40$  g OH/day in women or 80 g OH/day in men). The Institutional review board - Ethics Committee and the Committee for Clinical Research (CEIC) of Dr. Josep Trueta University Hospital (Girona, Spain) approved the study protocol and informed written consent was obtained from all participants.

### Profile of Circulating miRNAs

*Circulating RNA Extraction and Purification.* Plasma was obtained by standard venipuncture and centrifugation using EDTA-coated Vacutainer tubes (Becton-Dickinson, Franklin Lakes, NJ). The separation of the plasma was performed by double-centrifugation using a laboratory centrifuge (Beckman J-6M Induction Drive Centrifuge, Beckman Instruments Inc., Palo Alto, CA). RNA extraction was performed from a starting volume of 300  $\mu$ L of plasma using the mirVana PARIS Isolation Kit (Applied Biosystems, Darmstadt, Germany), according to manufacturer's instructions. Before RNA isolation, two synthetic oligonucleotides corresponding to miRNAs that do not exist in humans were spiked-in for quality control. These "exogenous" controls were synthesized to match the sequence of miRNAs of *C. elegans*, cel-miR-39 and cel-miR-54 (Qiagen, Gaithersburg, MD). The spiked-in oligonucleotides were introduced into the plasma sample as a mixture of 20 fmol in a 5  $\mu$ L total volume of water and after addition of 2x Denaturing Solution. The final recovery of these synthetic oligonucleotides was measured for each sample using TaqMan qRT-PCR miRNAs assays (Applied Biosystems, Darmstadt, Germany). To validate the success of each extraction, we also assessed the thermal cycle (Ct) values obtained for a serial dilution (10<sup>-1</sup>) of these miRNAs. Samples with recovery values less than approximately 50% were excluded.

*Circulating miRNAs Retrotranscription and Pre-amplification.* A fixed volume of 3  $\mu$ L RNA solution from the 40-mL eluate of RNA isolation was used as input into the retrotranscription using the TaqMan miRNA Reverse Transcription kit (Life Technology, Darmstadt, Germany). Pre-amplification was performed using TaqMan PreAmp Master Mix (Life Technology, Darmstadt, Germany).

### **Analysis of Individual miRNAs Using TaqMan Hydrolysis Probes**

Commercially available TaqMan hydrolysis probes (Applied Biosystems) were used to assess the presence in plasma of individual miRNAs. Gene expression was assessed by real-time PCR using the Light Cycler 480 Real-Time PCR System (Roche Diagnostics, Barcelona, Spain), using TaqMan technology suitable for relative gene expression quantification following the manufacturer's protocol. For the quantitative RT-PCR analysis, we performed the DeltaCt normalization using four well-known stable miRNAs in plasma (miR-106a, miR-146a, miR-19b and miR-223). The average of these four selected internal controls was used as a normalizing factor, as previously described (12). Ct values higher than 35 were excluded. TaqMan hydrolysis probes used were the following: hsa-miR-876-5p (002205), hsa-miR-211 (000514), hsa-miR-665 (002681), hsa-miR-29c (000587), hsa-miR-544 (002265), hsa-miR-137 (000593), hsa-miR-100 (000437), hsa-miR-192 (000491), hsa-miR-3085-3p (464290\_mat), hsa-miR-124-3p (003188\_mat), miR-106a (002169), miR-146a (000468), miR-19b (000396), miR-223 (002295), cel-miR-39 (000200) and cel-miR-54 (001361).

*Yale Food Addiction Scale:* The YFAS is a 35-item questionnaire that assesses addictive-like eating according to the diagnostic criteria for substance dependence (13, 14). The YFAS has been shown to have adequate psychometric properties (original validation study Cronbach alpha=0.86) (13). The tool includes two scoring options: a symptom score from 0–11 based on the DSM criteria for substance dependence (FA diagnosis if  $\geq 3$  symptoms are reported) and clinical impairment or distress.

In this study, we used the Spanish YFAS 2.0 that is also a 35-item self-report instrument that measured the presence or absence of food addiction symptoms based on the eleven diagnostic criteria for Substance-Related and Addictive Disorders (SRAD) in the DSM-5 adapted to the context of highly processed food (15). Each YFAS 2.0 question had eight frequency responses (0 = “never”, 7 = “every day”), and depending on this, the question threshold was met or not met. As specific YFAS 2.0 questions represented one DSM-5 SRAD criterion, if the sum of questions under one addiction criterion was  $\geq 1$ , the addiction criterion was met and scored as 1. If the sum was 0, then the addiction criterion was not met and scored as 0. Finally, it was counted the number of addiction criteria met, and reaching two addiction criteria was sufficient to be considered food addicted if clinical significance impairment or distress were reported (15). Since certain YFAS 2.0 questions represented a specific DSM-5 addiction criterion and specific DSM-5 criteria were grouped in three addiction-like criteria, (1) persistence of response, (2) motivation, and (3) compulsive-like behavior, in the food addiction mouse model, each addiction-like criterion could be denoted by exact YFAS 2.0 questions as follows: persistence of response, YFAS 2.0 questions 1, 2, 3, 4, 25, 31 and 32; motivation, YFAS 2.0 questions 5, 6, 7, 8, 10, 18 and 20; compulsive-like behavior: YFAS 2.0 questions 22 and 23. In this study, the total question score for each addiction-like criterion in human graphs was the sum of the frequency mark obtained in each YFAS 2.0 question. The YFAS 2.0 was translated into Spanish according to the International Test Commission Guidelines for Translating and Adapting Tests by two bilingual clinical psychologists experts in eating disorders. The validated Spanish version YFAS 2.0 showed good psychometric properties with internal consistency, accuracy, discriminative and convergent validity with other eating-related constructs (16).

## Human studies: Gene-based association analysis

GWAs summary statistics of BMI (that includes about ~700000 individuals) was obtained from the GIANT database ([https://portals.broadinstitute.org/collaboration/giant/index.php/GIANT\\_consortium\\_data\\_files](https://portals.broadinstitute.org/collaboration/giant/index.php/GIANT_consortium_data_files)) (17). Gene-based association studies were performed on MAGMA v1.06 using the 1000 Genomes Project Phase 3 (European data only) as a reference panel. We used the SNP-wise mean model, which uses a statistic test of the sum of  $-\log(\text{SNP p-value})$  for SNPs located within the transcribed region. For miRNA, we selected all miRNA genes encoding each differentially expressed mature miRNA and the regulatory regions identified according to histone marks H3K4me1 and H3K27Ac (suggestive of enhancer regions) and H3K4me3 (associated with promoters) from the ENCODE regulation track in the UCSC Genome Browser (assembly GRCh37/hg19), as previously described (10). For target genes, we used NCBI 37.3 gene definitions without window around genes. We obtained a list of miRNAs target genes both validated (miRTarBase; <http://mirtarbase.mbc.nctu.edu.tw/php/index.php>) (18) and predicted (miRSystem; <http://mirsystem.cgm.ntu.edu.tw/>).

## RNA extraction

Animals were euthanized by decapitation, and brains were quickly removed. The mPFC brain area was dissected following coordinates from Paxinos and Franklin (Paxinos, G. and Franklin, 2001): mPFC AP+1.98 mm. Samples were frozen by immersion in 2-methylbutane surrounded by dry ice and stored at  $-80^{\circ}\text{C}$  for later quantification of

miRNA expression. According to the manufacturer's protocol, total RNA, including miRNA, was isolated from mPFC using the AllPrep DNA/RNA/miRNA Universal Kit (Qiagen Düsseldorf, Germany) according to the manufacturer's protocol and stored at -70°C.

## Library preparation and smallRNA sequencing

SmallRNA sequencing (smallRNA-seq) was performed by the Centre de Regulació Genòmica (CRG, Barcelona, Spain). RNA integrity was assessed by Agilent 2100 Bioanalyzer (Agilent Technologies, Santa Clara, CA, USA) and quantified through qPCR. According to the manufacturer, libraries were prepared with the NEBNext® Ultra™ Small R.N.A. Library Prep set for Illumina (New England Biolabs, Ipswich, MA, USA) 's protocol and sequenced 1x50 Illumina HiSeq2500 System for both the discovery and replica samples. The analysis of smallRNA-seq was carried out through the OASIS2 pipeline (<http://oasis.dzne.de/>)(19). Briefly, the quality of reads was inspected using FastQC v0.10.1(20), and data was cleaned using CutAdapt 1.7.1(21) to remove adapters, and low-quality reads, and only the reads between 15-32bp were kept. Next, reads were mapped against the *mus musculus* genome of reference (GRCm38/mm10) with STAR 2.4.1d(22), allowing 0 mismatches for reads of length 15-19bp and 1 mismatch for reads between 20-32bp. Finally, the differential expression analysis was done by DESeq2 (23). In order to discard those miRNAs with very low expression or sequencing errors, we only considered the mature miRNA showing at least five reads across all the samples. We selected those miRNAs showing nominal differential expression in mPFC, with concordant effects on gene expression in both the discovery and replica samples. We then used the two-tailed Fisher Exact test to determine the statistical significance of the

overlap observed between the discovery and replica samples for each brain area, considering up-and down-regulated genes separately. We only used those genes for further analysis, showing a statistical significance of the overlap observed between samples.

## RNA sequencing

Sequencing of mRNAs (mRNAseq) from mPFC samples was also carried out by the CRG (Barcelona, Spain). RNA integrity was previously assessed by Bioanalyzer (see above) and quantified with a Qubit fluorometer. The KAPA Stranded mRNA-Seq Kit (Roche, Basel, Switzerland) was used to construct the libraries and sequenced on an Illumina HiSeq 3000/4000 with 75 bp paired end (PE) reads for the discovery sample and on an Illumina NovaSeq 6000 SP with 50 PE reads for the replica sample. RNAseq reads were cleaned of adapters and low-quality reads and mapped against the *Mus musculus* genome of reference (GRCm38/mm10) using STAR version 2.5.3a (Dobin et al., 2013) with ENCODE parameters. The annotated genes were quantified (Gencode version M18 and M24 for the discovery and replica sample, respectively) using RSEM version 1.3.0 (12) with default options. Differential expression between conditions was performed with DESeq2 version 1.18 (23) using the Wald test and correcting the results for multiple testing using the Benjamini and Hochberg method.

## Prioritization of differentially expressed miRNAs

We filtered out those miRNAs with low expression considering  $\text{baseMean} < 300$ . Then, we obtained a list of the miRNAs target genes both validated (miRTarBase;



<http://mirtarbase.mbc.nctu.edu.tw/php/index.php>) (18) and predicted (miRSystem; <http://mirsystem.cgm.ntu.edu.tw/>) (24). Then, we performed a two-tailed Fisher Exact test using data from mRNAseq of the same samples to identify the enrichment of the miRNA target genes among the differentially expressed protein-coding genes, separately for the discovery and replication sample. Finally, we search on the bibliography information about these miRNAs related to “addiction”, “psychiatric disorders”, and “obesity” to filter miRNA based on the novelty of the findings and to their possible therapeutic target.

## Analysis of miRNA networks and miRNAs target genes

To inspect the relationships among the DE miRNAs and their target genes, we performed network analysis using the web-based platform miRNet (<https://www.mirnet.ca/miRNet/home.xhtml>) (25). We used the “Degree Filter” to retain more nodes with more connections. In addition, we used the “Function explorer” option to perform an analysis of KEGG pathways of all miRNA target genes using the default options. Finally, we used the lists of target genes of each miRNA to perform enrichment analysis on biological functions using Gene Ontology non-redundant Biological Process (GO) and Kyoto Encyclopedia of Genes and Genomes (KEGG) with the webtool WebGestAlt (WEB-based GENE SET Analysis Toolkit, <http://www.webgestalt.org/>) (26).

## RT-qPCR of miRNAs and target genes

Total RNA with miRNAs was extracted from samples of mice treated with AAV-anti-miR-665 TuD (n=19) and the AVV-control TuD (n=18) using the miRNeasy micro kit (Qiagen) according to the manufacturer's protocol. Changes in gene expression of miR-665-3p target genes: *Ncam1*, and *Rbfox1*, were analyzed. mRNA was retrotranscribed using the High Capacity cDNA Reverse Transcription kit (Roche Life Science, Branford, CT, USA) and quantified by RT-qPCR using the LightCycler® 480 SYBR Green I Master (Roche). In both cases, relative quantification was performed on LightCycler® 480 Software, Version 1.5 (Roche Life Science) by the comparative Ct ( $\Delta\Delta\text{Ct}$ ) method using reference genes *Gapdh*, *Hprt1*, and *Pgk1*. Differences between conditions were evaluated with a Student t-test or U Mann-Whitney depending on the distribution defined by the Kolmogorov-Smirnov normality test using SPSS statistics software version 22.0.

## References

1. Domingo-Rodríguez L et al. A specific prelimbic-nucleus accumbens pathway controls resilience versus vulnerability to food addiction. *Nat. Commun.* 2020;11(1):1–16.
2. Martín-García E, Domingo-Rodríguez L, Maldonado R. An operant conditioning model combined with a viral vector approach to study the neurobiology of food addiction in mice. *Bio-protocol* 2020;10(19):1–23.
3. Mancino S et al. Epigenetic and Proteomic Expression Changes Promoted by Eating Addictive-Like Behavior.. *Neuropsychopharmacology* 2015;40(12):2788–800.
4. Dimet AL et al. A protocol for measuring cue reactivity in a rat model of cocaine use disorder. *J. Vis. Exp.* 2018;2018(136):1–8.
5. Koob GF, Volkow ND. Neurocircuitry of addiction. *Neuropsychopharmacology* 2010;35(1):217–238.
6. Hollensen AK et al. Enhanced Tailored MicroRNA Sponge Activity of RNA Pol II-Transcribed TuD Hairpins Relative to Ectopically Expressed ciRS7-Derived circRNAs. *Mol. Ther. - Nucleic Acids* 2018;13(December):365–375.
7. Bak RO, Hollensen AK, Primo MN, Sørensen CD. Potent microRNA suppression by RNA Pol II-transcribed 'Tough Decoy' inhibitors2013;280–293.
8. Maldonado R et al. Genomics and epigenomics of addiction. *Am. J. Med. Genet.* 2021;https://doi.org/10.1002/ajmg.b.32843.
9. Burokas A et al. Extinction and reinstatement of an operant responding maintained by food in different models of obesity. *Addict. Biol.* 2018;23(2):544–555.
10. Su H et al. Regulation of microRNA-29c in the nucleus accumbens modulates

- methamphetamine -induced locomotor sensitization in mice. *Neuropharmacology* 2019;148(January):160–168.
11. Paxinos, G. and Franklin KBJ. *The Mouse Brain in Stereotaxic Coordinates*. Academic Press, San Diego: 2001:
  12. Li B, Dewey C. Assembly of non-unique insertion content using next-generation sequencing. *RSEM accurate Transcr. Quantif. from RNA-Seq data with or without a Ref. genome* 2011;21–40.
  13. Gearhardt AN, Corbin WR, Brownell KD. Preliminary validation of the Yale Food Addiction Scale. *Appetite* 2009;52(2):430–436.
  14. Schulte EM, Gearhardt AN. Development of the Modified Yale Food Addiction Scale Version 2.0. *Eur. Eat. Disord. Rev.* 2017;25(4):302–308.
  15. Gearhardt AN, Corbin WR, Brownell KD. Development of the Yale Food Addiction Scale Version 2.0.. *Psychol. Addict. Behav.* 2016;30(1):113–121.
  16. Granero R et al. Validation of the Spanish version of the Yale Food Addiction Scale 2.0 (YFAS 2.0) and clinical correlates in a sample of eating disorder, gambling disorder, and healthy control participants. *Front. Psychiatry* 2018;9(MAY):1–11.
  17. Yengo L et al. Meta-analysis of genome-wide association studies for height and body mass index in ~700000 individuals of European ancestry.. *Hum. Mol. Genet.* 2018;27(20):3641–3649.
  18. Chou C-H et al. miRTarBase update 2018: a resource for experimentally validated microRNA-target interactions. *Nucleic Acids Res.* 2018;46(D1):D296–D302.
  19. Rahman R-U et al. Oasis 2: improved online analysis of small RNA-seq data. *BMC Bioinformatics* 2018;19(1):54.
  20. Andrews S. FastQC: A quality control tool for high throughput sequence data.2010;
  21. Martin M. Cutadapt removes adapter sequences from high-throughput sequencing reads. *EMBnet.journal* 2011;17(1):10.
  22. Dobin A et al. STAR: Ultrafast universal RNA-seq aligner. *Bioinformatics* 2013;29(1):15–21.
  23. Love MI, Huber W, Anders S. Moderated estimation of fold change and dispersion for RNA-seq data with DESeq2. *Genome Biol.* 2014;15(12):550.
  24. Lu T-P et al. miRSystem: An Integrated System for Characterizing Enriched Functions and Pathways of MicroRNA Targets. *PLoS One* 2012;7(8):e42390.
  25. Fan Y et al. miRNet - dissecting miRNA-target interactions and functional associations through network-based visual analysis. *Nucleic Acids Res.* 2016;44(W1):W135–W141.
  26. Liao Y, Wang J, Jaehnig EJ, Shi Z, Zhang B. WebGestalt 2019: gene set analysis toolkit with revamped UIs and APIs. *Nucleic Acids Res.* 2019;47(W1):W199–W205.

# Figures and legends

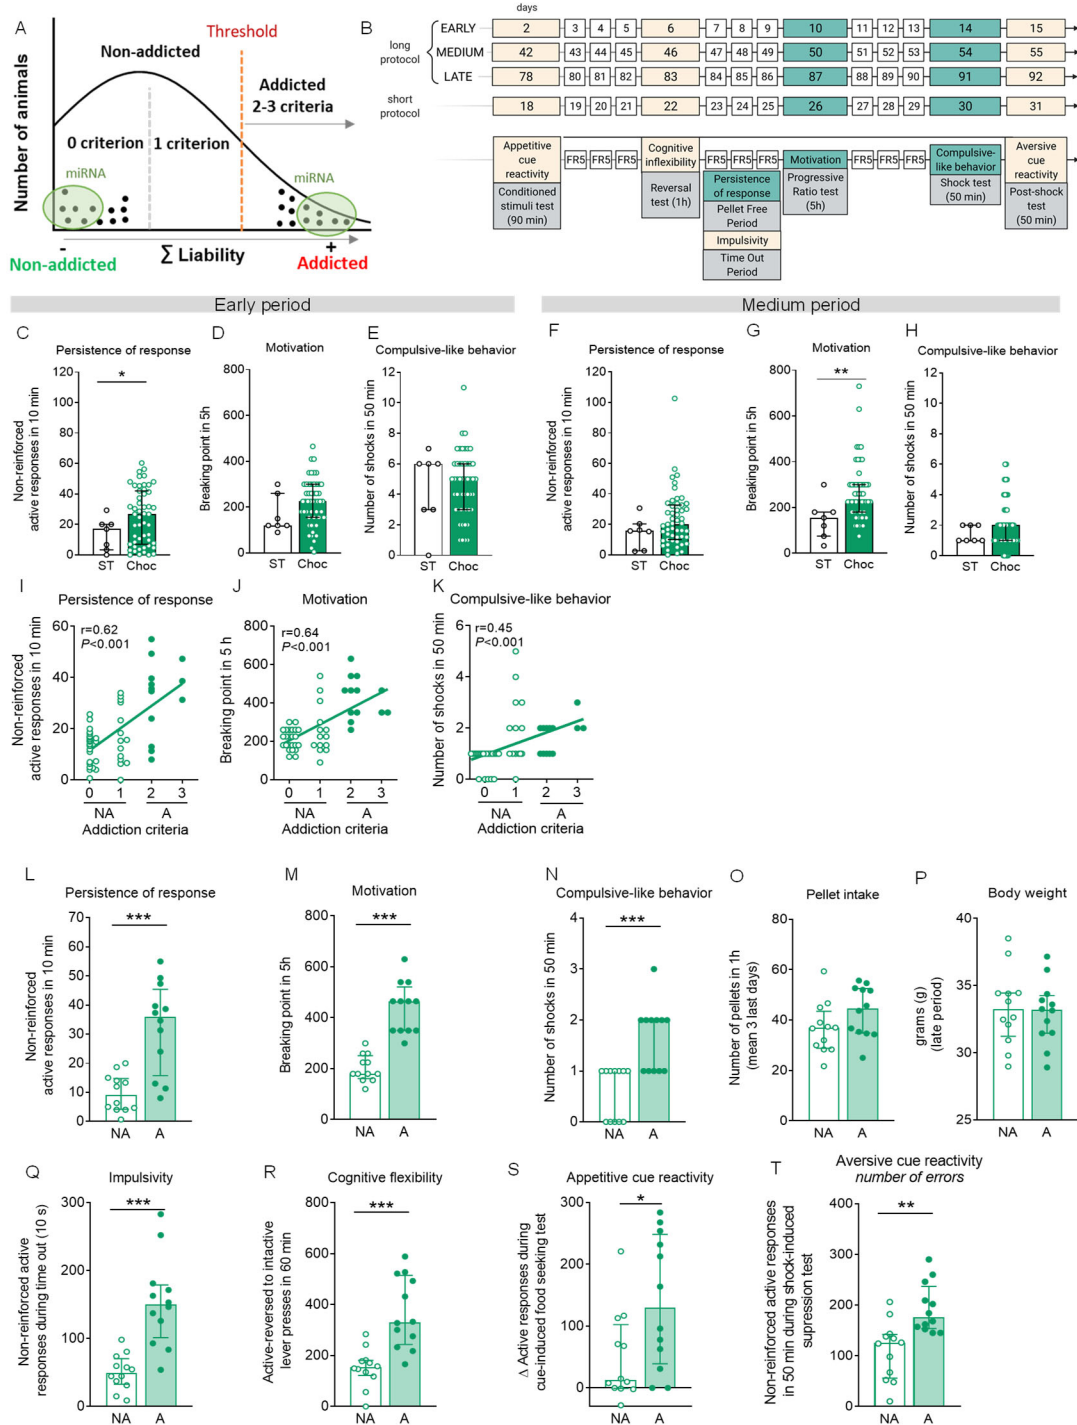

Fig. S1

**Fig. S1. Complementary characterization of two extreme subpopulations of addicted and non-addicted mice obtained by operant training with chocolate-flavored pellets.**

**(A)** Inverted U-shaped curve showing that operant training with chocolate-flavored

pellets allows distinguishing extreme subpopulations of addicted and non-addicted mice. **(B)** Timeline of the experimental sequence for the long and short protocols indicating the specific time each test was performed. **(C-E)** Behavioral tests for the 3 addiction-like criteria in the early period expressed by individual values with the median and interquartile range. **(C)** persistence of response (t-test, \* $P < 0.05$ ) **(D)** motivation, **(E)** compulsive-like behavior. **(F-H)** Behavioral tests for the 3 addiction-like criteria in the medium period expressed by individual values with the median and interquartile range. **(F)** persistence of response, **(G)** motivation (U Mann-Whitney \*\*  $P < 0.01$ ), **(H)** compulsive-like behavior. **(I-K)** Pearson correlations between individual addiction-like criteria and **(I)** non-reinforced active responses in 10 min ( $r = 0.62$ ,  $P < 0.001$ ), **(J)** breaking point in 5 h ( $r = 0.64$ ,  $P < 0.001$ ), **(K)** number of shocks in 50 min ( $r = 0.45$ ,  $P < 0.001$ ).

Behavioral tests of the three addiction-like criteria **(L-N)** and pellets intake **(O)**, and body weight **(P)**, in addition to the 4 additional factors of vulnerability to addiction **(Q-T)** for those mice selected for the epigenetic study in addicted ("A") and non-addicted ("NA") mice trained with chocolate pellets. **(L)** persistence of response (U Mann-Whitney \*\*\*  $P < 0.001$ ). **(M)** Motivation (t-test \*\*\*  $P < 0.001$ ). **(N)** Compulsive-like behavior (U Mann-Whitney \*\*\*  $P < 0.001$ ), **(O)** Pellets intake in the last FR5 three sessions, **(P)** body weight in the late period, **(Q)** Impulsivity (t-test \*\*\*  $P < 0.001$ ), **(R)** Cognitive flexibility (t-test \*\*\*  $P < 0.001$ ), **(S)** appetitive cue-reactivity (t-test \*  $P < 0.05$ ), **(T)** aversive cue-reactivity (U Mann-Whitney \*\*  $P < 0.01$ ) ( $n = 12$  A mice,  $n = 12$  NA mice; individual values with the median and the interquartile range). Statistical details are included in Table S10.

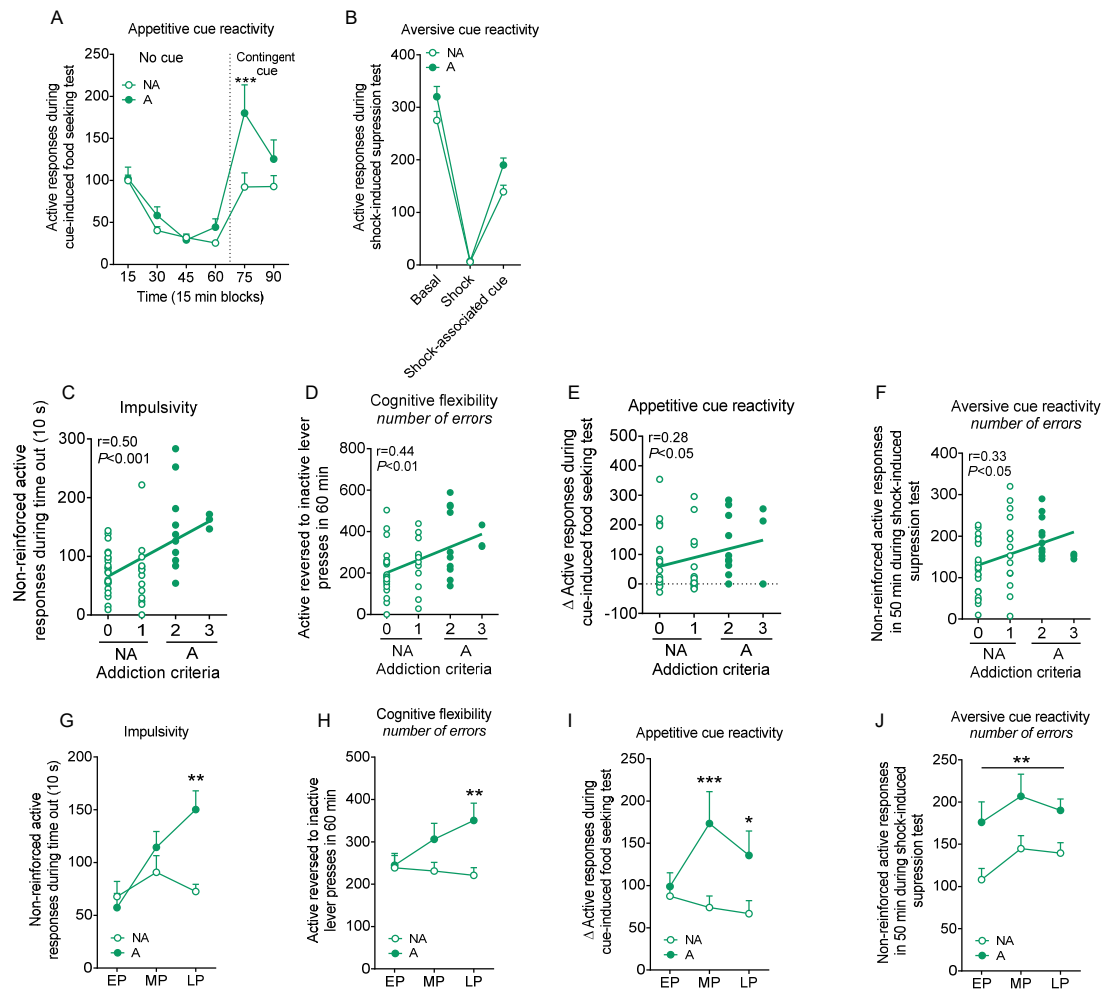

**Fig. S2. Characterization of phenotypic traits related to addiction in two extreme subpopulations of addicted (A) and non-addicted mice (A).** Appetitive cue-reactivity measured by the number of active responses during 90-min cue-induced food-seeking test (mean  $\pm$  SEM; repeated measures ANOVA; time x addiction categorization  $P<0.01$ , Fisher LSD posthoc analysis,  $***P<0.001$ ). **(B)** The number of active responses measures aversive cue-reactivity during the shock-induced suppression test. **(C-F)** Pearson correlations between individual addiction-like criterion and **(C)** impulsivity ( $r=0.50$ ,  $P<0.001$ ); **(D)** cognitive flexibility ( $r=0.44$ ,  $P<0.01$ ); **(E)** appetitive cue-reactivity ( $r=0.28$ ,  $P<0.05$ ) and **(F)** aversive cue-reactivity ( $r=0.33$ ,  $P<0.05$ ). **(G-J)** Evolution over early, medium and late periods of **(G)**, impulsivity (mean  $\pm$  SEM; repeated measures ANOVA; periods effect  $P<0.01$ , periods x addictive phenotype  $P<0.05$ , Fisher LSD post

hoc analysis, \*\*P<0.01), **(H)** cognitive flexibility (mean  $\pm$  SEM; repeated measures ANOVA; periods x addiction categorization P<0.05, Fisher LSD post hoc analysis, \*\*P<0.01), **(I)** appetitive cue-reactivity (mean  $\pm$  SEM; repeated measures ANOVA, Fisher LSD post hoc analysis, \*P<0.05, \*\*\*P<0.001) and **(J)** aversive cue-reactivity (mean  $\pm$  SEM; repeated measures ANOVA; addiction categorization effect, \*\*P<0.01). Statistical details are included in Table S10.

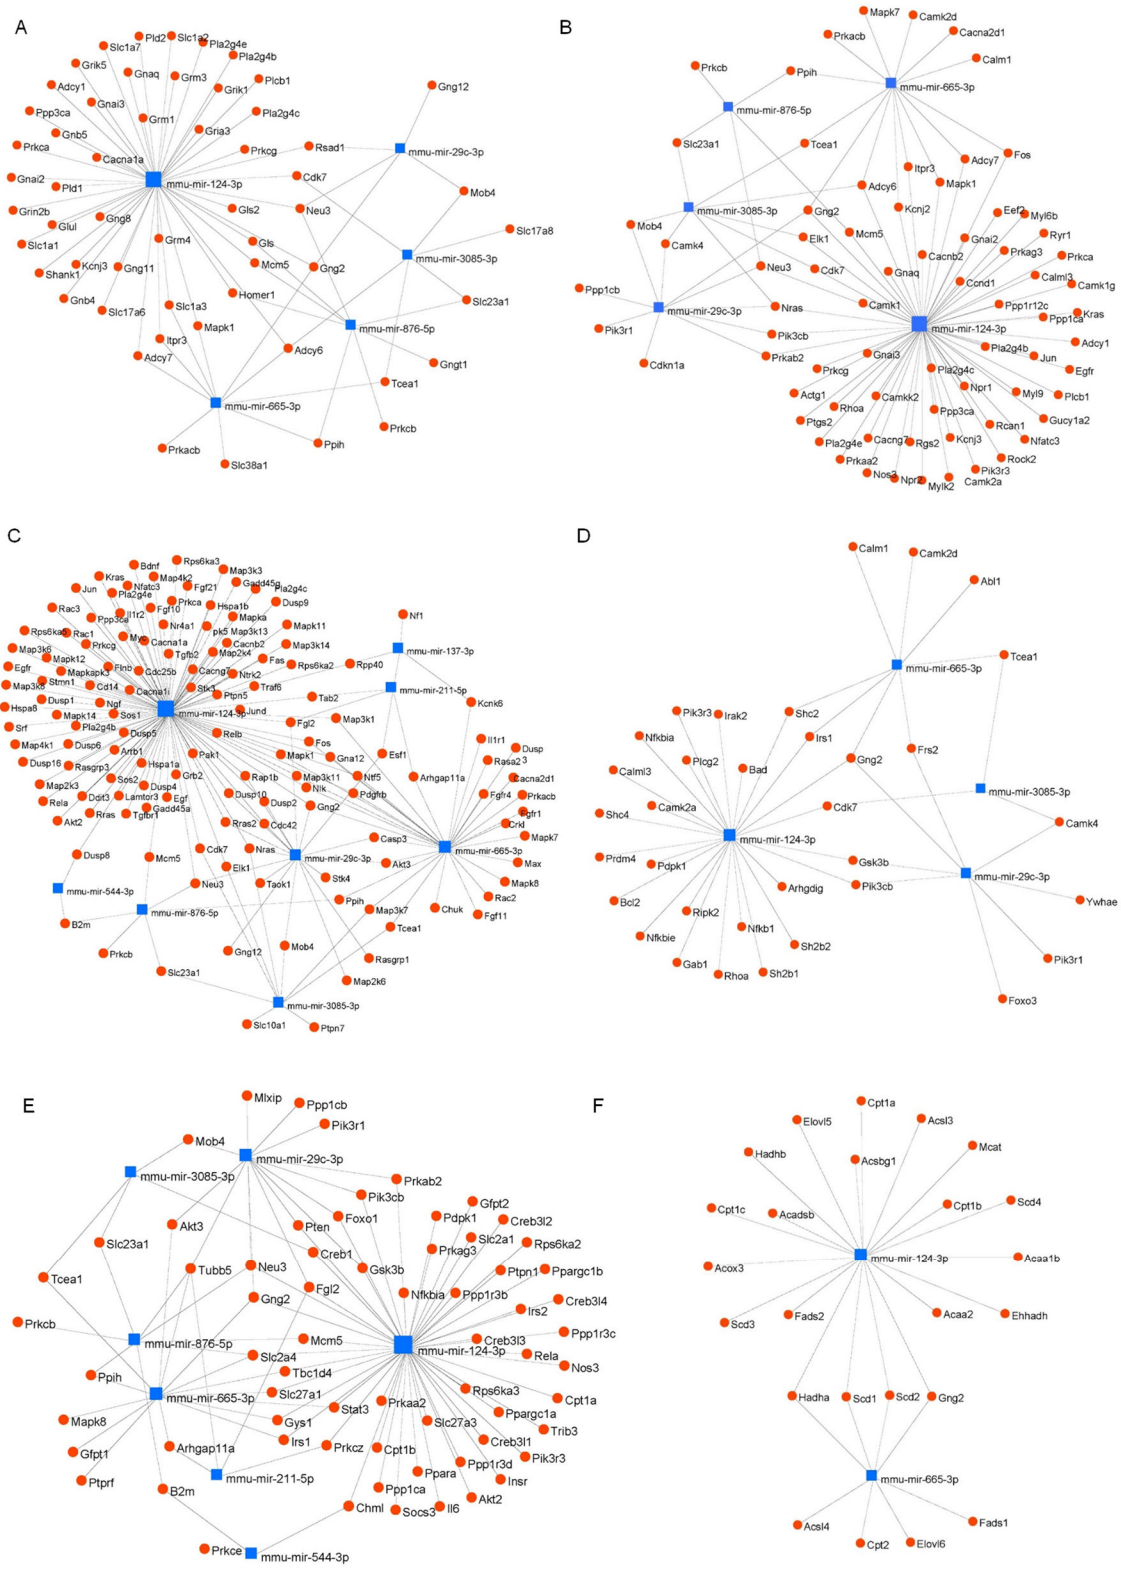

**Fig. S3. Networks of the selected KEGG pathways enriched among the downregulated miRNAs and their target genes.** Results of networks from miRNet analysis based on the KEGG pathways (A) glutamatergic synapse, (B) oxytocin signaling pathway, (C) MAPK



signaling pathway, **(D)** neurotrophin signaling pathway, **(E)** insulin resistance, and **(F)** fatty acid metabolism.

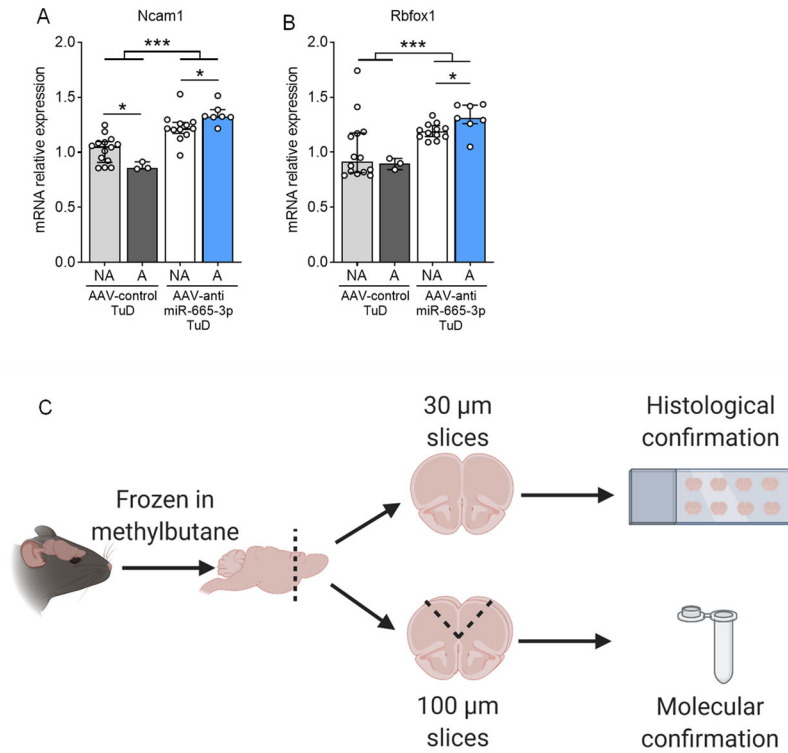

**Fig. S4. Detection of mmu-miR-665-3p target genes in PL mPFC. (A)** *Ncam1* and **(B)** *Rbfox1* were significantly upregulated in AVV-anti mmu-miR-665-3p TuD mice, and the expression of these genes was also higher in addicted AAV-anti-mmu-miR-665-3p TuD mice than non-addicted mice. **(C)** Histological verification of correct AAV injection. After behavioral experiments, mice were sacrificed, and brain tissue was rapidly dissected, immediately frozen in methylbutane and dry ice, and stored at  $-80^{\circ}\text{C}$  until used. To detect the viral expression in all the experiments, the GFP reporter was visualized directly in the fluorescence microscope in coronal slices of 30  $\mu\text{m}$ . We also performed qPCR analysis for molecular analysis using interleaved coronal slices of 100  $\mu\text{m}$ . Statistical details are included in Table S13.

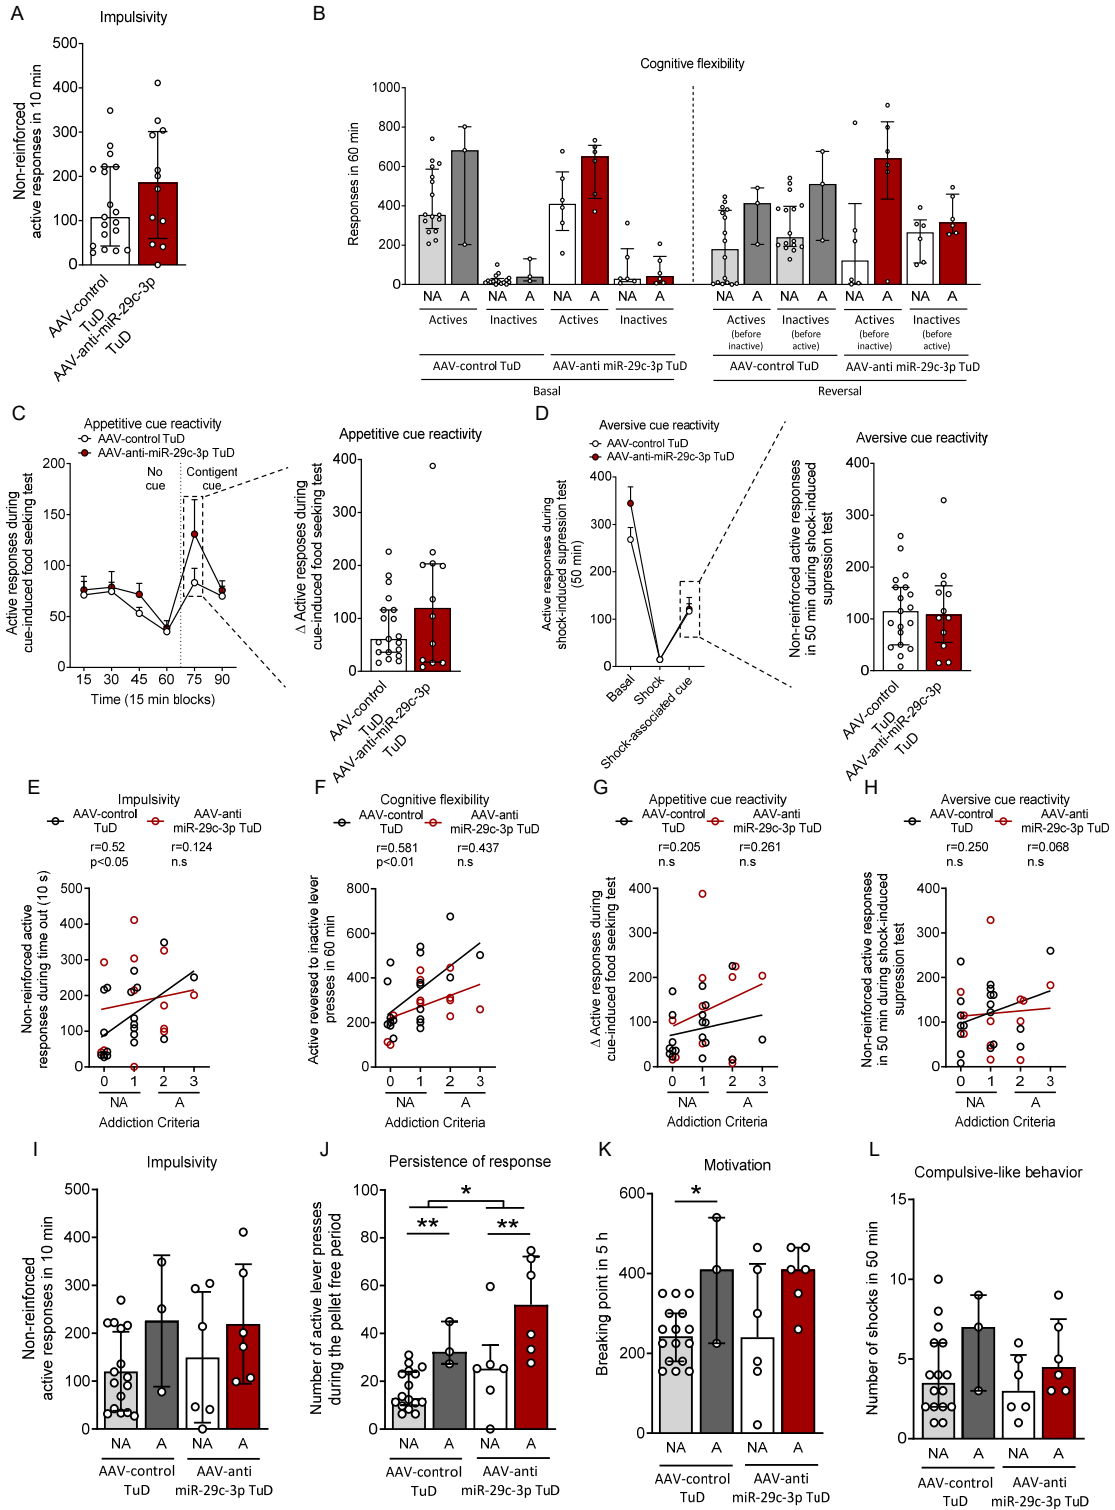

**Fig. S5. Characterization of phenotypic traits related to addiction in AAV-anti-mmu-miR-29c-3p TuD mice (A-D).** Behavioral test of AAV-anti-mmu-miR-29c-3p TuD mice regarding four phenotypic traits related to addiction. **(A)** Impulsivity. **(B)** Cognitive flexibility. **(C)** Appetitive cue-reactivity and **(D)** aversive cue-reactivity. **(E-H)** Pearson

correlations between individual addiction-like criteria and **(E)** impulsivity. **(F)** cognitive flexibility. **(G)** Appetitive cue-reactivity. **(H)** Aversive cue-reactivity. **(I-L)** Behavioral tests of impulsivity **(I)** and the three addiction-like criteria **(J)** persistence of response, **(K)** motivation, and **(L)** compulsive-like behavior in non-addicted (“NA”) and addicted (“A”) mice in both genotypes. Individual values and bars with median and the interquartile range (n=16 for Non-Addicted AAV-control TuD; n=3 for Addicted AAV-control TuD; n=6 for Non-Addicted AAV-anti-mmu-miR-29c-3p TuD mice and n=6 for AAV-anti-mmu-miR-29c-3p TuD mice). Statistical details are included in Table S12.

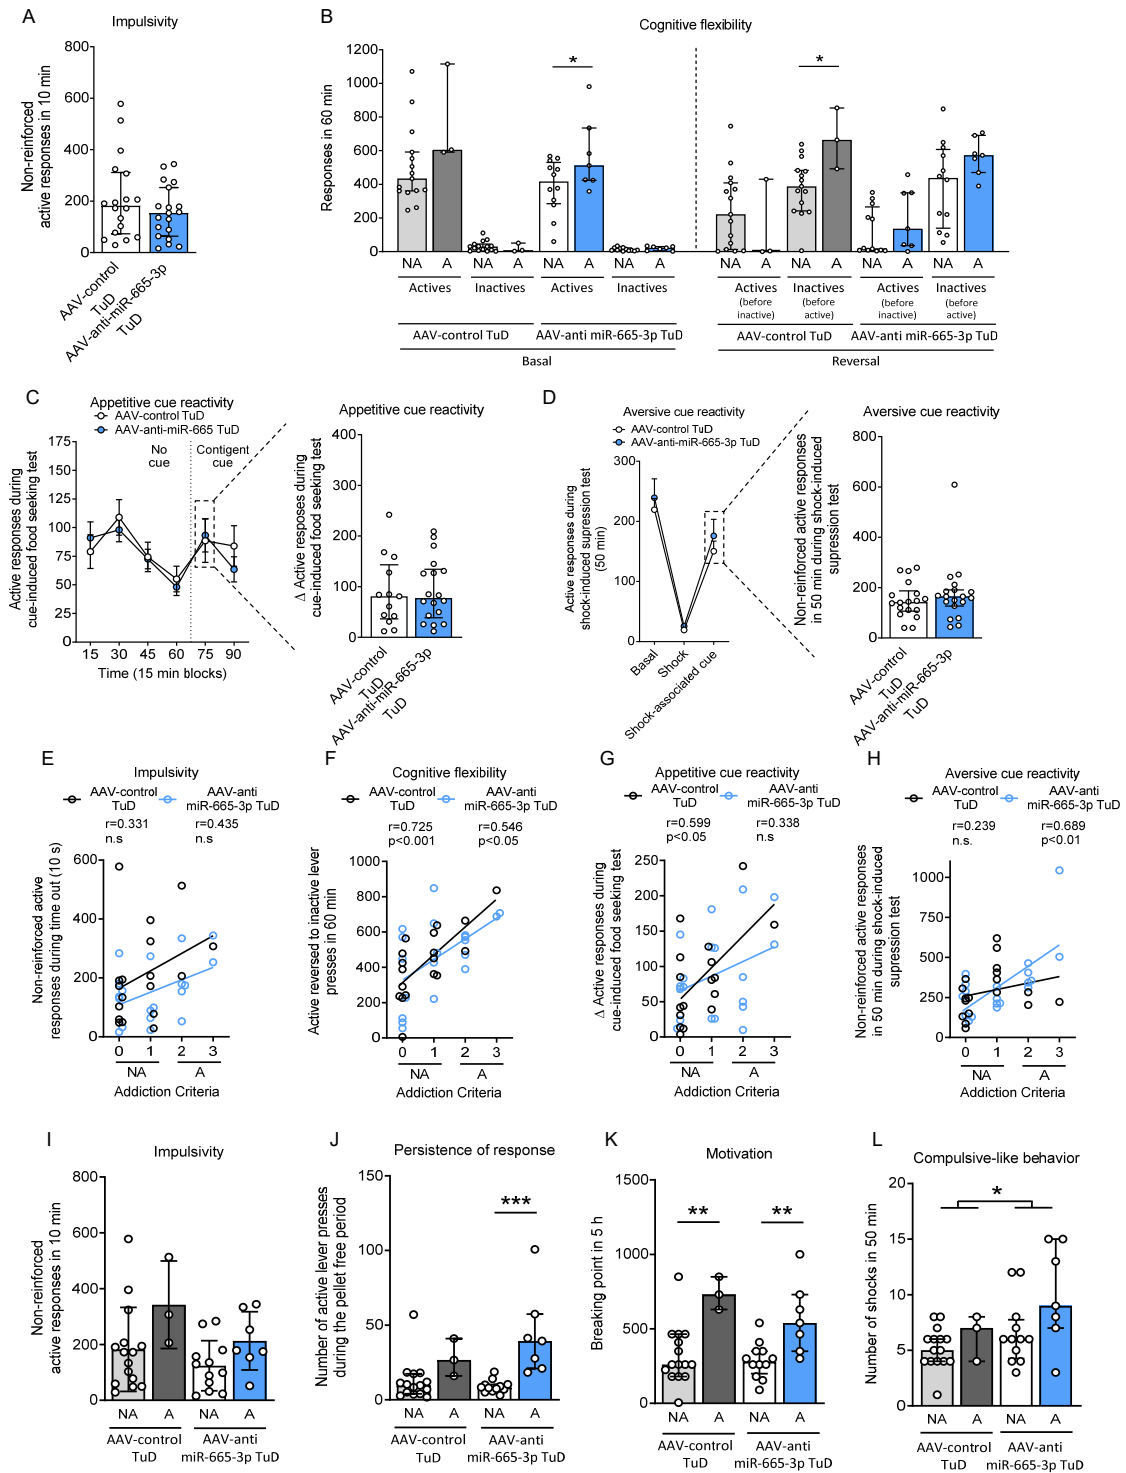

**Fig. S6. Characterization of phenotypic traits related to addiction in AAV-anti-mmu-miR-665-3p TuD mice (A-D).** Behavioral test of AAV-anti-mmu-miR-665-3p TuD mice regarding five phenotypic traits related to addiction. **(A)** Impulsivity. **(B)** Cognitive flexibility. **(C)** Appetitive cue-reactivity. **(D)** Aversive cue-reactivity. **(E-H)** Pearson

correlations between individual addiction-like criteria and **(E)** impulsivity, **(F)** cognitive flexibility, **(G)** appetitive cue-reactivity and **(H)** aversive cue-reactivity. **(I-L)** Behavioral tests of **(I)** impulsivity and the three addiction-like criteria **(J)** persistence of response, **(K)** motivation, and **(L)** compulsive-like behavior in non-addicted (NA) and addicted (A) mice in both genotypes. Individual values and bars with median and the interquartile range. (n=15 for Non-Addicted AAV-control TuD; n=3 for Addicted AAV-control TuD; n=12 for Non-Addicted AAV-anti-miR-665-3p TuD mice and n=7 for Addicted AAV-anti-miR-665-3p TuD mice). Statistical details are included in Table S13.

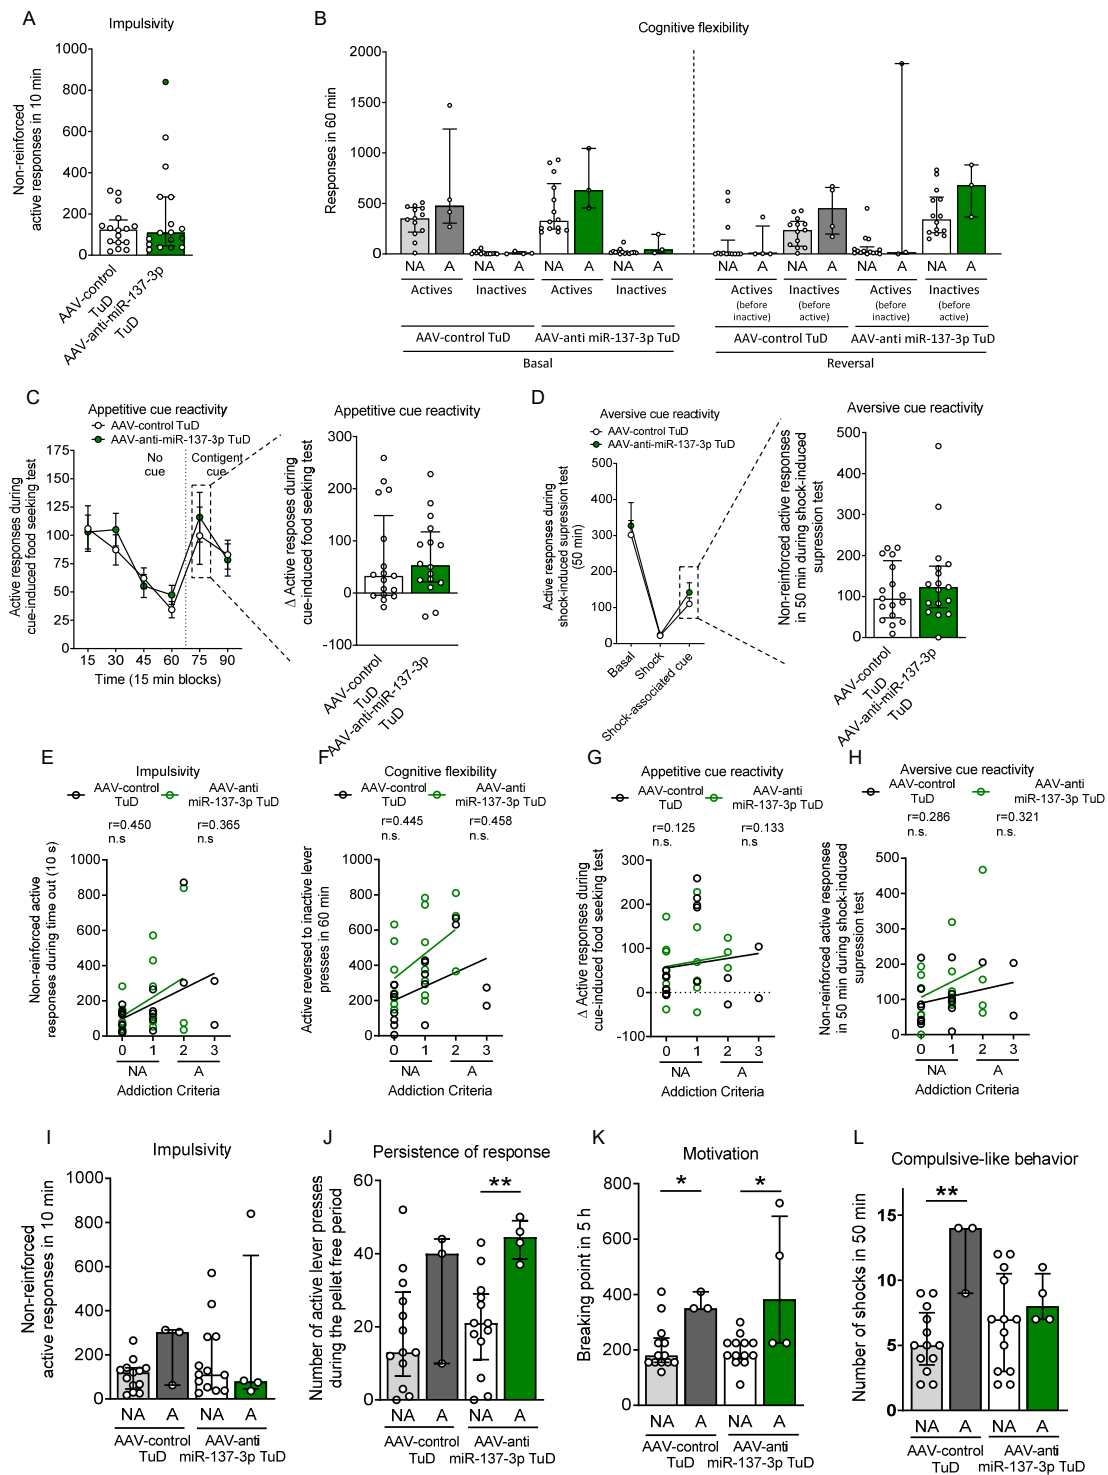

**Fig. S7. Characterization of phenotypic traits related to addiction in AAV-anti-mmu-miR-137-3p TuD mice (A-D).** Behavioral test of AAV-anti-mmu-miR-137-3p TuD mice regarding four phenotypic traits related to addiction. **(A)** Impulsivity. **(B)** Cognitive flexibility. **(C)** Appetitive cue-reactivity. **(D)** Aversive cue-reactivity. **(E-H)** Pearson

correlations between individual addiction-like criteria and impulsivity, **(F)** cognitive flexibility, **(G)** appetitive cue-reactivity, and **(H)** aversive cue-reactivity. **(I-L)** Behavioral tests of **(I)** impulsivity and the three addiction-like criteria **(J)** persistence of response, **(K)** motivation, and **(L)** compulsive-like behavior in non-addicted (NA) and addicted (A) mice in both genotypes. Individual values and bars with median and the interquartile range. (n=13 for Non-Addicted AAV-control TuD; n=3 for Addicted AAV-control TuD; n=13 for Non-Addicted AAV-anti-miR-137-3p TuD mice and n=4 for Addicted AAV-anti-miR-137-3p TuD mice). Statistical details are included in Table S14.

**Table S1.** Differences in miRNA expression in the mPFC between vulnerable and resilient mice from the discovery sample.

| Mature           | Chromosome | Start    | Stop     | Strand | Sequence                 | log2Fold Change | baseMean | baseMean_control | baseMean_treatment_files_1 | lfcSE | Stat  | Pvalue   | Padj FDR |
|------------------|------------|----------|----------|--------|--------------------------|-----------------|----------|------------------|----------------------------|-------|-------|----------|----------|
| mmu-miR-34c-3p   | chr9       | 51103044 | 51103065 | -      | AAUCACUAACCACACAGCCAGG   | 0.93            | 112.81   | 70.21            | 155.41                     | 0.25  | 3.67  | 2.40E-04 | 0.0991   |
| mmu-miR-876-5p   | chr4       | 36645422 | 36645443 | -      | UGGAUUUCUCUGUGAAUCACUA   | -0.89           | 18.51    | 25.15            | 11.88                      | 0.24  | -3.66 | 2.56E-04 | 0.0991   |
| mmu-miR-34b-3p   | chr9       | 51103574 | 51103595 | -      | AAUCACUAACUCCACUGCCAUC   | 0.81            | 325.18   | 216.72           | 433.64                     | 0.26  | 3.15  | 1.63E-03 | 0.2238   |
| mmu-miR-218-2-3p | chr11      | 35616882 | 35616903 | +      | CAUGGUUCUGUCAAGCACCGCG   | -0.55           | 63.80    | 76.93            | 50.68                      | 0.17  | -3.12 | 1.82E-03 | 0.2238   |
| mmu-miR-211-5p   | chr7       | 64205831 | 64205852 | +      | UUCUUUUGUCAUCCUUUGCCU    | -1.01           | 74.78    | 121.20           | 28.37                      | 0.33  | -3.08 | 2.05E-03 | 0.2238   |
| mmu-miR-872-5p   | chr4       | 94665167 | 94665187 | +      | AAGGUUACUUGUUAGUUCAGG    | 0.29            | 5410.54  | 4853.32          | 5967.75                    | 0.09  | 3.08  | 2.07E-03 | 0.2238   |
| mmu-miR-140-5p   | chr8       | 1.08E+08 | 1.08E+08 | +      | CAGUGGUUUUACCCUAUGGUAG   | 0.33            | 2407.84  | 2124.48          | 2691.19                    | 0.11  | 3.03  | 2.44E-03 | 0.2238   |
| mmu-miR-376a-3p  | chr12      | 1.1E+08  | 1.1E+08  | +      | AUCGUAGAGGAAAAUCCACGU    | -0.54           | 512.10   | 615.59           | 408.62                     | 0.18  | -2.98 | 2.89E-03 | 0.2238   |
| mmu-miR-137-5p   | chr3       | 1.18E+08 | 1.18E+08 | +      | ACGGGUUUUUGGGUGGAUAAU    | -0.40           | 141.45   | 161.95           | 120.95                     | 0.14  | -2.96 | 3.12E-03 | 0.2238   |
| mmu-miR-128-1-5p | chr1       | 1.28E+08 | 1.28E+08 | +      | CGGGCCGUAGCACUGUCUGA     | -0.38           | 447.22   | 508.58           | 385.87                     | 0.13  | -2.94 | 3.27E-03 | 0.2238   |
| mmu-miR-6538     | chr12      | 26414970 | 26414988 | -      | CGCGGGCUCCGGGGCGGCG      | 0.75            | 126.60   | 87.80            | 165.39                     | 0.25  | 2.94  | 3.31E-03 | 0.2238   |
| mmu-miR-329-5p   | chr12      | 1.1E+08  | 1.1E+08  | +      | AGAGGUUUUCUGGGUCUCUGUU   | -0.25           | 8487.62  | 9238.33          | 7736.91                    | 0.09  | -2.92 | 3.47E-03 | 0.2238   |
| mmu-miR-200a-5p  | chr4       | 1.56E+08 | 1.56E+08 | -      | CAUCUUACCGGACAGUCUGGA    | -0.90           | 53.50    | 92.42            | 14.58                      | 0.32  | -2.85 | 4.42E-03 | 0.2264   |
| mmu-miR-200b-5p  | chr4       | 1.56E+08 | 1.56E+08 | -      | CAUCUUACUGGGCAGCAUUGGA   | -0.83           | 33.14    | 61.59            | 4.69                       | 0.29  | -2.82 | 4.86E-03 | 0.2264   |
| mmu-miR-582-3p   | chr13      | 1.09E+08 | 1.09E+08 | +      | UAACCGUUGAACACUGAAC      | -0.24           | 2530.02  | 2739.95          | 2320.09                    | 0.08  | -2.80 | 5.07E-03 | 0.2264   |
| mmu-miR-126a-3p  | chr2       | 26591402 | 26591423 | +      | UCGUACCGUGAGUAAUAAUGCG   | 0.28            | 54193.49 | 48777.65         | 59609.33                   | 0.10  | 2.73  | 6.25E-03 | 0.2264   |
| mmu-miR-200a-3p  | chr4       | 1.56E+08 | 1.56E+08 | -      | UAACACUGUCUGGUAACGAUGU   | -0.81           | 6689.50  | 12115.47         | 1263.53                    | 0.30  | -2.73 | 6.36E-03 | 0.2264   |
| mmu-miR-182-5p   | chr6       | 30165962 | 30165986 | -      | UUUGGCAAUGGUAGAACUCACCCG | -0.80           | 2973.41  | 5424.59          | 522.23                     | 0.30  | -2.72 | 6.53E-03 | 0.2264   |
| mmu-miR-96-5p    | chr6       | 30169506 | 30169528 | -      | UUUGGCACUAGCACAUUUUUGCU  | -0.78           | 349.73   | 651.72           | 47.73                      | 0.29  | -2.70 | 6.93E-03 | 0.2264   |
| mmu-miR-10b-5p   | chr2       | 74726074 | 74726096 | +      | UACCCUGUAGAACCGAAUUUGUG  | 0.81            | 209.23   | 128.90           | 289.56                     | 0.30  | 2.70  | 6.93E-03 | 0.2264   |
| mmu-miR-34b-5p   | chr9       | 51103610 | 51103632 | -      | AGGCAGUGUAAUAGCUGAUUGU   | 0.74            | 350.86   | 239.21           | 462.50                     | 0.27  | 2.69  | 7.11E-03 | 0.2264   |
| mmu-miR-3085-3p  | chr19      | 42280095 | 42280115 | -      | UCUGGCUGCUAUGGCCCCUC     | -0.44           | 232.02   | 269.62           | 194.43                     | 0.16  | -2.68 | 7.31E-03 | 0.2264   |
| mmu-miR-467e-5p  | chr2       | 10505731 | 10505752 | +      | AUAAGUGUGAGCAUGUAUAUGU   | 0.50            | 43.16    | 35.11            | 51.21                      | 0.19  | 2.68  | 7.39E-03 | 0.2264   |
| mmu-miR-674-5p   | chr2       | 1.17E+08 | 1.17E+08 | +      | GCACUGAGAUGGGAGUGGUGUA   | -0.32           | 724.23   | 806.81           | 641.65                     | 0.12  | -2.67 | 7.57E-03 | 0.2264   |
| mmu-miR-429-3p   | chr4       | 1.56E+08 | 1.56E+08 | -      | UAAUACUGUCUGGUAUUGCCGU   | -0.80           | 749.37   | 1336.58          | 162.16                     | 0.30  | -2.67 | 7.66E-03 | 0.2264   |
| mmu-miR-184-3p   | chr9       | 89802263 | 89802284 | -      | UGGACGGAGAACUGUAAGGGU    | -0.66           | 499.76   | 634.17           | 365.35                     | 0.25  | -2.66 | 7.87E-03 | 0.2264   |
| mmu-miR-21a-5p   | chr11      | 86584120 | 86584141 | -      | UAGCUUAUCAGACUGAUUUGA    | 0.45            | 79349.18 | 66221.97         | 92476.39                   | 0.17  | 2.63  | 8.48E-03 | 0.2264   |
| mmu-miR-15b-3p   | chr3       | 69009813 | 69009834 | +      | CGAAUCAUUUUUGCUGCUCUA    | 0.78            | 19.39    | 12.38            | 26.40                      | 0.30  | 2.62  | 8.86E-03 | 0.2264   |
| mmu-miR-665-3p   | chr12      | 1.1E+08  | 1.1E+08  | +      | ACCAGGAGGCUGAGGUCCCU     | -0.34           | 337.76   | 379.45           | 296.07                     | 0.13  | -2.61 | 8.93E-03 | 0.2264   |
| mmu-miR-183-5p   | chr6       | 30169711 | 30169732 | -      | UAUGGCACUGGUAGAAUUCACU   | -0.76           | 2435.61  | 4422.68          | 448.55                     | 0.29  | -2.61 | 9.08E-03 | 0.2264   |



|                         |       |          |          |   |                          |       |          |          |          |      |       |          |        |
|-------------------------|-------|----------|----------|---|--------------------------|-------|----------|----------|----------|------|-------|----------|--------|
| <b>mmu-miR-200c-3p</b>  | chr6  | 1.25E+08 | 1.25E+08 | - | UAAUACUGCCGGGUAUGAUGGA   | -0.75 | 406.70   | 743.48   | 69.91    | 0.29 | -2.60 | 9.32E-03 | 0.2264 |
| <b>mmu-miR-27a-3p</b>   | chr8  | 84208727 | 84208747 | + | UUCACAGUGGCUAAGUCCGC     | 0.37  | 8858.64  | 7686.93  | 10030.36 | 0.14 | 2.60  | 9.36E-03 | 0.2264 |
| <b>mmu-miR-200b-3p</b>  | chr4  | 1.56E+08 | 1.56E+08 | - | UAAUACUGCCUGGUAUGAUGA    | -0.79 | 2581.44  | 4435.06  | 727.83   | 0.31 | -2.55 | 1.08E-02 | 0.2459 |
| <b>mmu-miR-375-3p</b>   | chr1  | 74900661 | 74900682 | - | UUUGUUCGUUCGGCUCGCGUGA   | 0.58  | 821.61   | 633.42   | 1009.80  | 0.23 | 2.55  | 1.08E-02 | 0.2459 |
| <b>mmu-miR-185-5p</b>   | chr16 | 18327438 | 18327459 | - | UGGAGAGAAAGGCAGUCCUGA    | -0.18 | 24353.19 | 25858.06 | 22848.33 | 0.07 | -2.48 | 1.31E-02 | 0.2897 |
| <b>mmu-miR-34c-5p</b>   | chr9  | 51103076 | 51103098 | - | AGGCAGUGUAGUUAGCUGAUUGC  | 0.71  | 17937.55 | 12110.02 | 23765.09 | 0.29 | 2.45  | 1.42E-02 | 0.2974 |
| <b>mmu-miR-29b-2-5p</b> | chr1  | 1.95E+08 | 1.95E+08 | + | CUGGUUUCACAUGGUGGCUUAGAU | -0.27 | 529.49   | 580.86   | 478.12   | 0.11 | -2.45 | 1.45E-02 | 0.2974 |
| <b>mmu-miR-5108</b>     | chr10 | 61774795 | 61774813 | + | GUAGAGCACUGGAUGGUUU      | 0.80  | 15.18    | 7.73     | 22.63    | 0.33 | 2.44  | 1.46E-02 | 0.2974 |

**Table S2.** Differences in miRNA expression in the mPFC between vulnerable and resilient mice from the replica sample.

| Mature            | Chromosome | Start    | Stop     | Strand | Sequence                | log2Fold Change | baseMean | baseMean_control | baseMean_treatment_files_1 | lfcSE | Stat  | Pvalue   | Padj FDR |
|-------------------|------------|----------|----------|--------|-------------------------|-----------------|----------|------------------|----------------------------|-------|-------|----------|----------|
| mmu-miR-764-3p    | chrX       | 1.47E+08 | 1.47E+08 | +      | AGGAGGCCAUAGUGGCAACUGU  | -0.79           | 10.51    | 14.83            | 6.19                       | 0.23  | -3.41 | 6.45E-04 | 0.196    |
| mmu-miR-322-5p    | chrX       | 53054306 | 53054327 | -      | CAGCAGCAAUUCAUGUUUUGGA  | -0.47           | 102.13   | 120.23           | 84.04                      | 0.14  | -3.34 | 8.38E-04 | 0.196    |
| mmu-miR-223-3p    | chrX       | 96242884 | 96242905 | +      | UGUCAGUUUGUCAAAUACCCCA  | -0.75           | 34.25    | 47.45            | 21.04                      | 0.23  | -3.29 | 1.01E-03 | 0.196    |
| mmu-miR-362-3p    | chrX       | 7241984  | 7242005  | -      | AACACACCCUGUUAAGGAUUCA  | -0.54           | 133.06   | 161.52           | 104.61                     | 0.16  | -3.28 | 1.05E-03 | 0.196    |
| mmu-miR-3085-3p   | chr19      | 42280095 | 42280115 | -      | UCUGGCUGCUAUGGCCCCUC    | -0.55           | 239.47   | 292.99           | 185.95                     | 0.18  | -3.11 | 1.88E-03 | 0.272    |
| mmu-miR-30b-5p    | chr15      | 68337469 | 68337490 | -      | UGUAAACAUCUACACUCAGCU   | -0.47           | 5804.13  | 6869.27          | 4738.99                    | 0.15  | -3.05 | 2.32E-03 | 0.272    |
| mmu-miR-7a-1-3p   | chr13      | 58392800 | 58392821 | -      | CAACAAAUCACAGUCUGCCAUA  | -0.49           | 181.71   | 216.30           | 147.12                     | 0.16  | -3.02 | 2.55E-03 | 0.272    |
| mmu-miR-532-5p    | chrX       | 7248456  | 7248477  | -      | CAUGCCUUGAGUGUAGGACCGU  | 0.29            | 5703.96  | 5097.28          | 6310.64                    | 0.10  | 2.90  | 3.68E-03 | 0.273    |
| mmu-miR-15a-3p    | chr14      | 61632038 | 61632059 | -      | CAGGCCAUACUGUGCUGCCUCA  | -0.56           | 30.54    | 37.80            | 23.27                      | 0.20  | -2.89 | 3.81E-03 | 0.273    |
| mmu-miR-3071-3p   | chr12      | 1.1E+08  | 1.1E+08  | -      | AUCAUAAAACAAAUGGAGUCC   | 0.25            | 2216.12  | 2019.22          | 2413.01                    | 0.09  | 2.88  | 3.92E-03 | 0.273    |
| mmu-miR-7015-3p   | chr4       | 1.21E+08 | 1.21E+08 | -      | UCUCACUGUCCUCUGCACUAG   | 0.42            | 70.41    | 59.18            | 81.64                      | 0.15  | 2.88  | 4.03E-03 | 0.273    |
| mmu-miR-665-3p    | chr12      | 1.1E+08  | 1.1E+08  | +      | ACCAGGAGGCUGAGGUCCCU    | -0.47           | 300.46   | 356.86           | 244.06                     | 0.17  | -2.82 | 4.88E-03 | 0.291    |
| mmu-miR-125b-1-3p | chr9       | 41581980 | 41582001 | +      | ACGGGUUAGGCUCUUGGGAGCU  | 0.22            | 1128.14  | 1038.34          | 1217.95                    | 0.08  | 2.77  | 5.69E-03 | 0.291    |
| mmu-miR-205-5p    | chr1       | 1.94E+08 | 1.94E+08 | -      | UCCUUCAUUCACCCGGAGUCUG  | -0.58           | 24.60    | 31.41            | 17.79                      | 0.21  | -2.74 | 6.10E-03 | 0.291    |
| mmu-miR-324-3p    | chr11      | 70012095 | 70012114 | +      | CCACUGCCCCAGGUGCUGCU    | -0.38           | 344.12   | 393.42           | 294.82                     | 0.14  | -2.74 | 6.18E-03 | 0.291    |
| mmu-miR-671-5p    | chr5       | 24592132 | 24592154 | +      | AGGAAGCCUGGAGGGCUGGAG   | -0.40           | 155.59   | 179.79           | 131.40                     | 0.15  | -2.62 | 8.72E-03 | 0.291    |
| mmu-miR-1966-3p   | chr8       | 1.06E+08 | 1.06E+08 | +      | UUUCUGACUCAACUCUCCUUAG  | 0.57            | 14.19    | 10.20            | 18.18                      | 0.22  | 2.61  | 8.98E-03 | 0.291    |
| mmu-miR-369-3p    | chr12      | 1.1E+08  | 1.1E+08  | +      | AAUAAUACAUGGUUGAUCUUU   | -0.37           | 9666.76  | 11044.99         | 8288.53                    | 0.14  | -2.61 | 9.10E-03 | 0.291    |
| mmu-miR-5617-3p   | chrX       | 20863126 | 20863146 | -      | CAGGCGGCCUCAGCUCUCACU   | 0.58            | 11.52    | 8.06             | 14.97                      | 0.23  | 2.59  | 9.57E-03 | 0.291    |
| mmu-miR-425-5p    | chr9       | 1.09E+08 | 1.09E+08 | +      | AAUGACACGAUCACUCCGUUGA  | -0.19           | 765.14   | 815.25           | 715.02                     | 0.07  | -2.57 | 1.01E-02 | 0.291    |
| mmu-miR-339-5p    | chr5       | 1.39E+08 | 1.39E+08 | -      | UCCUGUCCUCCAGGAGCUCACG  | -0.35           | 891.08   | 1011.06          | 771.09                     | 0.14  | -2.55 | 1.07E-02 | 0.291    |
| mmu-miR-532-3p    | chrX       | 7248419  | 7248440  | -      | CCUCCACACCCAAGGCUUGCA   | -0.42           | 167.92   | 196.01           | 139.82                     | 0.17  | -2.55 | 1.09E-02 | 0.291    |
| mmu-miR-99b-3p    | chr17      | 17830232 | 17830253 | +      | CAAGCUCGUGUCUGGGUCCG    | 0.19            | 1148.51  | 1069.77          | 1227.25                    | 0.08  | 2.55  | 1.09E-02 | 0.291    |
| mmu-miR-129-5p    | chr2       | 94241419 | 94241439 | -      | CUUUUUGCGGUCUGGGUUGC    | 0.32            | 631.42   | 556.69           | 706.15                     | 0.12  | 2.54  | 1.11E-02 | 0.291    |
| mmu-miR-15b-5p    | chr3       | 69009775 | 69009796 | +      | UAGCAGCACAUCAUGGUUUACA  | -0.40           | 84.43    | 97.78            | 71.08                      | 0.16  | -2.54 | 1.12E-02 | 0.291    |
| mmu-miR-107-3p    | chr19      | 34820700 | 34820722 | -      | AGCAGCAUUGUACAGGGCUAUCA | -0.46           | 1533.63  | 1831.02          | 1236.25                    | 0.18  | -2.52 | 1.16E-02 | 0.291    |
| mmu-miR-212-5p    | chr11      | 75173403 | 75173425 | +      | ACCUUGGCUCUAGACUGCUUACU | 0.31            | 10166.02 | 8986.87          | 11345.17                   | 0.12  | 2.52  | 1.16E-02 | 0.291    |
| mmu-miR-29b-3p    | chr1       | 1.95E+08 | 1.95E+08 | +      | UAGCACAAUUUGAAUACAGUGUU | -0.26           | 3314.85  | 3629.35          | 3000.35                    | 0.10  | -2.52 | 1.18E-02 | 0.291    |
| mmu-miR-673-3p    | chr12      | 1.1E+08  | 1.1E+08  | +      | UCCGGGGCUGAGUUCUGACC    | 0.31            | 198.08   | 174.62           | 221.54                     | 0.12  | 2.52  | 1.19E-02 | 0.291    |
| mmu-miR-301b-3p   | chr16      | 17124420 | 17124442 | -      | CAGUGCAAUGGUUUGUCAAAAGC | -0.54           | 12.64    | 15.93            | 9.36                       | 0.22  | -2.51 | 1.22E-02 | 0.291    |
| mmu-miR-344h-3p   | chr7       | 61742366 | 61742387 | -      | GGUAUAACCAAAGCCGACUGU   | -0.59           | 9.22     | 12.47            | 5.98                       | 0.24  | -2.50 | 1.25E-02 | 0.291    |
| mmu-miR-384-3p    | chrX       | 1.05E+08 | 1.05E+08 | -      | AUUCUAGAAUUGUUCACAAU    | -0.26           | 2062.79  | 2257.06          | 1868.51                    | 0.10  | -2.50 | 1.25E-02 | 0.291    |

|                 |       |          |          |   |                         |       |           |           |           |      |       |          |       |
|-----------------|-------|----------|----------|---|-------------------------|-------|-----------|-----------|-----------|------|-------|----------|-------|
| mmu-miR-3552    | chrX  | 1.47E+08 | 1.47E+08 | + | AGGUCGACAGCCACUCCCU     | -0.48 | 77.20     | 93.12     | 61.29     | 0.19 | -2.48 | 1.30E-02 | 0.294 |
| mmu-miR-29c-3p  | chr1  | 1.95E+08 | 1.95E+08 | + | UAGCACAAUUGAAUUGGUUA    | -0.35 | 2060.52   | 2336.75   | 1784.29   | 0.14 | -2.46 | 1.39E-02 | 0.303 |
| mmu-miR-350-3p  | chr1  | 1.77E+08 | 1.77E+08 | - | UUCACAAAGCCCAUACACUUUC  | -0.49 | 197.39    | 239.84    | 154.94    | 0.20 | -2.45 | 1.42E-02 | 0.303 |
| mmu-miR-497a-5p | chr11 | 70234730 | 70234751 | + | CAGCAGCACACUGUGUUUGUA   | -0.34 | 550.41    | 621.76    | 479.05    | 0.14 | -2.42 | 1.56E-02 | 0.317 |
| mmu-miR-30a-3p  | chr1  | 23272315 | 23272336 | + | CUUUCAGUCGGAUGUUUGCAGC  | 0.23  | 6632.13   | 6077.69   | 7186.58   | 0.10 | 2.41  | 1.58E-02 | 0.317 |
| mmu-miR-487b-3p | chr12 | 1.1E+08  | 1.1E+08  | + | AAUCGUACAGGGUCAUCCACUU  | -0.22 | 4314.35   | 4653.00   | 3975.70   | 0.09 | -2.40 | 1.62E-02 | 0.317 |
| mmu-miR-296-5p  | chr2  | 1.74E+08 | 1.74E+08 | - | AGGGCCCCCUCAUCCUGU      | -0.50 | 283.77    | 348.09    | 219.45    | 0.21 | -2.40 | 1.66E-02 | 0.317 |
| mmu-miR-674-3p  | chr2  | 1.17E+08 | 1.17E+08 | + | CACAGCUCCAUCUCAGAACA    | 0.39  | 4375.34   | 3694.44   | 5056.24   | 0.16 | 2.38  | 1.73E-02 | 0.317 |
| mmu-miR-324-5p  | chr11 | 70012060 | 70012082 | + | CGCAUCCCUAGGGCAUUGGUGU  | -0.38 | 253.32    | 291.29    | 215.36    | 0.16 | -2.38 | 1.74E-02 | 0.317 |
| mmu-miR-1198-5p | chrX  | 7807142  | 7807163  | + | UAUGUGUUCUGGCUUGGCUUGG  | 0.26  | 2621.91   | 2370.06   | 2873.76   | 0.11 | 2.37  | 1.79E-02 | 0.318 |
| mmu-miR-409-3p  | chr12 | 1.1E+08  | 1.1E+08  | + | GAAUGUUGCUCGGUGAACCCCU  | 0.22  | 7198.65   | 6625.21   | 7772.10   | 0.09 | 2.35  | 1.85E-02 | 0.319 |
| mmu-miR-770-5p  | chr12 | 1.1E+08  | 1.1E+08  | + | AGCACCACGUGUCUGGGCCACG  | -0.38 | 1906.63   | 2189.69   | 1623.57   | 0.16 | -2.35 | 1.88E-02 | 0.319 |
| mmu-miR-434-5p  | chr12 | 1.1E+08  | 1.1E+08  | + | GCUCGACUCAUGGUUUGAACCA  | 0.19  | 27895.26  | 26053.65  | 29736.87  | 0.08 | 2.34  | 1.93E-02 | 0.320 |
| mmu-miR-5106    | chr4  | 44221197 | 44221219 | - | AGGUCUGUAGCUCAGUUGGCAGA | 0.46  | 299.82    | 105.13    | 494.52    | 0.20 | 2.33  | 2.01E-02 | 0.325 |
| mmu-miR-29a-3p  | chr6  | 31062673 | 31062694 | - | UAGCACCAUCUGAAUUGGUUA   | -0.23 | 184508.74 | 199737.34 | 169280.13 | 0.10 | -2.32 | 2.05E-02 | 0.325 |
| hsa-miR-4443    | chr3  | 48196572 | 48196588 | + | UUGGAGGCGUGGGUUUU       | 0.52  | 1085.89   | 794.96    | 1376.81   | 0.23 | 2.29  | 2.19E-02 | 0.337 |
| mmu-miR-153-5p  | chr12 | 1.17E+08 | 1.17E+08 | + | UUUGUGACGUUGCAGCU       | 0.20  | 334.92    | 311.10    | 358.73    | 0.09 | 2.28  | 2.24E-02 | 0.337 |
| mmu-miR-342-3p  | chr12 | 1.09E+08 | 1.09E+08 | + | UCUCACACAGAAUUGCACC CGU | -0.34 | 2793.95   | 3160.09   | 2427.81   | 0.15 | -2.28 | 2.26E-02 | 0.337 |
| mmu-miR-874-3p  | chr13 | 58023135 | 58023156 | - | CUGCCUGGCCCGAGGGACCGA   | -0.20 | 1956.34   | 2096.91   | 1815.77   | 0.09 | -2.27 | 2.35E-02 | 0.343 |
| mmu-miR-154-3p  | chr12 | 1.1E+08  | 1.1E+08  | + | AAUCAUACACGGUUGACCUAUU  | -0.39 | 300.86    | 349.12    | 252.60    | 0.17 | -2.26 | 2.39E-02 | 0.343 |
| mmu-miR-361-5p  | chrX  | 1.13E+08 | 1.13E+08 | - | UUAUCAGAAUCCAGGGGUAC    | -0.30 | 2549.36   | 2839.91   | 2258.81   | 0.13 | -2.24 | 2.49E-02 | 0.343 |
| mmu-miR-1981-5p | chr1  | 1.85E+08 | 1.85E+08 | - | GUAAAGGCUGGGUUAGACGUGGC | 0.35  | 1404.92   | 1215.52   | 1594.33   | 0.15 | 2.24  | 2.49E-02 | 0.343 |
| mmu-miR-100-5p  | chr9  | 41531437 | 41531458 | + | AACCCGUAGAUCGAACUUGUG   | 0.29  | 59293.02  | 52784.51  | 65801.53  | 0.13 | 2.22  | 2.62E-02 | 0.343 |
| mmu-miR-1839-3p | chr7  | 81529958 | 81529980 | + | AGACCUACUUAUCUACCAACAGC | -0.34 | 179.94    | 203.57    | 156.30    | 0.15 | -2.20 | 2.78E-02 | 0.343 |
| mmu-miR-679-5p  | chr12 | 1.1E+08  | 1.1E+08  | + | GGACUGUGAGGUGACUCUUGGU  | 0.37  | 42.55     | 36.05     | 49.05     | 0.17 | 2.20  | 2.80E-02 | 0.343 |
| mmu-miR-192-5p  | chr19 | 6264857  | 6264877  | + | CUGACCUAUGAAUUGACAGCC   | 0.25  | 2508.12   | 2282.71   | 2733.53   | 0.11 | 2.19  | 2.83E-02 | 0.343 |
| mmu-miR-103-3p  | chr2  | 1.31E+08 | 1.31E+08 | + | AGCAGCAUUGUACAGGGCUAUGA | -0.33 | 16820.38  | 18998.17  | 14642.59  | 0.15 | -2.18 | 2.95E-02 | 0.343 |
| mmu-miR-149-3p  | chr1  | 92850421 | 92850442 | + | GAGGGAGGGACGGGGGGGUGC   | 0.51  | 7.77      | 5.49      | 10.04     | 0.23 | 2.17  | 3.04E-02 | 0.343 |
| mmu-miR-190a-5p | chr9  | 67236700 | 67236721 | - | UGAUUUGUUUGAUUUAUUGGU   | -0.37 | 144.31    | 165.86    | 122.76    | 0.17 | -2.16 | 3.05E-02 | 0.343 |
| mmu-miR-99b-5p  | chr17 | 17830194 | 17830215 | + | CACCCGUAGAACCAGCCUUGCG  | 0.21  | 27910.63  | 25793.70  | 30027.57  | 0.10 | 2.16  | 3.05E-02 | 0.343 |
| mmu-miR-27b-5p  | chr13 | 63300718 | 63300739 | + | AGAGCUUAGCUGAUUGGUGAAC  | 0.27  | 115.23    | 103.83    | 126.63    | 0.13 | 2.16  | 3.09E-02 | 0.343 |
| mmu-miR-544-5p  | chr12 | 1.1E+08  | 1.1E+08  | + | UCUUGUAAAAAGCAGAGUCU    | -0.42 | 38.91     | 46.05     | 31.76     | 0.19 | -2.16 | 3.10E-02 | 0.343 |
| mmu-miR-383-5p  | chr8  | 38252178 | 38252199 | - | AGAUCAGAAGGUGACUGGGCU   | 0.18  | 11175.54  | 10461.11  | 11889.98  | 0.08 | 2.16  | 3.11E-02 | 0.343 |
| mmu-miR-30e-3p  | chr4  | 1.21E+08 | 1.21E+08 | - | CUUUCAGUCGGAUGUUUACAGC  | 0.24  | 5572.33   | 5088.40   | 6056.26   | 0.11 | 2.15  | 3.12E-02 | 0.343 |
| mmu-miR-7224-3p | chr2  | 67675496 | 67675516 | + | UCCACUGAGAGGACCACCCAC   | 0.30  | 129.25    | 114.44    | 144.07    | 0.14 | 2.15  | 3.15E-02 | 0.343 |
| mmu-miR-137-3p  | chr3  | 1.18E+08 | 1.18E+08 | + | UUAUUGCUAAGAAUACGCGUAG  | -0.36 | 7006.74   | 8018.38   | 5995.11   | 0.17 | -2.15 | 3.15E-02 | 0.343 |

|                  |       |          |          |   |                          |       |           |           |           |      |       |          |       |
|------------------|-------|----------|----------|---|--------------------------|-------|-----------|-----------|-----------|------|-------|----------|-------|
| mmu-miR-129-2-3p | chr2  | 94241376 | 94241397 | - | AAGCCUUACCCAAAAAGCAU     | -0.43 | 4414.95   | 5263.70   | 3566.21   | 0.20 | -2.14 | 3.20E-02 | 0.343 |
| mmu-miR-1964-3p  | chr7  | 29773344 | 29773365 | + | CCGACUUCUGGGUCUCCGGCUUU  | 0.39  | 119.49    | 100.33    | 138.64    | 0.18 | 2.14  | 3.23E-02 | 0.343 |
| mmu-miR-124-3p   | chr3  | 17795723 | 17795742 | + | UAAGGCACGCGGUGAAUGCC     | -0.22 | 77118.81  | 83266.03  | 70971.59  | 0.10 | -2.14 | 3.26E-02 | 0.343 |
| mmu-miR-370-5p   | chr12 | 1.1E+08  | 1.1E+08  | + | CAGGUCACGUCUCUGCAGUU     | 0.15  | 2789.59   | 2641.15   | 2938.04   | 0.07 | 2.13  | 3.35E-02 | 0.347 |
| mmu-miR-145a-5p  | chr18 | 61647866 | 61647888 | - | GUCCAGUUUUUCCAGGAUCCCU   | -0.47 | 2541.55   | 3148.75   | 1934.35   | 0.22 | -2.11 | 3.45E-02 | 0.347 |
| mmu-miR-3072-3p  | chr12 | 1.1E+08  | 1.1E+08  | + | UGCCCCUCCAGGAAGCCUUCU    | -0.40 | 115.77    | 135.65    | 95.89     | 0.19 | -2.11 | 3.47E-02 | 0.347 |
| mmu-miR-543-3p   | chr12 | 1.1E+08  | 1.1E+08  | + | AAACAUUCGCGGUGCACUUCU    | 0.26  | 13502.64  | 12216.54  | 14788.73  | 0.12 | 2.11  | 3.49E-02 | 0.347 |
| mmu-miR-544-3p   | chr12 | 1.1E+08  | 1.1E+08  | + | AUUCUGCAUUUUUAGCAAGCUC   | -0.40 | 45.85     | 53.65     | 38.05     | 0.19 | -2.08 | 3.74E-02 | 0.348 |
| mmu-miR-211-5p   | chr7  | 64205831 | 64205852 | + | UUCUUUGUCAUCCUUUGCCU     | -0.49 | 67.45     | 93.08     | 41.83     | 0.24 | -2.07 | 3.81E-02 | 0.348 |
| mmu-miR-541-5p   | chr12 | 1.1E+08  | 1.1E+08  | + | AAGGGAUUCUGAUGUUGGUCACAC | 0.22  | 29095.39  | 26750.92  | 31439.87  | 0.11 | 2.07  | 3.84E-02 | 0.348 |
| mmu-miR-146b-5p  | chr19 | 46342790 | 46342811 | + | UGAGAACUGAAUCCAAGGCU     | 0.22  | 8780.42   | 8066.18   | 9494.66   | 0.11 | 2.07  | 3.85E-02 | 0.348 |
| mmu-miR-574-3p   | chr5  | 64970364 | 64970385 | + | CACGCUAUGCACACCCACA      | -0.37 | 128.61    | 148.10    | 109.13    | 0.18 | -2.07 | 3.87E-02 | 0.348 |
| mmu-miR-501-3p   | chrX  | 7241270  | 7241291  | - | AAUGCACCCGGCAAGGAUUUG    | 0.21  | 1050.86   | 969.22    | 1132.50   | 0.10 | 2.06  | 3.91E-02 | 0.348 |
| mmu-miR-30d-5p   | chr15 | 68341257 | 68341278 | - | UGUAAACAUCCCGACUGGAAG    | 0.18  | 113979.10 | 106465.06 | 121493.14 | 0.09 | 2.06  | 3.91E-02 | 0.348 |
| mmu-miR-876-5p   | chr4  | 36645422 | 36645443 | - | UGGAUUUCUGUGAAUCACUA     | -0.44 | 15.09     | 18.05     | 12.12     | 0.21 | -2.06 | 3.93E-02 | 0.348 |
| mmu-miR-7b-3p    | chr17 | 56243055 | 56243076 | + | CAACAAGUCACGCCAGCCUCA    | -0.40 | 22.99     | 26.84     | 19.14     | 0.19 | -2.06 | 3.94E-02 | 0.348 |
| mmu-miR-23a-3p   | chr8  | 84208563 | 84208583 | + | AUCACAUUGCCAGGGAUUUCC    | -0.28 | 4456.71   | 4932.33   | 3981.08   | 0.14 | -2.05 | 4.00E-02 | 0.348 |
| mmu-miR-664-3p   | chr1  | 1.85E+08 | 1.85E+08 | + | UAUUCAUUUACUCCCGCCUA     | -0.31 | 1066.18   | 1196.30   | 936.05    | 0.15 | -2.04 | 4.14E-02 | 0.348 |
| mmu-miR-122-5p   | chr18 | 65248866 | 65248887 | + | UGGAGUGUGACAAUGGUGUUUG   | 0.29  | 114.01    | 101.51    | 126.51    | 0.14 | 2.04  | 4.16E-02 | 0.348 |
| mmu-miR-326-3p   | chr7  | 99552328 | 99552348 | + | CCUCUGGGCCUCCUCCAGU      | -0.32 | 1126.14   | 1268.71   | 983.58    | 0.16 | -2.04 | 4.18E-02 | 0.348 |
| mmu-miR-6540-3p  | chr16 | 42303386 | 42303406 | - | UCUGAAGCUUGCUUACCUCCA    | -0.41 | 17.45     | 20.54     | 14.35     | 0.20 | -2.03 | 4.21E-02 | 0.348 |
| mmu-let-7a-2-3p  | chr9  | 41536777 | 41536797 | + | CUGUACAGCCUCCUAGCUUUC    | -0.43 | 14.66     | 17.66     | 11.67     | 0.21 | -2.03 | 4.22E-02 | 0.348 |
| mmu-miR-376b-3p  | chr12 | 1.1E+08  | 1.1E+08  | + | AUCAUAGAGGAACAUCACUU     | -0.23 | 5684.38   | 6157.18   | 5211.59   | 0.11 | -2.03 | 4.24E-02 | 0.348 |
| mmu-miR-194-5p   | chr19 | 6264658  | 6264679  | + | UGUAAACAGCAACUCCAUGUGGA  | -0.25 | 1525.31   | 1666.48   | 1384.14   | 0.12 | -2.02 | 4.36E-02 | 0.354 |
| mmu-miR-99a-5p   | chr16 | 77598940 | 77598961 | + | AACCCGUAGAUCCGAUCUUGUG   | 0.23  | 168217.84 | 153641.40 | 182794.28 | 0.12 | 2.01  | 4.47E-02 | 0.359 |
| mmu-miR-126b-5p  | chr2  | 26591399 | 26591420 | - | AUUUUUACUCACGUAACGAGUU   | 0.23  | 171.83    | 157.54    | 186.12    | 0.11 | 2.00  | 4.60E-02 | 0.361 |
| mmu-miR-344-5p   | chr7  | 61940073 | 61940098 | - | AGUCAGGCCUCCUGGCUAGAUCCA | -0.47 | 5.40      | 7.16      | 3.64      | 0.24 | -1.99 | 4.62E-02 | 0.361 |
| mmu-miR-154-5p   | chr12 | 1.1E+08  | 1.1E+08  | + | UAGGUUAUCCGUGUUGCCUUCG   | -0.26 | 1068.28   | 1174.09   | 962.46    | 0.13 | -1.99 | 4.67E-02 | 0.361 |
| mmu-miR-325-5p   | chrX  | 1.05E+08 | 1.05E+08 | - | CCUAGUAGGUGCUCAGUAAGUGU  | 0.20  | 1067.44   | 992.30    | 1142.58   | 0.10 | 1.99  | 4.69E-02 | 0.361 |
| mmu-miR-935      | chr7  | 3415120  | 3415143  | + | CCCAGUUACCGUUCGCUACCGC   | -0.30 | 338.73    | 378.39    | 299.07    | 0.15 | -1.96 | 4.96E-02 | 0.365 |
| mmu-miR-195a-5p  | chr11 | 70235062 | 70235082 | + | UAGCAGCACAGAAUUAUUGGC    | -0.25 | 684.45    | 749.87    | 619.04    | 0.13 | -1.96 | 4.98E-02 | 0.365 |
| mmu-miR-101a-5p  | chr4  | 1.01E+08 | 1.01E+08 | - | UCAGUUUACAGUGCUGAUGC     | -0.39 | 21.48     | 25.28     | 17.69     | 0.20 | -1.96 | 4.99E-02 | 0.365 |

**Table S3.** RNA-seq p-values of the target genes of the three selected miRNAs.

| Target Genes for miR-665-3p |                |         | Target genes for miR-29c-3p |                |         | Target genes for miR-137-3p |                |          |
|-----------------------------|----------------|---------|-----------------------------|----------------|---------|-----------------------------|----------------|----------|
| Target Gene                 | RNAseq P-Value |         | Target Gene                 | RNAseq P-Value |         | Target Gene                 | RNAseq P-Value |          |
|                             | Discovery      | Replica |                             | Discovery      | Replica |                             | Discovery      | Replica  |
| <i>Iqcg</i>                 | 3.00E-04       | 0.7583  | <i>Mfap2</i>                | 8.70E-05       | 0.8638  | <i>March9</i>               | 3.01E-04       | 0.5005   |
| <i>Slc2a4</i>               | 5.90E-04       | 0.2333  | <i>Ak3</i>                  | 2.40E-04       | 0.4251  | <i>Flnc</i>                 | 8.08E-04       | 0.3575   |
| <i>Erc2</i>                 | 8.90E-04       | 0.7306  | <i>Zfp36</i>                | 1.90E-03       | 0.2193  | <i>Prkd3</i>                | 1.22E-03       | 0.7184   |
| <i>Sgms2</i>                | 1.70E-03       | 0.7464  | <i>Prelp</i>                | 3.00E-03       | 0.3326  | <i>Igfbp5</i>               | 1.91E-03       | 0.2298   |
| <i>Plin3</i>                | 1.90E-03       | 0.8734  | <i>Trp53inp2</i>            | 3.90E-03       | 0.0369  | <i>Neurod1</i>              | 2.65E-03       | 0.4825   |
| <i>Ajuba</i>                | 3.60E-03       | 0.0227  | <i>Nasp</i>                 | 4.50E-03       | 0.4786  | <i>Ankrd13a</i>             | 2.76E-03       | 0.4012   |
| <i>Trp53inp2</i>            | 3.90E-03       | 0.0369  | <i>Ldlrap1</i>              | 5.00E-03       | 0.9162  | <i>March8</i>               | 4.02E-03       | 0.3812   |
| <i>Pla2g16</i>              | 3.90E-03       | Np      | <i>Arrdc3</i>               | 5.20E-03       | 0.0682  | <i>Tox3</i>                 | 4.24E-03       | 3.03E-03 |
| <i>Slc15a1</i>              | 5.90E-03       | 0.8107  | <i>Pmp22</i>                | 5.50E-03       | 0.8493  | <i>Fgl2</i>                 | 6.22E-03       | Np       |
| <i>Frdm4b</i>               | 8.80E-03       | 0.6809  | <i>Lamc1</i>                | 7.40E-03       | 0.782   | <i>Epha7</i>                | 6.46E-03       | 0.2595   |
| <i>Micall1</i>              | 9.20E-03       | 0.7463  | <i>Col3a1</i>               | 7.70E-03       | Np      | <i>Npc1</i>                 | 6.51E-03       | 0.3037   |
| <i>Zbtb7b</i>               | 9.40E-03       | 0.4818  | <i>Trp53inp1</i>            | 8.00E-03       | 0.0971  | <i>Ptp4a3</i>               | 6.86E-03       | 0.1256   |
| <i>Elovl1</i>               | 0.0102         | 0.1193  | <i>Bmpr1a</i>               | 8.00E-03       | 0.7643  | <i>Capn2</i>                | 6.91E-03       | 0.9968   |
| <i>Irgm2</i>                | 0.011          | 0.8259  | <i>Col4a5</i>               | 8.10E-03       | 0.0684  | <i>Kat2b</i>                | 7.17E-03       | 0.7636   |
| <i>Mroh1</i>                | 0.0116         | 0.0596  | <i>Hspg2</i>                | 8.10E-03       | 0.1123  | <i>Itga9</i>                | 7.53E-03       | 0.3914   |
| <i>Tapbp</i>                | 0.0126         | 0.0259  | <i>Pcdha11</i>              | 8.30E-03       | 0.0196  | <i>Fgf7</i>                 | 7.85E-03       | 0.4546   |
| <i>Mzt1</i>                 | 0.0126         | 0.71    | <i>Map4k4</i>               | 8.40E-03       | 0.4935  | <i>Tead1</i>                | 8.30E-03       | 0.91     |
| <i>Decr2</i>                | 0.0129         | 0.4821  | <i>Nckap5l</i>              | 8.70E-03       | 0.1517  | <i>Mtus1</i>                | 8.45E-03       | 0.3436   |
| <i>Pou2f2</i>               | 0.014          | 0.0916  | <i>Ss18l1</i>               | 9.70E-03       | 0.8385  | <i>Otud7b</i>               | 8.78E-03       | 0.5738   |
| <i>Arhgap28</i>             | 0.0141         | 0.9098  | <i>Slc38a2</i>              | 0.0113         | 0.9096  | <i>Ezh2</i>                 | 9.32E-03       | 0.1636   |
| <i>Nnat</i>                 | 0.0145         | 0.0138  | <i>Nfatc4</i>               | 0.0121         | 0.0751  | <i>Zbtb7b</i>               | 9.45E-03       | 0.4818   |
| <i>Vamp3</i>                | 0.0149         | 0.9968  | <i>Mlf1</i>                 | 0.0128         | 0.8472  | <i>Svil</i>                 | 9.79E-03       | 0.2551   |

|                 |        |        |                 |        |        |                    |        |        |
|-----------------|--------|--------|-----------------|--------|--------|--------------------|--------|--------|
| <i>Ankrd34a</i> | 0.0154 | 0.4814 | <i>Col5a2</i>   | 0.0133 | 0.038  | <i>Elovl1</i>      | 0.0102 | 0.1193 |
| <i>Fam19a1</i>  | 0.0161 | Np     | <i>Gab1</i>     | 0.0136 | 0.3259 | <i>Ssx2ip</i>      | 0.0108 | 0.234  |
| <i>Acot11</i>   | 0.0169 | 0.9658 | <i>Pou2f2</i>   | 0.014  | 0.0916 | <i>Fmn12</i>       | 0.0121 | 0.9881 |
| <i>Gpcpd1</i>   | 0.0171 | 0.97   | <i>Arhgap28</i> | 0.0141 | 0.9098 | <i>Efna3</i>       | 0.0121 | 0.6134 |
| <i>Adam11</i>   | 0.0185 | 0.7286 | <i>Daam2</i>    | 0.0147 | 0.2505 | <i>Ss18</i>        | 0.0124 | 0.5224 |
| <i>Hist1h4i</i> | 0.0193 | Np     | <i>Stag2</i>    | 0.0148 | 0.2811 | <i>Osbp2</i>       | 0.013  | 0.1093 |
| <i>Gla</i>      | 0.0198 | 0.3882 | <i>Vamp3</i>    | 0.0149 | 0.9968 | <i>Serpinf1</i>    | 0.0131 | 0.1735 |
| <i>Gdpgp1</i>   | 0.0201 | 0.466  | <i>Sgk1</i>     | 0.0149 | 0.5782 | <i>Dlgap1</i>      | 0.0131 | 0.52   |
| <i>Ston2</i>    | 0.0219 | 0.554  | <i>Il1rap</i>   | 0.0155 | 0.1841 | <i>Gramd3</i>      | 0.0135 | 0.1148 |
| <i>Lpp</i>      | 0.0222 | 0.0634 | <i>Gng12</i>    | 0.016  | 0.7079 | <i>Specc1l</i>     | 0.0144 | 0.513  |
| <i>Adamts1</i>  | 0.0223 | 0.55   | <i>Col4a6</i>   | 0.0162 | 0.0905 | <i>Slc16a9</i>     | 0.0146 | 0.1477 |
| <i>Prdx1</i>    | 0.0224 | 0.3332 | <i>Qk</i>       | 0.0168 | 0.8641 | <i>Zmynd11</i>     | 0.0147 | 0.4705 |
| <i>Smtnl2</i>   | 0.0227 | 0.9565 | <i>Calu</i>     | 0.017  | 0.451  | <i>Sgk1</i>        | 0.0149 | 0.5782 |
| <i>Rhog</i>     | 0.0234 | 0.5905 | <i>Gpcpd1</i>   | 0.0171 | 0.97   | <i>D16ertd472e</i> | 0.0153 | 0.2719 |
| <i>Abhd4</i>    | 0.0244 | 0.8491 | <i>Sh3glb1</i>  | 0.0173 | 0.5456 | <i>Fat3</i>        | 0.0156 | 0.2931 |
| <i>Plekhh2</i>  | 0.0254 | 0.534  | <i>Enpp2</i>    | 0.0173 | 0.0324 | <i>Qk</i>          | 0.0168 | 0.8641 |
| <i>Sestd1</i>   | 0.0255 | 0.95   | <i>Sms</i>      | 0.0178 | 0.3724 | <i>Pak2</i>        | 0.0169 | 0.5903 |
| <i>R3hdm1</i>   | 0.028  | 0.6007 | <i>Itgb1</i>    | 0.0183 | 0.3483 | <i>Cttnbp2nl</i>   | 0.017  | 0.5486 |
| <i>Agap2</i>    | 0.0287 | 0.2054 | <i>Frem1</i>    | 0.0187 | 0.2853 | <i>Gpcpd1</i>      | 0.0171 | 0.97   |
| <i>Pigv</i>     | 0.0292 | 0.5691 | <i>Sp1</i>      | 0.019  | 0.9186 | <i>Gltp</i>        | 0.0171 | 0.4387 |
| <i>Nxt2</i>     | 0.0298 | 0.9802 | <i>Slc30a3</i>  | 0.0192 | 0.8591 | <i>Aldh1a2</i>     | 0.0173 | Np     |
| <i>Dock3</i>    | 0.0311 | 0.9669 | <i>Cdk6</i>     | 0.0197 | 0.6646 | <i>Cdk6</i>        | 0.0197 | 0.6646 |
| <i>Abi2</i>     | 0.0324 | 0.3676 | <i>Col19a1</i>  | 0.0198 | 0.7261 | <i>Lbh</i>         | 0.0197 | 0.9106 |
| <i>Tnfaip6</i>  | 0.033  | 0.6581 | <i>Col1a2</i>   | 0.0204 | 0.1134 | <i>Col19a1</i>     | 0.0198 | 0.7261 |
| <i>Arpc4</i>    | 0.0334 | 0.3871 | <i>Smtnl2</i>   | 0.0227 | 0.9565 | <i>Kcnd1</i>       | 0.0201 | 0.2584 |
| <i>Magi1</i>    | 0.0336 | 0.7567 | <i>Xkr4</i>     | 0.0232 | 0.4042 | <i>Plcb1</i>       | 0.0216 | 0.0142 |

|                      |        |        |                 |        |        |                |        |          |
|----------------------|--------|--------|-----------------|--------|--------|----------------|--------|----------|
| <i>Chrm1</i>         | 0.0352 | 0.4402 | <i>Fbxw9</i>    | 0.0235 | 0.2259 | <i>Slc12a2</i> | 0.0249 | 0.6439   |
| <i>Bcl7a</i>         | 0.0353 | 0.9331 | <i>Elf2</i>     | 0.0236 | 0.625  | <i>Fstl1</i>   | 0.025  | 7.45E-03 |
| <i>Kcnk6</i>         | 0.0356 | 0.4593 | <i>Emp1</i>     | 0.0238 | 0.1846 | <i>Trim3</i>   | 0.0251 | 0.4046   |
| <i>Cep97</i>         | 0.0376 | 0.2125 | <i>Ptpn11</i>   | 0.024  | 0.5829 | <i>Ugcg</i>    | 0.0273 | 0.2365   |
| <i>Tor1aip2</i>      | 0.0384 | 0.9228 | <i>Abhd4</i>    | 0.0244 | 0.8491 | <i>Mgat5b</i>  | 0.0277 | 0.5991   |
| <i>Sufu</i>          | 0.0386 | 0.2894 | <i>Nfatc3</i>   | 0.0249 | 0.643  | <i>Gls</i>     | 0.0291 | 0.2767   |
| <i>Kl</i>            | 0.0386 | 0.0537 | <i>Serpinh1</i> | 0.0249 | 0.7587 | <i>Abcg4</i>   | 0.0294 | 0.6244   |
| <i>Thap2</i>         | 0.0409 | 0.7109 | <i>Fstl1</i>    | 0.025  | 0.0075 | <i>Zfpm2</i>   | 0.0296 | 0.2926   |
| <i>Atad2</i>         | 0.0411 | 0.0249 | <i>Sestd1</i>   | 0.0255 | 0.95   | <i>Sox11</i>   | 0.0296 | 0.7993   |
| <i>Trim44</i>        | 0.0447 | 0.4883 | <i>Mybl2</i>    | 0.0256 | 0.2905 | <i>Nxt2</i>    | 0.0298 | 0.9802   |
| <i>Rmi2</i>          | 0.0449 | 0.594  | <i>Pcdhac2</i>  | 0.0262 | 0.2981 | <i>Oxsr1</i>   | 0.0301 | 0.698    |
| <i>Ranbp3l</i>       | 0.0456 | 0.1552 | <i>Hepacam</i>  | 0.0266 | 0.9029 | <i>Zdhhc1</i>  | 0.0304 | 0.5474   |
| <i>Vezf1</i>         | 0.0469 | 0.4848 | <i>Slc22a5</i>  | 0.0266 | 0.8398 | <i>Usp28</i>   | 0.0306 | 0.3771   |
| <i>Nrgn</i>          | 0.0474 | 0.1729 | <i>Dcaf7</i>    | 0.0268 | 0.3641 | <i>Erbp2ip</i> | 0.0308 | Np       |
| <i>Fndc3b</i>        | 0.0486 | 0.5035 | <i>Oxtr</i>     | 0.0274 | 0.0268 | <i>Dnlz</i>    | 0.0309 | 0.945    |
| <i>Actl6a</i>        | 0.0491 | 0.7466 | <i>Pcdha1</i>   | 0.0287 | 0.5914 | <i>Gulp1</i>   | 0.0348 | 0.3915   |
| <i>Dnase2a</i>       | 0.0502 | 0.1149 | <i>Zfp652</i>   | 0.0287 | 0.552  | <i>Robo2</i>   | 0.035  | 0.0711   |
| <i>Slc23a2</i>       | 0.0535 | 0.9043 | <i>Ltbr</i>     | 0.0294 | 0.2447 | <i>Pik3r3</i>  | 0.0352 | 0.3098   |
| <i>Scn8a</i>         | 0.0554 | 0.0506 | <i>Ncoa4</i>    | 0.0294 | 0.4685 | <i>Fbxl7</i>   | 0.0355 | 0.2769   |
| <i>Tmem201</i>       | 0.0568 | 0.955  | <i>Nid2</i>     | 0.0295 | 0.317  | <i>Kcnk6</i>   | 0.0356 | 0.4593   |
| <i>Rbfox1</i>        | 0.0575 | 0.1516 | <i>Fermt2</i>   | 0.0323 | 0.8667 | <i>Ikbke</i>   | 0.0373 | 0.5293   |
| <i>9930104l06rik</i> | 0.0633 | 0.9247 | <i>Tnfrsf1a</i> | 0.0327 | 0.2099 | <i>Cacna1d</i> | 0.0376 | 0.723    |
| <i>Slc17a7</i>       | 0.0646 | 0.956  | <i>Kifc2</i>    | 0.0336 | 0.1395 | <i>Slc45a3</i> | 0.0387 | 0.8313   |
| <i>Plekhh1</i>       | 0.065  | 0.4037 | <i>Adam12</i>   | 0.0337 | 0.0389 | <i>Tspan2</i>  | 0.0392 | 0.5085   |
| <i>Mtf1</i>          | 0.0653 | 0.0012 | <i>Pik3r3</i>   | 0.0352 | 0.3098 | <i>Rufy2</i>   | 0.0409 | 0.8328   |
| <i>Kif21b</i>        | 0.0661 | 0.5011 | <i>Figf</i>     | 0.0353 | 0.3021 | <i>Slc6a9</i>  | 0.0411 | 0.3921   |

|                |        |        |                   |        |        |                |        |          |
|----------------|--------|--------|-------------------|--------|--------|----------------|--------|----------|
| <i>Nrcam</i>   | 0.0668 | 0.3154 | <i>Bcl7a</i>      | 0.0353 | 0.9331 | <i>Tsnax</i>   | 0.0416 | 0.2772   |
| <i>Dmwd</i>    | 0.0722 | 0.0459 | <i>Iffo1</i>      | 0.0361 | 0.4469 | <i>Zdhhc21</i> | 0.0431 | 0.2472   |
| <i>Tbl1xr1</i> | 0.0729 | 0.9606 | <i>Ptp4a1</i>     | 0.037  | 0.0072 | <i>Hic1</i>    | 0.0432 | 0.6354   |
| <i>Exosc4</i>  | 0.0732 | 0.1275 | <i>Adamts7</i>    | 0.0378 | 0.9537 | <i>Jag1</i>    | 0.0433 | 0.0923   |
| <i>Lrrn4cl</i> | 0.0742 | 0.148  | <i>Unc13b</i>     | 0.0378 | 0.8802 | <i>Rcor2</i>   | 0.0452 | 0.4361   |
| <i>Ecm2</i>    | 0.075  | 0.2213 | <i>Bmf</i>        | 0.0403 | 0.5906 | <i>Ryr2</i>    | 0.0453 | 0.5004   |
| <i>Traf4</i>   | 0.0761 | 0.2057 | <i>Hbp1</i>       | 0.041  | 0.7426 | <i>Bhlhe22</i> | 0.0469 | 0.2305   |
| <i>Dpysl5</i>  | 0.0765 | 0.4591 | <i>Zbtb5</i>      | 0.0413 | 0.93   | <i>Bcl11a</i>  | 0.0485 | 0.9195   |
| <i>Tbc1d24</i> | 0.0818 | 0.7809 | <i>Vcl</i>        | 0.0413 | 0.9913 | <i>Yipf6</i>   | 0.0487 | 0.0702   |
| <i>Pclaf</i>   | 0.0833 | 0.6576 | <i>Zfp36l1</i>    | 0.0426 | 0.2418 | <i>Myo1d</i>   | 0.0501 | 0.5662   |
| <i>Trim36</i>  | 0.0835 | 0.4175 | <i>Zdhhc21</i>    | 0.0431 | 0.2472 | <i>Kcnc1</i>   | 0.0516 | 0.0433   |
| <i>Trim27</i>  | 0.0845 | 0.8799 | <i>Kirrel</i>     | 0.0439 | 0.0645 | <i>Nat8l</i>   | 0.0523 | 0.3822   |
| <i>Ptprf</i>   | 0.0878 | 0.7381 | <i>Col8a1</i>     | 0.0445 | 0.252  | <i>Nsf</i>     | 0.0539 | 0.2056   |
| <i>Fzd5</i>    | 0.0903 | 0.563  | <i>Rnf169</i>     | 0.0451 | 0.8297 | <i>Megf9</i>   | 0.0544 | 0.528    |
| <i>Bcam</i>    | 0.0918 | 0.1571 | <i>Ndrg4</i>      | 0.0457 | 0.8237 | <i>Syt1</i>    | 0.0554 | 0.0414   |
| <i>Efr3b</i>   | 0.0928 | 0.3639 | <i>Csgalnact2</i> | 0.0475 | 0.8264 | <i>Kdm1a</i>   | 0.0555 | 0.1499   |
| <i>Ext1</i>    | 0.0934 | 0.1178 | <i>Adamts9</i>    | 0.0486 | 0.0434 | <i>Tmpo</i>    | 0.0557 | 0.8875   |
| <i>Kcnma1</i>  | 0.0973 | 0.6124 | <i>Kif26a</i>     | 0.049  | 0.5421 | <i>Adam23</i>  | 0.057  | 0.1069   |
| <i>Mark2</i>   | 0.0993 | 0.3195 | <i>Slc39a9</i>    | 0.0494 | 0.0884 | <i>Zfp523</i>  | 0.0594 | 0.1888   |
| <i>Rragd</i>   | 0.1045 | 0.9956 | <i>Tspan9</i>     | 0.051  | 0.2557 | <i>Setd7</i>   | 0.0598 | 4.24E-03 |
| <i>Cacnb3</i>  | 0.1081 | 0.9207 | <i>Tmem183a</i>   | 0.0521 | 0.9314 | <i>Car7</i>    | 0.0606 | 0.5971   |
| <i>Lrrc58</i>  | 0.1087 | 0.8778 | <i>Dynlt1b</i>    | 0.0529 | 0.7828 | <i>Alpk3</i>   | 0.061  | 0.5872   |
| <i>Dtna</i>    | 0.1126 | 0.5032 | <i>Plp1</i>       | 0.0531 | 0.3612 | <i>Slc43a2</i> | 0.062  | 0.0537   |
| <i>Ncan</i>    | 0.1207 | 0.9851 | <i>Rnf165</i>     | 0.0533 | 0.9267 | <i>Creb5</i>   | 0.0623 | 0.9746   |
| <i>Smarcd2</i> | 0.1244 | 0.2662 | <i>Col24a1</i>    | 0.0539 | 0.0514 | <i>Pappa</i>   | 0.0632 | 0.6818   |
| <i>Grin2b</i>  | 0.1247 | 0.5974 | <i>Reps2</i>      | 0.0543 | 0.0439 | <i>Itga5</i>   | 0.0636 | 0.9431   |



|                |        |        |                |        |        |               |        |        |
|----------------|--------|--------|----------------|--------|--------|---------------|--------|--------|
| <i>Lix1</i>    | 0.1248 | 0.4318 | <i>Slc16a1</i> | 0.0553 | 0.0105 | <i>Trp63</i>  | 0.0645 | 0.6221 |
| <i>Bpnt1</i>   | 0.1263 | 0.0914 | <i>Tmem201</i> | 0.0568 | 0.955  | <i>Sptlc1</i> | 0.0648 | 0.6839 |
| <i>Tm9sf4</i>  | 0.1271 | 0.2425 | <i>Mblac2</i>  | 0.0569 | 0.3271 | <i>Dusp4</i>  | 0.065  | 0.0236 |
| <i>Pde4c</i>   | 0.129  | 0.1889 | <i>Pcdha4</i>  | 0.0596 | 0.1386 | <i>Ugp2</i>   | 0.0658 | 0.8004 |
| <i>Nucks1</i>  | 0.1348 | 0.757  | <i>Sox12</i>   | 0.0598 | 0.0213 | <i>Zfp346</i> | 0.0684 | 0.0104 |
| <i>sep-03</i>  | 0.136  | Np     | <i>Ccdc117</i> | 0.0604 | 0.0514 | <i>Thpo</i>   | 0.0716 | 0.1863 |
| <i>Ccnt2</i>   | 0.1388 | 0.5125 | <i>Sparc</i>   | 0.0608 | 0.889  | <i>Ppp5c</i>  | 0.0743 | 0.5611 |
| <i>Impdh1</i>  | 0.1416 | 0.1041 | <i>Dbt</i>     | 0.0612 | 0.8146 | <i>Asph</i>   | 0.0755 | 0.681  |
| <i>Fadd</i>    | 0.1449 | 0.4523 | <i>Dgkd</i>    | 0.0616 | 0.5337 | <i>Csmd1</i>  | 0.076  | 0.9057 |
| <i>Htr5a</i>   | 0.146  | 0.115  | <i>Slc43a2</i> | 0.062  | 0.0537 | <i>Tiparp</i> | 0.0764 | 0.6169 |
| <i>Xrcc2</i>   | 0.1497 | 0.8893 | <i>Creb5</i>   | 0.0623 | 0.9746 | <i>Cadps</i>  | 0.0779 | 0.231  |
| <i>Afap1</i>   | 0.1535 | 0.7642 | <i>Rnd3</i>    | 0.0623 | 0.7731 | <i>Foxc1</i>  | 0.0783 | 0.0625 |
| <i>Gtf2a1</i>  | 0.1549 | 0.2438 | <i>Tsc22d3</i> | 0.0644 | 0.9509 | <i>Ybx1</i>   | 0.0799 | 0.6323 |
| <i>Ube2n</i>   | 0.1554 | 0.5646 | <i>Zfp346</i>  | 0.0684 | 0.0104 | <i>Lrp12</i>  | 0.0804 | 0.573  |
| <i>Cdk16</i>   | 0.1567 | 0.7533 | <i>Mmp2</i>    | 0.0686 | 0.0839 | <i>Mitf</i>   | 0.0804 | 0.0853 |
| <i>Ubac1</i>   | 0.1568 | 0.1478 | <i>Snx22</i>   | 0.0686 | 0.3546 | <i>Plk2</i>   | 0.0815 | 0.7518 |
| <i>Atxn7l3</i> | 0.1667 | 0.8897 | <i>Fras1</i>   | 0.0689 | 0.8767 | <i>Ephb3</i>  | 0.0823 | 0.119  |
| <i>Mrpl11</i>  | 0.1671 | 0.2533 | <i>Gtpbp2</i>  | 0.069  | 0.7044 | <i>Rcan2</i>  | 0.0831 | 0.2694 |
| <i>Fam96a</i>  | 0.1691 | Np     | <i>Fam136a</i> | 0.0703 | 0.3821 | <i>Glrh</i>   | 0.0839 | 0.0316 |
| <i>Ccdc127</i> | 0.1715 | 0.1141 | <i>Arrdc4</i>  | 0.0711 | 0.2302 | <i>Rell2</i>  | 0.0845 | 0.9035 |
| <i>Suds3</i>   | 0.1719 | 0.5298 | <i>Zfp827</i>  | 0.0718 | 0.9112 | <i>Rnf138</i> | 0.0868 | 0.8273 |
| <i>Aak1</i>    | 0.1733 | 0.1542 | <i>Nfia</i>    | 0.0731 | 0.0383 | <i>Prr16</i>  | 0.0871 | 0.3995 |
| <i>Pnpla3</i>  | 0.1771 | 0.2597 | <i>Calm3</i>   | 0.0748 | 0.503  | <i>Rell1</i>  | 0.089  | 0.1415 |
| <i>Soat1</i>   | 0.1776 | 0.3751 | <i>Stard8</i>  | 0.0753 | 0.9081 | <i>Tle4</i>   | 0.0897 | 0.3675 |
| <i>Sco1</i>    | 0.1792 | 0.7423 | <i>Traf4</i>   | 0.0761 | 0.2057 | <i>Slc6a8</i> | 0.0904 | 0.2601 |
| <i>Gdap1l1</i> | 0.1822 | 0.4926 | <i>Dpysl5</i>  | 0.0765 | 0.4591 | <i>Gca</i>    | 0.0906 | 0.3021 |

|                 |        |        |                 |        |        |                 |        |        |
|-----------------|--------|--------|-----------------|--------|--------|-----------------|--------|--------|
| <i>Lats1</i>    | 0.1829 | 0.2296 | <i>Acap3</i>    | 0.077  | 0.8494 | <i>Nck1</i>     | 0.093  | 0.1469 |
| <i>Onecut2</i>  | 0.1831 | 0.3022 | <i>Hmgcr</i>    | 0.0779 | 0.1173 | <i>Sez6l2</i>   | 0.095  | 0.0247 |
| <i>Zfp113</i>   | 0.1857 | 0.7817 | <i>Eln</i>      | 0.0794 | 0.0394 | <i>Ccny</i>     | 0.0962 | 0.603  |
| <i>Mmp24</i>    | 0.1887 | 0.8482 | <i>Nav3</i>     | 0.0795 | 0.6485 | <i>Dusp8</i>    | 0.0969 | 0.7249 |
| <i>Iba57</i>    | 0.1907 | 0.3749 | <i>Ephb3</i>    | 0.0823 | 0.119  | <i>B3galt5</i>  | 0.098  | 0.8936 |
| <i>Six4</i>     | 0.1929 | 0.0878 | <i>Col4a4</i>   | 0.0825 | 0.7957 | <i>Mtpn</i>     | 0.0986 | 0.0537 |
| <i>Strbp</i>    | 0.1931 | 0.2558 | <i>Stx1a</i>    | 0.0834 | 0.3966 | <i>Dclk1</i>    | 0.099  | 0.6141 |
| <i>Mrpl40</i>   | 0.1943 | 0.5669 | <i>Nup160</i>   | 0.0863 | 0.681  | <i>Slc4a7</i>   | 0.1016 | 0.1504 |
| <i>Pin1</i>     | 0.1965 | 0.8955 | <i>Rnf138</i>   | 0.0868 | 0.8273 | <i>Adcy2</i>    | 0.1024 | 0.1448 |
| <i>Nlgn3</i>    | 0.1969 | 0.979  | <i>Adamts18</i> | 0.087  | 0.7013 | <i>Mphosph9</i> | 0.1028 | 0.4068 |
| <i>Git2</i>     | 0.2005 | 0.401  | <i>Pdgfrb</i>   | 0.0872 | 0.3353 | <i>Kcnc3</i>    | 0.1033 | 0.0729 |
| <i>Bysl</i>     | 0.2104 | 0.5014 | <i>Dab1</i>     | 0.088  | 0.3701 | <i>Cdc37l1</i>  | 0.1037 | 0.3191 |
| <i>Nrf1</i>     | 0.2112 | 0.8185 | <i>Fzd5</i>     | 0.0903 | 0.563  | <i>Mapk10</i>   | 0.1041 | 0.0442 |
| <i>Cramp1l</i>  | 0.2115 | 0.9219 | <i>Paip2</i>    | 0.0904 | 0.9184 | <i>Rragd</i>    | 0.1045 | 0.9956 |
| <i>Arhgap19</i> | 0.2183 | 0.1867 | <i>Strn4</i>    | 0.0921 | 0.9294 | <i>Ankrd44</i>  | 0.1061 | 0.406  |
| <i>Slc39a1</i>  | 0.2199 | 0.7509 | <i>Ldlrad3</i>  | 0.0922 | 0.6263 | <i>Zfp217</i>   | 0.1065 | 0.3871 |
| <i>Cbfa2t2</i>  | 0.2255 | 0.9224 | <i>Cnr1</i>     | 0.093  | 0.3426 | <i>Hk3</i>      | 0.1073 | 0.3824 |
| <i>Synpo</i>    | 0.2299 | 0.276  | <i>Rapgef1l</i> | 0.0931 | 0.7997 | <i>Ap3s1</i>    | 0.1137 | 0.8524 |
| <i>Fam208a</i>  | 0.2307 | Np     | <i>Ppp1r3d</i>  | 0.0939 | 0.4598 | <i>Tjp1</i>     | 0.1162 | 0.2865 |
| <i>Erc6</i>     | 0.2321 | 0.7811 | <i>Lims1</i>    | 0.0941 | 0.5233 | <i>Stx1b</i>    | 0.1214 | 0.0506 |
| <i>Mapk14</i>   | 0.234  | 0.0868 | <i>Trafd1</i>   | 0.0947 | 0.5654 | <i>Serp1</i>    | 0.1241 | 0.9812 |
| <i>Bnip3l</i>   | 0.2399 | 0.1451 | <i>Itga11</i>   | 0.0947 | 0.7032 | <i>Acvr1</i>    | 0.1249 | 0.2006 |
| <i>Sc5d</i>     | 0.2471 | 0.0047 | <i>Frmd5</i>    | 0.0949 | 0.3022 | <i>Eaf1</i>     | 0.1249 | 0.029  |
| <i>Akt3</i>     | 0.2516 | 0.6734 | <i>Atrn</i>     | 0.0959 | 0.109  | <i>Fkbp4</i>    | 0.1274 | 0.1343 |
| <i>Chd3</i>     | 0.2546 | 0.0308 | <i>Plekha1</i>  | 0.0969 | 0.7907 | <i>Arl15</i>    | 0.1277 | 0.286  |
| <i>Scamp5</i>   | 0.256  | 0.7493 | <i>Ednrb</i>    | 0.0994 | 0.4466 | <i>Elovl2</i>   | 0.1317 | 0.1786 |

|                |        |        |                 |        |        |                |        |          |
|----------------|--------|--------|-----------------|--------|--------|----------------|--------|----------|
| <i>Limch1</i>  | 0.2617 | 0.7444 | <i>Prr5l</i>    | 0.0998 | 0.7357 | <i>Kcnab3</i>  | 0.1322 | 0.7022   |
| <i>Arvcf</i>   | 0.2629 | 0.5248 | <i>Slc25a22</i> | 0.1001 | 0.6866 | <i>Ptbp1</i>   | 0.1327 | 0.3406   |
| <i>Tmem55b</i> | 0.2641 | Np     | <i>Ppic</i>     | 0.1003 | 0.0914 | <i>Nucks1</i>  | 0.1348 | 0.757    |
| <i>Steap4</i>  | 0.2661 | 0.8457 | <i>Zhx1</i>     | 0.1005 | 0.337  | <i>sep-03</i>  | 0.136  | Np       |
| <i>Tgfb2</i>   | 0.2694 | 0.7256 | <i>Dcun1d4</i>  | 0.1017 | 0.9605 | <i>Pxn</i>     | 0.1378 | 0.3933   |
| <i>Zfp558</i>  | 0.2696 | 0.4602 | <i>Ubttd2</i>   | 0.1017 | 0.2187 | <i>Scn1b</i>   | 0.1382 | 0.3875   |
| <i>Pdxk</i>    | 0.2715 | 0.9348 | <i>Gpr37</i>    | 0.1032 | 0.6088 | <i>St18</i>    | 0.1394 | 0.6059   |
| <i>Tubb5</i>   | 0.275  | 0.7121 | <i>Kcnc3</i>    | 0.1033 | 0.0729 | <i>Rbms3</i>   | 0.1404 | 0.5519   |
| <i>Eno2</i>    | 0.277  | 0.6643 | <i>Mapk10</i>   | 0.1041 | 0.0442 | <i>Cacna1c</i> | 0.1447 | 0.5042   |
| <i>Eif4a2</i>  | 0.2773 | 0.6152 | <i>Megf6</i>    | 0.1046 | 0.0325 | <i>Dstyk</i>   | 0.1466 | 0.2599   |
| <i>Amot</i>    | 0.2797 | 0.8563 | <i>Pcyt1b</i>   | 0.1052 | 0.6311 | <i>Kank4</i>   | 0.1475 | 0.2734   |
| <i>Hnrnpc</i>  | 0.2824 | 0.8085 | <i>Cep68</i>    | 0.1077 | 0.6027 | <i>Src</i>     | 0.1495 | 0.9781   |
| <i>Luzp1</i>   | 0.2874 | 0.0072 | <i>Nrsn1</i>    | 0.109  | 0.2965 | <i>Gorasp2</i> | 0.1519 | 0.8094   |
| <i>Eid1</i>    | 0.2878 | 0.2102 | <i>Kbtbd8</i>   | 0.1097 | 0.871  | <i>Rbm27</i>   | 0.152  | 0.3149   |
| <i>Zfp385c</i> | 0.2953 | 0.1719 | <i>E2f7</i>     | 0.1116 | 0.4889 | <i>Stt3b</i>   | 0.1527 | 0.1215   |
| <i>Ptpn2</i>   | 0.2978 | 0.9265 | <i>Pknox2</i>   | 0.1121 | 0.3297 | <i>Ankrd12</i> | 0.1529 | 0.1419   |
| <i>Dach1</i>   | 0.3011 | 0.3804 | <i>Rab6b</i>    | 0.1133 | 0.2357 | <i>Slc12a6</i> | 0.1549 | 0.1019   |
| <i>Mapre2</i>  | 0.3057 | 0.0537 | <i>Tubb2a</i>   | 0.1137 | 0.2047 | <i>Rnf38</i>   | 0.1566 | 2.42E-03 |
| <i>Ifngr2</i>  | 0.3085 | 0.9278 | <i>Pdgfc</i>    | 0.1138 | 0.5147 | <i>Slc6a15</i> | 0.1571 | 0.2054   |
| <i>Frs2</i>    | 0.3105 | 0.8557 | <i>Mafb</i>     | 0.1165 | 0.8328 | <i>Rps13</i>   | 0.1613 | 5.54E-03 |
| <i>Pou3f1</i>  | 0.3121 | 0.5722 | <i>Adamts16</i> | 0.1174 | 0.1384 | <i>Nckap5</i>  | 0.162  | 0.1628   |
| <i>Nlk</i>     | 0.3127 | 0.0066 | <i>Rsad1</i>    | 0.1195 | 0.4862 | <i>Neurod2</i> | 0.1628 | 0.9197   |
| <i>Nhsl2</i>   | 0.3129 | 0.6094 | <i>Clmn</i>     | 0.1224 | 0.4664 | <i>Fam172a</i> | 0.1634 | 0.6082   |
| <i>Bbc3</i>    | 0.3156 | 0.2457 | <i>Elmo2</i>    | 0.1228 | 0.5446 | <i>Dag1</i>    | 0.1637 | 0.8578   |
| <i>Mkl2</i>    | 0.3164 | Np     | <i>Hpcal4</i>   | 0.1238 | 0.2251 | <i>Bach2</i>   | 0.166  | 0.3758   |
| <i>Kdm5c</i>   | 0.3192 | 0.077  | <i>Abcb6</i>    | 0.1242 | 0.5889 | <i>Nbea</i>    | 0.1667 | 0.456    |

|                |        |        |                |        |        |                |        |          |
|----------------|--------|--------|----------------|--------|--------|----------------|--------|----------|
| <i>Mlst8</i>   | 0.323  | 0.2887 | <i>Stmn2</i>   | 0.1294 | 0.5859 | <i>Ube3c</i>   | 0.1683 | 0.2626   |
| <i>Snx13</i>   | 0.3242 | 0.0687 | <i>Lin7a</i>   | 0.1307 | 0.6385 | <i>Rbm24</i>   | 0.1695 | 0.5715   |
| <i>Lekr1</i>   | 0.3246 | 0.8438 | <i>Col4a3</i>  | 0.1354 | 0.0456 | <i>Kcna2</i>   | 0.17   | 0.0135   |
| <i>Atrx</i>    | 0.3272 | 0.1408 | <i>Grip1</i>   | 0.1375 | 0.2173 | <i>Aak1</i>    | 0.1733 | 0.1542   |
| <i>Tceanc</i>  | 0.3353 | 0.8222 | <i>Ccnt2</i>   | 0.1388 | 0.5125 | <i>Mpp1</i>    | 0.1773 | 0.1385   |
| <i>Paxip1</i>  | 0.3376 | 0.1626 | <i>Impdh1</i>  | 0.1416 | 0.1041 | <i>Akap2</i>   | 0.1784 | Np       |
| <i>Gnl3l</i>   | 0.344  | 0.481  | <i>Pigt</i>    | 0.1439 | 0.3138 | <i>Plk4</i>    | 0.1813 | 0.323    |
| <i>Capn5</i>   | 0.3465 | 0.4212 | <i>Tmod3</i>   | 0.1462 | 0.9446 | <i>Onecut2</i> | 0.1831 | 0.3022   |
| <i>Kdr</i>     | 0.3511 | 0.4476 | <i>Zfp282</i>  | 0.1463 | 0.6939 | <i>Vash2</i>   | 0.1843 | 0.7723   |
| <i>Xbp1</i>    | 0.3512 | 0.0805 | <i>Bace1</i>   | 0.1482 | 0.279  | <i>Atpaf1</i>  | 0.185  | 0.9849   |
| <i>Sema4c</i>  | 0.3557 | 0.2929 | <i>Src</i>     | 0.1495 | 0.9781 | <i>Naa15</i>   | 0.1855 | 2.29E-03 |
| <i>Rbak</i>    | 0.3578 | 0.847  | <i>Dnm3</i>    | 0.1505 | 0.3293 | <i>Eml5</i>    | 0.191  | 0.2241   |
| <i>Ostf1</i>   | 0.3581 | 0.2256 | <i>Trim37</i>  | 0.1511 | 0.0272 | <i>Sgpl1</i>   | 0.1927 | 0.2021   |
| <i>Rfxank</i>  | 0.3619 | 0.1388 | <i>Abi1</i>    | 0.1518 | 0.305  | <i>Slc46a3</i> | 0.1927 | 0.7116   |
| <i>Agps</i>    | 0.365  | 0.525  | <i>Ccnd2</i>   | 0.1543 | 0.0465 | <i>Oxr1</i>    | 0.1943 | 0.0481   |
| <i>Ing5</i>    | 0.3662 | 0.6741 | <i>F11r</i>    | 0.1549 | 0.1018 | <i>Cdh12</i>   | 0.1951 | 0.0598   |
| <i>Hivep2</i>  | 0.3669 | 0.106  | <i>Eps15</i>   | 0.1559 | 0.1512 | <i>Ythdc1</i>  | 0.1956 | 0.1149   |
| <i>Gk5</i>     | 0.3755 | 0.645  | <i>Pitpnm3</i> | 0.1568 | 0.8142 | <i>Arid4b</i>  | 0.1965 | 0.0745   |
| <i>Dars2</i>   | 0.3784 | 0.6566 | <i>Nckap5</i>  | 0.162  | 0.1628 | <i>Vars</i>    | 0.197  | 0.4571   |
| <i>Emc1</i>    | 0.3803 | 0.1405 | <i>Nav1</i>    | 0.1622 | 0.662  | <i>Tmem33</i>  | 0.1971 | 1.22E-03 |
| <i>Psd2</i>    | 0.3837 | 0.9497 | <i>Pcdhac1</i> | 0.1622 | 0.6743 | <i>Pitpna</i>  | 0.1975 | 0.215    |
| <i>Ccl9</i>    | 0.384  | 0.1671 | <i>Serinc5</i> | 0.1632 | 0.6364 | <i>Prkab1</i>  | 0.2001 | 0.4389   |
| <i>Hnrnpab</i> | 0.3903 | 0.859  | <i>Pcdha7</i>  | 0.1634 | 0.396  | <i>Cacna1i</i> | 0.2003 | 0.0365   |
| <i>Ttc5</i>    | 0.3914 | 0.4984 | <i>Dag1</i>    | 0.1637 | 0.8578 | <i>Rbpj</i>    | 0.2008 | 0.102    |
| <i>Zfp874b</i> | 0.393  | 0.1839 | <i>Rab30</i>   | 0.1658 | 0.3435 | <i>Mboat2</i>  | 0.2041 | 0.0428   |
| <i>Tmx4</i>    | 0.3944 | 0.9149 | <i>Bach2</i>   | 0.166  | 0.3758 | <i>Aebp2</i>   | 0.2078 | 0.1815   |

|                 |        |        |                |        |        |                |        |          |
|-----------------|--------|--------|----------------|--------|--------|----------------|--------|----------|
| <i>Actr3</i>    | 0.3981 | 0.889  | <i>Kdm6b</i>   | 0.1709 | 0.9926 | <i>Ctdsp2</i>  | 0.2098 | 0.8078   |
| <i>Ncl</i>      | 0.3999 | 0.7808 | <i>Slc16a2</i> | 0.173  | 0.7024 | <i>Dclk2</i>   | 0.2103 | 0.0286   |
| <i>Cacna1g</i>  | 0.402  | 0.37   | <i>Tmem65</i>  | 0.1755 | 0.097  | <i>Rsbn1</i>   | 0.2145 | 0.1176   |
| <i>Zcchc2</i>   | 0.4052 | 0.0009 | <i>Shroom2</i> | 0.1759 | 0.3737 | <i>Gabra1</i>  | 0.2166 | 0.0371   |
| <i>Gatsl2</i>   | 0.4084 | Np     | <i>Col6a3</i>  | 0.176  | 0.7816 | <i>Atp1b1</i>  | 0.2171 | 0.5436   |
| <i>Srcin1</i>   | 0.4096 | 0.6667 | <i>Dnmt3b</i>  | 0.1762 | 0.4148 | <i>Necab3</i>  | 0.2179 | 0.6661   |
| <i>Lasp1</i>    | 0.4191 | 0.5481 | <i>Cmpk1</i>   | 0.1765 | 0.9562 | <i>Zfp36l2</i> | 0.219  | 0.6706   |
| <i>Zbtb34</i>   | 0.4195 | 0.2349 | <i>Lysmd1</i>  | 0.1774 | 0.8386 | <i>Lmtk2</i>   | 0.22   | 3.22E-03 |
| <i>Zfp459</i>   | 0.4197 | 0.324  | <i>Ric8</i>    | 0.1784 | Np     | <i>Trmt6</i>   | 0.2203 | 0.7231   |
| <i>Ing3</i>     | 0.4225 | 0.0059 | <i>Ttc14</i>   | 0.1784 | 0.3735 | <i>Mtdh</i>    | 0.2215 | 0.9709   |
| <i>Zfp629</i>   | 0.4248 | 0.7865 | <i>Cbx2</i>    | 0.1818 | 0.5538 | <i>Map3k14</i> | 0.2232 | 0.37     |
| <i>Ccdc62</i>   | 0.4272 | 0.2038 | <i>Asb11</i>   | 0.1828 | 0.5056 | <i>Dhx40</i>   | 0.2233 | 0.7992   |
| <i>Kcmf1</i>    | 0.4311 | 0.3424 | <i>Onecut2</i> | 0.1831 | 0.3022 | <i>Mef2a</i>   | 0.2248 | 0.7416   |
| <i>Stx17</i>    | 0.4313 | 0.3294 | <i>Pik3r1</i>  | 0.1831 | 0.1707 | <i>Ctbp1</i>   | 0.2265 | 0.3418   |
| <i>Xpo1</i>     | 0.4358 | 0.2263 | <i>Gxylt2</i>  | 0.1839 | 0.0984 | <i>Lemd3</i>   | 0.2266 | 0.1179   |
| <i>Trappc13</i> | 0.4363 | 0.0515 | <i>Ccdc28b</i> | 0.1841 | 0.3056 | <i>Tspan33</i> | 0.2305 | 0.4231   |
| <i>Nup214</i>   | 0.438  | 0.7705 | <i>Vash2</i>   | 0.1843 | 0.7723 | <i>Syt9</i>    | 0.2306 | 0.5073   |
| <i>Bbs1</i>     | 0.4414 | 0.9449 | <i>Kcnc2</i>   | 0.1848 | 0.3639 | <i>Hip1r</i>   | 0.2309 | 0.7054   |
| <i>Nop9</i>     | 0.4448 | 0.5968 | <i>Canx</i>    | 0.1851 | 0.0656 | <i>Tbc1d19</i> | 0.2309 | 0.177    |
| <i>Cd34</i>     | 0.4448 | 0.112  | <i>Camk1d</i>  | 0.1862 | 0.3861 | <i>Rwdd4a</i>  | 0.2338 | 0.1345   |
| <i>Sap18</i>    | 0.4451 | 0.567  | <i>Dpp4</i>    | 0.1884 | 0.5902 | <i>Lgi3</i>    | 0.2341 | 0.1059   |
| <i>Nkiras1</i>  | 0.4458 | 0.2605 | <i>Mmp24</i>   | 0.1887 | 0.8482 | <i>Inpp5a</i>  | 0.2387 | 0.4842   |
| <i>Ppp1r9a</i>  | 0.4498 | 0.1313 | <i>Eml5</i>    | 0.191  | 0.2241 | <i>Bnip3l</i>  | 0.2399 | 0.1451   |
| <i>Mga</i>      | 0.4529 | 0.1735 | <i>Erlin2</i>  | 0.192  | 0.3565 | <i>Scn1a</i>   | 0.2417 | 0.0155   |
| <i>Cst6</i>     | 0.4547 | 0.058  | <i>Elovl4</i>  | 0.1925 | 0.196  | <i>Bsn</i>     | 0.2428 | 0.31     |
| <i>Slc20a1</i>  | 0.4619 | 0.017  | <i>Vash1</i>   | 0.1927 | 0.6959 | <i>Vcpi1</i>   | 0.2445 | 0.0183   |

|                |        |        |                |        |        |                 |        |          |
|----------------|--------|--------|----------------|--------|--------|-----------------|--------|----------|
| <i>Gaa</i>     | 0.465  | 0.9947 | <i>Dusp22</i>  | 0.1928 | 0.2826 | <i>Zfp148</i>   | 0.2446 | 0.4569   |
| <i>Mlec</i>    | 0.4668 | 0.2931 | <i>Oxr1</i>    | 0.1943 | 0.0481 | <i>Nacc2</i>    | 0.2454 | 0.5379   |
| <i>Hdac8</i>   | 0.474  | 0.9331 | <i>Spry4</i>   | 0.195  | 0.2089 | <i>Chordc1</i>  | 0.2474 | 0.0231   |
| <i>Ap1g1</i>   | 0.4764 | 0.0025 | <i>Nlgn3</i>   | 0.1969 | 0.979  | <i>Phf20</i>    | 0.2477 | 0.7242   |
| <i>Zcchc17</i> | 0.4771 | 0.568  | <i>Setd5</i>   | 0.1969 | 0.9423 | <i>Ahcyl2</i>   | 0.2504 | 0.5982   |
| <i>Ppp2r2a</i> | 0.4937 | 0.2609 | <i>Nktr</i>    | 0.197  | 0.532  | <i>Pip4k2c</i>  | 0.2505 | 0.0763   |
| <i>Ulk1</i>    | 0.4938 | 0.0859 | <i>Pitpna</i>  | 0.1975 | 0.215  | <i>Gde1</i>     | 0.253  | 0.5553   |
| <i>Pycr1</i>   | 0.497  | 0.3416 | <i>Fbn1</i>    | 0.1978 | 0.0821 | <i>Sipa1l2</i>  | 0.259  | 9.68E-03 |
| <i>Slc8b1</i>  | 0.4995 | 0.1617 | <i>Senp1</i>   | 0.198  | 0.8287 | <i>Limch1</i>   | 0.2617 | 0.7444   |
| <i>Phf13</i>   | 0.5038 | 0.1917 | <i>Atp6v1a</i> | 0.1992 | 0.4089 | <i>Fnip1</i>    | 0.2625 | 0.0619   |
| <i>Slc4a4</i>  | 0.505  | 0.3789 | <i>Cx3cl1</i>  | 0.2066 | 0.107  | <i>Max</i>      | 0.2627 | 0.5087   |
| <i>Tex9</i>    | 0.5052 | 0.4685 | <i>Col22a1</i> | 0.2113 | 0.136  | <i>Ints2</i>    | 0.2649 | 0.1634   |
| <i>Ing2</i>    | 0.5101 | 0.1932 | <i>Tdg</i>     | 0.2139 | 0.5728 | <i>Grb7</i>     | 0.2658 | 0.1271   |
| <i>Zfp354a</i> | 0.5179 | 0.5553 | <i>Maz</i>     | 0.2164 | 0.2486 | <i>Man2a1</i>   | 0.267  | 1.36E-04 |
| <i>Usp45</i>   | 0.5206 | 0.1245 | <i>Atp1b1</i>  | 0.2171 | 0.5436 | <i>Prdm1</i>    | 0.2671 | 0.2198   |
| <i>Slc27a1</i> | 0.5254 | 0.4195 | <i>Gpr85</i>   | 0.2183 | 0.9753 | <i>Cep55</i>    | 0.2673 | 0.437    |
| <i>Tstd2</i>   | 0.5255 | 0.8239 | <i>Pcdha3</i>  | 0.2183 | 0.2448 | <i>Tmtc4</i>    | 0.2677 | 0.1232   |
| <i>Srf</i>     | 0.528  | 0.551  | <i>Cd276</i>   | 0.2199 | 0.0863 | <i>Rgs7bp</i>   | 0.2691 | 0.0133   |
| <i>Rrp1b</i>   | 0.5299 | 0.312  | <i>Lmtk2</i>   | 0.22   | 0.0032 | <i>Srgap3</i>   | 0.2704 | 0.2683   |
| <i>Efnb1</i>   | 0.5322 | 0.7797 | <i>Hexa</i>    | 0.2217 | 0.5771 | <i>Tmem229b</i> | 0.2712 | 0.5418   |
| <i>Serf2</i>   | 0.5328 | 0.9061 | <i>Usp42</i>   | 0.2249 | 0.6088 | <i>Srsf1</i>    | 0.2782 | 0.2339   |
| <i>Aplp2</i>   | 0.5332 | 0.0217 | <i>Med26</i>   | 0.225  | 0.2526 | <i>Plekho2</i>  | 0.2784 | 0.9355   |
| <i>Dhx37</i>   | 0.539  | 0.5301 | <i>Rybp</i>    | 0.2257 | 0.1732 | <i>Ptprd</i>    | 0.2817 | 0.0775   |
| <i>Cops7b</i>  | 0.5444 | 0.3668 | <i>Agtr2</i>   | 0.2261 | 0.7046 | <i>Phtf2</i>    | 0.2846 | 2.25E-03 |
| <i>Tox4</i>    | 0.5449 | 0.395  | <i>Zfp641</i>  | 0.2262 | 0.4407 | <i>Appl2</i>    | 0.2871 | 0.2105   |
| <i>Knop1</i>   | 0.5464 | 0.3036 | <i>Lemd3</i>   | 0.2266 | 0.1179 | <i>Luzp1</i>    | 0.2874 | 7.22E-03 |

|                      |        |        |                 |        |        |                      |        |          |
|----------------------|--------|--------|-----------------|--------|--------|----------------------|--------|----------|
| <i>Zbtb6</i>         | 0.5483 | 0.9267 | <i>Ankrd13b</i> | 0.2275 | 0.7064 | <i>Pitpnm2</i>       | 0.2875 | 0.6314   |
| <i>Eri2</i>          | 0.553  | 0.2739 | <i>Lactb2</i>   | 0.2278 | 0.5889 | <i>Api5</i>          | 0.2879 | 0.1179   |
| <i>Scrt1</i>         | 0.5566 | 0.0536 | <i>Syt9</i>     | 0.2306 | 0.5073 | <i>Sh3pxd2b</i>      | 0.291  | 0.6029   |
| <i>9130011e15rik</i> | 0.5698 | Np     | <i>Ercc6</i>    | 0.2321 | 0.7811 | <i>Zc3h11a</i>       | 0.2934 | 0.283    |
| <i>Gtpbp3</i>        | 0.5825 | 0.7047 | <i>Ppp2ca</i>   | 0.235  | 0.4042 | <i>Ncoa3</i>         | 0.2957 | 0.4109   |
| <i>Atxn1l</i>        | 0.5894 | 0.2692 | <i>Camk2g</i>   | 0.237  | 0.1363 | <i>Ptpn2</i>         | 0.2978 | 0.9265   |
| <i>Osbpl8</i>        | 0.5899 | 0.0466 | <i>Dpysl2</i>   | 0.2373 | 0.1038 | <i>Spty2d1</i>       | 0.2998 | 0.0436   |
| <i>Timmdc1</i>       | 0.5902 | 0.7772 | <i>Aff4</i>     | 0.2389 | 0.2591 | <i>St3gal3</i>       | 0.3024 | 0.0867   |
| <i>Tmem263</i>       | 0.5939 | 0.2438 | <i>Mat2a</i>    | 0.2462 | 0.9118 | <i>8030462n17rik</i> | 0.3059 | 0.1415   |
| <i>Xpo7</i>          | 0.5968 | 0.0584 | <i>Akt3</i>     | 0.2516 | 0.6734 | <i>Pdlim3</i>        | 0.3067 | 0.1875   |
| <i>Commd8</i>        | 0.5998 | 0.5154 | <i>Rcor1</i>    | 0.2536 | 0.2406 | <i>Cxcl12</i>        | 0.3115 | 0.7447   |
| <i>Ifnar1</i>        | 0.6041 | 0.9411 | <i>Cyb561d1</i> | 0.2547 | 0.3926 | <i>Kpnb1</i>         | 0.313  | 0.2613   |
| <i>Ddhd2</i>         | 0.6058 | 0.6303 | <i>Arhgap5</i>  | 0.2551 | 0.7138 | <i>Erg</i>           | 0.3132 | 0.2569   |
| <i>Plxna2</i>        | 0.6091 | 0.8531 | <i>Daam1</i>    | 0.2552 | 0.0119 | <i>Ube2g2</i>        | 0.3157 | 0.4271   |
| <i>Srxn1</i>         | 0.6124 | 0.6038 | <i>Efna5</i>    | 0.2558 | 0.0459 | <i>Sos1</i>          | 0.3174 | 0.0178   |
| <i>Pex13</i>         | 0.6126 | 0.0471 | <i>Scamp5</i>   | 0.256  | 0.7493 | <i>Tmem55a</i>       | 0.3207 | Np       |
| <i>Pctp</i>          | 0.6127 | 0.8126 | <i>Arpp19</i>   | 0.2569 | 0.021  | <i>Plekha5</i>       | 0.322  | 0.9284   |
| <i>Cercam</i>        | 0.6148 | 0.2327 | <i>Pcdha2</i>   | 0.257  | 0.9926 | <i>Xpo4</i>          | 0.3255 | 0.8781   |
| <i>Ankrd13c</i>      | 0.6246 | 0.8007 | <i>Fbn2</i>     | 0.2591 | 0.8017 | <i>Srpr</i>          | 0.3269 | 0.4632   |
| <i>Tube1</i>         | 0.6267 | 0.6358 | <i>Setd8</i>    | 0.2593 | Np     | <i>St13</i>          | 0.3276 | 3.01E-04 |
| <i>Mab21l1</i>       | 0.6271 | 0.6931 | <i>Crispld1</i> | 0.2594 | 0.4754 | <i>Tbx15</i>         | 0.3283 | 0.0726   |
| <i>Smad9</i>         | 0.6289 | 0.2326 | <i>Ncor2</i>    | 0.2601 | 0.5021 | <i>Pde7a</i>         | 0.3344 | 0.3313   |
| <i>Bloc1s3</i>       | 0.6341 | 0.0623 | <i>Slc31a1</i>  | 0.2617 | 0.4137 | <i>Lonrf3</i>        | 0.337  | 0.2518   |
| <i>Arf4</i>          | 0.6375 | 0.919  | <i>Arvcf</i>    | 0.2629 | 0.5248 | <i>Kcnd2</i>         | 0.3388 | 0.0996   |
| <i>Isg20l2</i>       | 0.6413 | 0.8175 | <i>Tmem55b</i>  | 0.2641 | Np     | <i>Grk6</i>          | 0.3408 | 0.945    |
| <i>Pmaip1</i>        | 0.6431 | 0.5337 | <i>Cdc42bpa</i> | 0.2669 | 0.0129 | <i>Myo1b</i>         | 0.3429 | 0.3162   |

|                |        |        |                 |        |        |                |        |          |
|----------------|--------|--------|-----------------|--------|--------|----------------|--------|----------|
| <i>Tfcp2</i>   | 0.6433 | 0.5921 | <i>Mafg</i>     | 0.2691 | 0.7709 | <i>Taf12</i>   | 0.3429 | 0.051    |
| <i>Rrp36</i>   | 0.6511 | 0.766  | <i>Rab40c</i>   | 0.2697 | 0.2618 | <i>Fry</i>     | 0.3449 | 0.0625   |
| <i>Dynll1</i>  | 0.6631 | 0.872  | <i>Scap</i>     | 0.2699 | 0.8086 | <i>Gpr137b</i> | 0.349  | 0.9969   |
| <i>Taf5l</i>   | 0.6665 | 0.9622 | <i>Tmem229b</i> | 0.2712 | 0.5418 | <i>B4galt5</i> | 0.3495 | 0.1931   |
| <i>Luc7l2</i>  | 0.6684 | 0.2009 | <i>Suv420h2</i> | 0.2725 | Np     | <i>Kit</i>     | 0.3503 | 0.1206   |
| <i>Arc</i>     | 0.6778 | 0.1071 | <i>Zfp384</i>   | 0.273  | 0.7914 | <i>Rlim</i>    | 0.3512 | 0.354    |
| <i>Smg6</i>    | 0.6792 | 0.6821 | <i>Amot</i>     | 0.2797 | 0.8563 | <i>Neurod4</i> | 0.3542 | 0.37     |
| <i>Slc35e1</i> | 0.6798 | 0.2671 | <i>Ywhae</i>    | 0.2803 | 0.492  | <i>Lingo2</i>  | 0.3546 | 0.3475   |
| <i>Cdnf</i>    | 0.6812 | 0.6739 | <i>Erp44</i>    | 0.2812 | 0.2029 | <i>Plxna3</i>  | 0.3558 | 0.6105   |
| <i>Cracr2b</i> | 0.6853 | 0.7214 | <i>Klhdc3</i>   | 0.2814 | 0.2694 | <i>Rnf150</i>  | 0.3558 | 0.8276   |
| <i>Rad1</i>    | 0.6856 | 0.9004 | <i>Ptprd</i>    | 0.2817 | 0.0775 | <i>Aldh1a3</i> | 0.356  | 0.8571   |
| <i>Hp1bp3</i>  | 0.6875 | 0.7313 | <i>Snx24</i>    | 0.284  | 0.5527 | <i>Gxylt1</i>  | 0.3561 | 0.4006   |
| <i>Prr3</i>    | 0.6887 | 0.4067 | <i>Kdelc1</i>   | 0.2868 | Np     | <i>Dcp1a</i>   | 0.3566 | 7.37E-03 |
| <i>Ppih</i>    | 0.6889 | 0.7222 | <i>Luzp1</i>    | 0.2874 | 0.0072 | <i>Rac1</i>    | 0.357  | 0.8657   |
| <i>Rarb</i>    | 0.6932 | 0.656  | <i>Pitpnm2</i>  | 0.2875 | 0.6314 | <i>Slc17a6</i> | 0.3572 | 0.3787   |
| <i>Zmat3</i>   | 0.7043 | 0.0176 | <i>Zfp366</i>   | 0.2881 | 0.7767 | <i>Taf15</i>   | 0.3573 | 0.2889   |
| <i>Pofut1</i>  | 0.7112 | 0.0153 | <i>Fbxl20</i>   | 0.2902 | 0.116  | <i>Wsb1</i>    | 0.3592 | 0.2018   |
| <i>March2</i>  | 0.7148 | 0.8073 | <i>Gjd2</i>     | 0.2925 | 0.3314 | <i>En2</i>     | 0.3596 | 0.513    |
| <i>Zfp444</i>  | 0.7157 | 0.6333 | <i>Bak1</i>     | 0.2939 | 0.7623 | <i>Zcchc7</i>  | 0.3597 | 0.4231   |
| <i>Suz12</i>   | 0.7222 | 0.6103 | <i>Dpp3</i>     | 0.2953 | 0.3468 | <i>Pdcd6</i>   | 0.3618 | 0.5091   |
| <i>Tgfb1</i>   | 0.728  | 0.2906 | <i>Zfp385c</i>  | 0.2953 | 0.1719 | <i>Ptpn4</i>   | 0.3635 | 0.0669   |
| <i>Polr3gl</i> | 0.7337 | 0.4439 | <i>Htr7</i>     | 0.2957 | 0.9681 | <i>Atg14</i>   | 0.3638 | 0.674    |
| <i>Mrpl35</i>  | 0.7349 | 0.133  | <i>Metap2</i>   | 0.2986 | 0.6158 | <i>Nr3c1</i>   | 0.3648 | 0.0242   |
| <i>Rinl</i>    | 0.7382 | 0.6354 | <i>Pten</i>     | 0.2995 | 0.0047 | <i>Cd2ap</i>   | 0.3649 | 0.1179   |
| <i>Gnao1</i>   | 0.7465 | 0.065  | <i>Pole3</i>    | 0.3003 | 0.6692 | <i>Kdm6a</i>   | 0.3656 | 0.9735   |
| <i>Tnrc6b</i>  | 0.7481 | 0.6574 | <i>Pdhx</i>     | 0.3021 | 0.4846 | <i>Dab2ip</i>  | 0.3674 | 0.1724   |



|                 |        |        |                 |        |        |                |        |          |
|-----------------|--------|--------|-----------------|--------|--------|----------------|--------|----------|
| <i>Ebna1bp2</i> | 0.7484 | 0.8048 | <i>Ctnnbip1</i> | 0.3023 | 0.8977 | <i>Dusp10</i>  | 0.3724 | 0.1714   |
| <i>Man2a2</i>   | 0.7503 | 0.7848 | <i>Prpf3</i>    | 0.3023 | 0.2691 | <i>Zc3h6</i>   | 0.3729 | 0.1167   |
| <i>Gng2</i>     | 0.7519 | 0.7651 | <i>Mapre2</i>   | 0.3057 | 0.0537 | <i>Tdrd7</i>   | 0.3798 | 0.8753   |
| <i>Sumo1</i>    | 0.7608 | 0.5575 | <i>Dlg2</i>     | 0.3108 | 0.7865 | <i>Pdgfra</i>  | 0.38   | 0.0691   |
| <i>Slc25a51</i> | 0.762  | 0.2843 | <i>Zhx3</i>     | 0.3116 | 0.2433 | <i>Stc1</i>    | 0.3826 | 8.02E-03 |
| <i>Epm2aip1</i> | 0.7718 | 0.3217 | <i>Bbc3</i>     | 0.3156 | 0.2457 | <i>Klf11</i>   | 0.3909 | 0.2409   |
| <i>Mrpl17</i>   | 0.7723 | 0.7168 | <i>Cfl2</i>     | 0.3171 | 0.9368 | <i>Edil3</i>   | 0.3924 | 0.0108   |
| <i>Klhl24</i>   | 0.7779 | 0.6614 | <i>Bahd1</i>    | 0.318  | 0.8311 | <i>Fam196b</i> | 0.3926 | Np       |
| <i>Pkdcc</i>    | 0.7845 | 0.1026 | <i>Josd1</i>    | 0.3184 | 0.1951 | <i>Tmx4</i>    | 0.3944 | 0.9149   |
| <i>Atad2b</i>   | 0.7848 | 0.8929 | <i>Kdm5c</i>    | 0.3192 | 0.077  | <i>Msi2</i>    | 0.3944 | 0.7745   |
| <i>Map3k7</i>   | 0.7899 | 0.7413 | <i>Has2</i>     | 0.3218 | 0.1598 | <i>Mark3</i>   | 0.3946 | 0.6895   |
| <i>Sema4b</i>   | 0.7976 | 0.0917 | <i>Larp4b</i>   | 0.3228 | 0.8902 | <i>Kcnmb2</i>  | 0.3992 | 0.5074   |
| <i>Sema4g</i>   | 0.8007 | 0.2769 | <i>Vegfa</i>    | 0.3236 | 0.6414 | <i>Gad2</i>    | 0.4003 | 0.9105   |
| <i>Prx</i>      | 0.8008 | 0.1908 | <i>Palm</i>     | 0.3266 | 0.4854 | <i>Cacna1g</i> | 0.402  | 0.37     |
| <i>Rpp14</i>    | 0.8079 | 0.9773 | <i>Atrx</i>     | 0.3272 | 0.1408 | <i>Myo1c</i>   | 0.4041 | 0.4138   |
| <i>Ttn</i>      | 0.8098 | 0.4326 | <i>Dolpp1</i>   | 0.3295 | 0.3632 | <i>Kdm2a</i>   | 0.4049 | 0.0497   |
| <i>Plk3</i>     | 0.8107 | 0.1721 | <i>Cdkl2</i>    | 0.3296 | 0.9597 | <i>Zcchc2</i>  | 0.4052 | 8.89E-04 |
| <i>Trmt10a</i>  | 0.8112 | 0.3917 | <i>Edc3</i>     | 0.3313 | 0.2975 | <i>Ube2k</i>   | 0.4066 | 0.1659   |
| <i>Mcc</i>      | 0.8265 | 0.1413 | <i>Dgkk</i>     | 0.3321 | 0.959  | <i>Sik1</i>    | 0.4066 | 0.5614   |
| <i>Gmeb1</i>    | 0.8301 | 0.6892 | <i>Sidt1</i>    | 0.3337 | 0.0408 | <i>Glis2</i>   | 0.408  | 0.1192   |
| <i>Supt7l</i>   | 0.8313 | 0.1734 | <i>Tanc1</i>    | 0.3343 | 0.0986 | <i>Gatsl2</i>  | 0.4084 | Np       |
| <i>Senp5</i>    | 0.8342 | 0.2399 | <i>Tet2</i>     | 0.3344 | 0.2849 | <i>Necap1</i>  | 0.4102 | 0.7436   |
| <i>Nosip</i>    | 0.845  | 0.9108 | <i>Cnot6</i>    | 0.3347 | 0.7114 | <i>Zzef1</i>   | 0.4107 | 0.2877   |
| <i>Esrrg</i>    | 0.8458 | 0.2476 | <i>Hip1</i>     | 0.3351 | 0.8762 | <i>Cpsf6</i>   | 0.4113 | 0.5788   |
| <i>Bcs1l</i>    | 0.8461 | 0.6246 | <i>Pan2</i>     | 0.3381 | 0.5452 | <i>Nfatc2</i>  | 0.4128 | 0.2687   |
| <i>Zfp780b</i>  | 0.8463 | 0.8199 | <i>Ret</i>      | 0.3389 | 0.8834 | <i>Zbtb44</i>  | 0.4157 | 0.1098   |

|                |        |        |                 |        |        |                 |        |          |
|----------------|--------|--------|-----------------|--------|--------|-----------------|--------|----------|
| <i>N4bp2l2</i> | 0.8488 | 0.7671 | <i>Mycn</i>     | 0.339  | 0.3334 | <i>Sp4</i>      | 0.4193 | 0.9153   |
| <i>Rbm34</i>   | 0.8595 | 0.9329 | <i>Zbtb40</i>   | 0.3395 | 0.0083 | <i>Zbtb34</i>   | 0.4195 | 0.2349   |
| <i>Slc9a1</i>  | 0.8641 | 0.4737 | <i>Ankrd49</i>  | 0.3412 | 0.4866 | <i>Klf12</i>    | 0.4216 | 0.8291   |
| <i>Ldb2</i>    | 0.8663 | 0.6041 | <i>Hecw1</i>    | 0.3424 | 0.0053 | <i>Ing3</i>     | 0.4225 | 5.90E-03 |
| <i>Zfhx2</i>   | 0.8669 | 0.3699 | <i>Fbxo42</i>   | 0.3429 | 0.5884 | <i>Rrm2b</i>    | 0.4273 | 0.8939   |
| <i>Slc35e2</i> | 0.8753 | 0.0087 | <i>Chsy1</i>    | 0.3438 | 0.249  | <i>Pias2</i>    | 0.4288 | 1.99E-03 |
| <i>Kdm3b</i>   | 0.8776 | 0.7805 | <i>Ide</i>      | 0.3494 | 0.3136 | <i>Klf4</i>     | 0.4301 | 0.9002   |
| <i>Ttc26</i>   | 0.892  | 0.8388 | <i>Rlim</i>     | 0.3512 | 0.354  | <i>Stx17</i>    | 0.4313 | 0.3294   |
| <i>Gmfb</i>    | 0.8957 | 0.4287 | <i>Pxdn</i>     | 0.3588 | 0.8706 | <i>Ppp1r14b</i> | 0.4348 | 0.1012   |
| <i>Fgf9</i>    | 0.9052 | 0.1593 | <i>Prkg1</i>    | 0.3623 | 0.3902 | <i>Pptc7</i>    | 0.4396 | 0.5962   |
| <i>Akap8</i>   | 0.9059 | 0.7992 | <i>Blmh</i>     | 0.3627 | 0.5675 | <i>Mier3</i>    | 0.4407 | 0.3751   |
| <i>Rac2</i>    | 0.9071 | 0.2906 | <i>Wdfy1</i>    | 0.3633 | 0.4498 | <i>Ccni</i>     | 0.4442 | 0.6012   |
| <i>Kdelc2</i>  | 0.9115 | Np     | <i>Atg9a</i>    | 0.3634 | 0.2001 | <i>Smc6</i>     | 0.4462 | 0.8265   |
| <i>Fndc5</i>   | 0.9162 | 0.8211 | <i>Tgfb3</i>    | 0.3636 | 0.6892 | <i>Ppp1r9a</i>  | 0.4498 | 0.1313   |
| <i>Mtmr4</i>   | 0.9182 | 0.036  | <i>Dab2ip</i>   | 0.3674 | 0.1724 | <i>Fam76b</i>   | 0.4505 | 0.9612   |
| <i>Azi2</i>    | 0.9184 | 0.3464 | <i>Tnfaip1</i>  | 0.3683 | 0.673  | <i>Gigyf1</i>   | 0.4518 | 0.9844   |
| <i>Cyb5d2</i>  | 0.9208 | 0.9559 | <i>Shprh</i>    | 0.3687 | 0.0188 | <i>Fundc1</i>   | 0.4567 | 0.5386   |
| <i>Shh</i>     | 0.9216 | 0.1327 | <i>Ppp1r13b</i> | 0.3692 | 0.8485 | <i>Baz1a</i>    | 0.4569 | 0.0868   |
| <i>Fam118a</i> | 0.9272 | 0.9201 | <i>Col15a1</i>  | 0.3766 | 0.508  | <i>Insig1</i>   | 0.4622 | 0.5135   |
| <i>Robo1</i>   | 0.9335 | 0.5327 | <i>Pdgfra</i>   | 0.38   | 0.0691 | <i>Repin1</i>   | 0.4631 | 0.9434   |
| <i>Zbtb8a</i>  | 0.9374 | 0.2371 | <i>L3mbtl4</i>  | 0.38   | 0.4872 | <i>Calcoco1</i> | 0.4637 | 0.5521   |
| <i>Thoc2</i>   | 0.9391 | 0.8661 | <i>Dusp2</i>    | 0.3801 | 0.8683 | <i>Dmrt2</i>    | 0.4639 | 0.8154   |
| <i>Itn1</i>    | 0.9509 | 0.8362 | <i>Nfic</i>     | 0.3815 | 0.1648 | <i>Med1</i>     | 0.4703 | 0.1052   |
| <i>Txn1</i>    | 0.9527 | 0.8511 | <i>Suv420h1</i> | 0.3823 | Np     | <i>Ptpn5</i>    | 0.4708 | 0.3193   |
| <i>Stam</i>    | 0.9539 | 0.3669 | <i>Baiap2</i>   | 0.3829 | 0.4691 | <i>Celf2</i>    | 0.4728 | 0.6619   |
| <i>Fnbp1</i>   | 0.9564 | 0.4069 | <i>Spn</i>      | 0.3874 | 0.2244 | <i>Dexi</i>     | 0.4766 | 0.4968   |

|                      |        |        |                |        |        |                |        |          |
|----------------------|--------|--------|----------------|--------|--------|----------------|--------|----------|
| <i>Ncam1</i>         | 0.9571 | 0.8507 | <i>Tiam1</i>   | 0.3892 | 0.1171 | <i>Satb2</i>   | 0.4781 | 0.0396   |
| <i>Akap5</i>         | 0.9586 | 0.2878 | <i>Ythdf1</i>  | 0.3914 | 0.2387 | <i>Fam134c</i> | 0.4785 | Np       |
| <i>Dnmt3a</i>        | 0.9639 | 0.821  | <i>Mark3</i>   | 0.3946 | 0.6895 | <i>Slc19a2</i> | 0.4791 | 0.2465   |
| <i>Pfas</i>          | 0.9669 | 0.7593 | <i>Rlf</i>     | 0.3957 | 0.5317 | <i>Luzp2</i>   | 0.487  | 0.1069   |
| <i>Xkrx</i>          | 0.9679 | 0.9723 | <i>Ireb2</i>   | 0.3964 | 0.6265 | <i>Wdr12</i>   | 0.4891 | 0.9503   |
| <i>Dusp3</i>         | 0.9693 | 0.0336 | <i>Plekhf2</i> | 0.397  | 0.2879 | <i>Ube2z</i>   | 0.4924 | 0.7939   |
| <i>Klhl41</i>        | 0.9695 | 0.9177 | <i>Nebi</i>    | 0.4005 | 0.177  | <i>Btaf1</i>   | 0.4927 | 0.2803   |
| <i>Inpp5e</i>        | 0.9767 | 0.4617 | <i>Phf21a</i>  | 0.4011 | 0.8672 | <i>E2f6</i>    | 0.4952 | 0.0995   |
| <i>Zfp317</i>        | 0.9788 | 0.3805 | <i>Birc6</i>   | 0.4041 | 0.8527 | <i>Smek1</i>   | 0.4995 | Np       |
| <i>Plagl2</i>        | 0.9794 | 0.1878 | <i>Kdm2a</i>   | 0.4049 | 0.0497 | <i>Dcx</i>     | 0.4995 | 0.1623   |
| <i>Wdr82</i>         | 0.9801 | 0.3499 | <i>Ube2k</i>   | 0.4066 | 0.1659 | <i>Trhr</i>    | 0.5054 | 0.9477   |
| <i>Zdhhc3</i>        | 0.9807 | 0.6435 | <i>Sypl2</i>   | 0.4073 | 0.9338 | <i>Hmgn3</i>   | 0.5056 | 0.0892   |
| <i>Tigd3</i>         | 0.9819 | 0.1252 | <i>Glis2</i>   | 0.408  | 0.1192 | <i>Gpr88</i>   | 0.5101 | 0.5118   |
| <i>Zfp830</i>        | 0.9824 | 0.8655 | <i>Ccdc80</i>  | 0.4143 | 0.723  | <i>Igf1</i>    | 0.5112 | 0.7392   |
| <i>Psm11</i>         | 0.9825 | 0.1811 | <i>Vps26b</i>  | 0.4146 | 0.6504 | <i>Sphk2</i>   | 0.5117 | 0.0246   |
| <i>Ctsa</i>          | 0.9908 | 0.63   | <i>Spry1</i>   | 0.4178 | 0.452  | <i>Dock4</i>   | 0.5143 | 0.3169   |
| <i>Sfxn2</i>         | 0.9943 | 0.1233 | <i>Zbtb34</i>  | 0.4195 | 0.2349 | <i>Jdp2</i>    | 0.5148 | 0.1072   |
| <i>Cwc25</i>         | 0.9962 | 0.3294 | <i>Insrr</i>   | 0.4196 | 0.8502 | <i>Syncrin</i> | 0.5149 | 0.1294   |
| <i>Cpeb3</i>         | 0.9969 | 0.0159 | <i>Mllt11</i>  | 0.42   | 0.7912 | <i>Wwp2</i>    | 0.5172 | 0.6414   |
| <i>Sema3e</i>        | 0.9972 | 0.1692 | <i>Kpna4</i>   | 0.4211 | 0.465  | <i>Baz2a</i>   | 0.5186 | 0.5403   |
| <i>D630023f18rik</i> | Np     | 0.0013 | <i>Klf12</i>   | 0.4216 | 0.8291 | <i>Fam117b</i> | 0.5213 | 0.5143   |
| <i>Ntf5</i>          | Np     | 0.1303 | <i>Ahr</i>     | 0.4222 | 0.1354 | <i>Ctdspl</i>  | 0.522  | 0.6534   |
| <i>Foxp3</i>         | Np     | 0.1623 | <i>Pcdha5</i>  | 0.4255 | 0.7311 | <i>Ube2h</i>   | 0.5232 | 7.22E-03 |
| <i>9330159f19rik</i> | Np     | 0.1946 | <i>Klf4</i>    | 0.4301 | 0.9002 | <i>Megf11</i>  | 0.5255 | 0.2998   |
| <i>Foxl1</i>         | Np     | 0.2865 | <i>Stx17</i>   | 0.4313 | 0.3294 | <i>Elmod2</i>  | 0.5333 | 0.3966   |
| <i>Disp3</i>         | Np     | 0.4549 | <i>Dot1l</i>   | 0.4325 | 0.8738 | <i>Brd1</i>    | 0.5356 | 0.833    |

|                      |    |        |                 |        |        |                |        |          |
|----------------------|----|--------|-----------------|--------|--------|----------------|--------|----------|
| <i>Slc6a20b</i>      | Np | 0.4574 | <i>Zer1</i>     | 0.4331 | 0.8912 | <i>Maml1</i>   | 0.5366 | 0.5554   |
| <i>D17h6s53e</i>     | Np | 0.5328 | <i>Trib2</i>    | 0.4337 | 0.037  | <i>Slc35a4</i> | 0.54   | 0.3367   |
| <i>Smco1</i>         | Np | 0.5895 | <i>Smpd3</i>    | 0.4372 | 0.5774 | <i>Kcna1</i>   | 0.5411 | 0.1158   |
| <i>Fbxo43</i>        | Np | 0.6381 | <i>Xkr7</i>     | 0.4393 | 0.5984 | <i>Ppp2r5c</i> | 0.5448 | 0.0441   |
| <i>Mybphl</i>        | Np | 0.7471 | <i>Cldn1</i>    | 0.4405 | 0.093  | <i>Naa50</i>   | 0.5448 | 0.1595   |
| <i>Hoxa1</i>         | Np | 0.7561 | <i>Chfr</i>     | 0.4406 | 0.3868 | <i>Ulk2</i>    | 0.5457 | 0.2838   |
| <i>Slc6a2</i>        | Np | 0.8172 | <i>Mier3</i>    | 0.4407 | 0.3751 | <i>Eml6</i>    | 0.5458 | 0.4469   |
| <i>Zfp345</i>        | Np | 0.851  | <i>Kdm4a</i>    | 0.4409 | 0.6034 | <i>Rhobtb1</i> | 0.5486 | 0.6156   |
| <i>Gdf3</i>          | Np | 0.8568 | <i>Tubb2b</i>   | 0.441  | 0.1108 | <i>Map3k1</i>  | 0.5512 | 0.223    |
| <i>P2ry4</i>         | Np | 0.8771 | <i>Gcsh</i>     | 0.4418 | 0.6121 | <i>Agpat3</i>  | 0.5525 | 0.4481   |
| <i>Nmrk2</i>         | Np | 0.8772 | <i>Brwd3</i>    | 0.4423 | 0.2106 | <i>Hnrnpa3</i> | 0.5538 | 0.5826   |
| <i>Mrgprb1</i>       | Np | 0.898  | <i>Col2a1</i>   | 0.4439 | 0.9645 | <i>Kctd12</i>  | 0.5542 | 0.3516   |
| <i>1110018g07rik</i> | Np | Np     | <i>Schip1</i>   | 0.4455 | 0.2217 | <i>Scrt1</i>   | 0.5566 | 0.0536   |
| <i>2410066e13rik</i> | Np | Np     | <i>Fam76b</i>   | 0.4505 | 0.9612 | <i>Tef</i>     | 0.5573 | 0.3367   |
| <i>3110035e14rik</i> | Np | Np     | <i>Mga</i>      | 0.4529 | 0.1735 | <i>Slc30a4</i> | 0.5574 | 5.10E-03 |
| <i>5133401n09rik</i> | Np | Np     | <i>Nanp</i>     | 0.4556 | 0.4463 | <i>Stk38l</i>  | 0.558  | 0.4048   |
| <i>Bc023814</i>      | Np | Np     | <i>Insig1</i>   | 0.4622 | 0.5135 | <i>Map3k8</i>  | 0.5581 | 0.3268   |
| <i>D4ertd22e</i>     | Np | Np     | <i>Lpl</i>      | 0.4633 | 0.8937 | <i>Psmc6</i>   | 0.5585 | 0.4668   |
| <i>Galntl1</i>       | Np | Np     | <i>Amfr</i>     | 0.4704 | 0.4782 | <i>Zfp280d</i> | 0.5614 | 0.0539   |
| <i>Gm11818</i>       | Np | Np     | <i>Slc25a44</i> | 0.4707 | 0.3067 | <i>Csnk1g3</i> | 0.5642 | 0.0185   |
| <i>Gm1587</i>        | Np | Np     | <i>Celf2</i>    | 0.4728 | 0.6619 | <i>Dip2c</i>   | 0.5706 | 0.6982   |
| <i>Gm749</i>         | Np | Np     | <i>Jazf1</i>    | 0.4732 | 0.9184 | <i>Clint1</i>  | 0.5802 | 0.705    |
| <i>Hoxb6</i>         | Np | Np     | <i>Ap1g1</i>    | 0.4764 | 0.0025 | <i>Ncoa2</i>   | 0.5812 | 6.80E-03 |
| <i>Myst3</i>         | Np | Np     | <i>Morf4l2</i>  | 0.4767 | 0.9248 | <i>Zmat4</i>   | 0.5822 | 0.0462   |
| <i>Pax9</i>          | Np | Np     | <i>Fam134c</i>  | 0.4785 | Np     | <i>Trim33</i>  | 0.5864 | 0.0361   |
| <i>Tceb1</i>         | Np | Np     | <i>Thoc1</i>    | 0.4822 | 0.237  | <i>Snrk</i>    | 0.5888 | 0.1207   |

|                      |    |    |                 |        |        |                      |        |        |
|----------------------|----|----|-----------------|--------|--------|----------------------|--------|--------|
| <i>Tcfap4</i>        | Np | Np | <i>Ppard</i>    | 0.484  | 0.4151 | <i>Tsn</i>           | 0.5891 | 0.9903 |
| <i>Cts8</i>          | Np | Np | <i>Hmcn1</i>    | 0.4862 | 0.1138 | <i>Rictor</i>        | 0.59   | 0.2085 |
| <i>Gcnt3</i>         | Np | Np | <i>Mcl1</i>     | 0.4904 | 0.5499 | <i>Pnkd</i>          | 0.5952 | 0.6854 |
| <i>Gata5</i>         | Np | Np | <i>Rab15</i>    | 0.4915 | 0.4419 | <i>Pafah1b2</i>      | 0.597  | 0.0909 |
| <i>Aqp7</i>          | Np | Np | <i>Atp2b4</i>   | 0.4969 | 0.469  | <i>Stk38</i>         | 0.5971 | 0.5326 |
| <i>Acer1</i>         | Np | Np | <i>Rnd1</i>     | 0.4969 | 0.096  | <i>Slc25a5</i>       | 0.5984 | 0.5914 |
| <i>2810474o19rik</i> | Np | Np | <i>Dcx</i>      | 0.4995 | 0.1623 | <i>Raver2</i>        | 0.5988 | 0.4448 |
|                      |    |    | <i>Foxo3</i>    | 0.5025 | 0.2464 | <i>Kif3b</i>         | 0.6025 | 0.3937 |
|                      |    |    | <i>Rala</i>     | 0.5032 | 0.0242 | <i>Gins2</i>         | 0.6041 | 0.8816 |
|                      |    |    | <i>Chic2</i>    | 0.5041 | 0.1486 | <i>Ncf2</i>          | 0.6061 | 0.4491 |
|                      |    |    | <i>Hmgn3</i>    | 0.5056 | 0.0892 | <i>Maf</i>           | 0.6084 | 0.7132 |
|                      |    |    | <i>Arhgap36</i> | 0.5095 | 0.6416 | <i>Plxna2</i>        | 0.6091 | 0.8531 |
|                      |    |    | <i>Ing2</i>     | 0.5101 | 0.1932 | <i>Zeb2</i>          | 0.6104 | 0.5947 |
|                      |    |    | <i>Igf1</i>     | 0.5112 | 0.7392 | <i>Snx25</i>         | 0.6129 | 0.4274 |
|                      |    |    | <i>Tbc1d13</i>  | 0.5112 | 0.4444 | <i>Rpgrip1l</i>      | 0.6201 | 0.0122 |
|                      |    |    | <i>Col4a1</i>   | 0.5118 | 0.1218 | <i>2810403a07rik</i> | 0.6233 | Np     |
|                      |    |    | <i>Sfpq</i>     | 0.5122 | 0.3141 | <i>Stac</i>          | 0.624  | 0.1658 |
|                      |    |    | <i>Syncrip</i>  | 0.5149 | 0.1294 | <i>Slc8a1</i>        | 0.6305 | 0.8715 |
|                      |    |    | <i>Frat2</i>    | 0.5173 | 0.8629 | <i>Unc79</i>         | 0.6317 | 0.1939 |
|                      |    |    | <i>Hnrnpul1</i> | 0.5195 | 0.5711 | <i>Rpp40</i>         | 0.6343 | 0.4537 |
|                      |    |    | <i>Per1</i>     | 0.5257 | 0.1055 | <i>Ppp1cb</i>        | 0.6347 | 0.1017 |
|                      |    |    | <i>Frmd4a</i>   | 0.5279 | 0.1695 | <i>Mettl9</i>        | 0.6347 | 0.2645 |
|                      |    |    | <i>Slco5a1</i>  | 0.5295 | 0.2002 | <i>Mpzl3</i>         | 0.636  | 0.485  |
|                      |    |    | <i>Ccnl2</i>    | 0.5333 | 0.7513 | <i>Arf4</i>          | 0.6375 | 0.919  |
|                      |    |    | <i>Socs1</i>    | 0.5334 | 0.1202 | <i>Trpc3</i>         | 0.6389 | 0.0216 |
|                      |    |    | <i>Gpx7</i>     | 0.5343 | 0.6992 | <i>Tmem56</i>        | 0.6422 | 0.0928 |

|  |  |                 |        |        |                |        |          |
|--|--|-----------------|--------|--------|----------------|--------|----------|
|  |  | <i>Thsd4</i>    | 0.5371 | 0.1875 | <i>Rap2c</i>   | 0.645  | 0.6976   |
|  |  | <i>Scn3b</i>    | 0.5404 | 0.5723 | <i>Slc35a1</i> | 0.6462 | 0.4365   |
|  |  | <i>Dcaf12</i>   | 0.5411 | 0.0353 | <i>Phyhipl</i> | 0.6467 | 0.1939   |
|  |  | <i>Igsf1</i>    | 0.5441 | 0.9156 | <i>Ptgfrn</i>  | 0.6471 | 2.64E-03 |
|  |  | <i>Eml6</i>     | 0.5458 | 0.4469 | <i>Diras2</i>  | 0.6474 | 0.1782   |
|  |  | <i>Tnrc18</i>   | 0.5465 | 0.6703 | <i>Tbr1</i>    | 0.6522 | 0.295    |
|  |  | <i>Rhobtb1</i>  | 0.5486 | 0.6156 | <i>Chm</i>     | 0.6528 | 0.1378   |
|  |  | <i>Diablo</i>   | 0.5516 | 0.4851 | <i>Esrra</i>   | 0.654  | 0.1602   |
|  |  | <i>Has3</i>     | 0.5522 | 0.8717 | <i>Ythdf3</i>  | 0.6543 | 0.0325   |
|  |  | <i>Slc30a10</i> | 0.5544 | 0.1411 | <i>Rab8a</i>   | 0.6592 | 0.1756   |
|  |  | <i>Zfp26</i>    | 0.5565 | 0.7699 | <i>Tardbp</i>  | 0.6603 | 0.5435   |
|  |  | <i>Kctd21</i>   | 0.5569 | 0.0859 | <i>Ccng2</i>   | 0.6607 | 0.0412   |
|  |  | <i>Lif</i>      | 0.5622 | 0.1483 | <i>Papd7</i>   | 0.667  | Np       |
|  |  | <i>Ski</i>      | 0.5624 | 0.6659 | <i>Traf3</i>   | 0.6726 | 0.5687   |
|  |  | <i>Kctd15</i>   | 0.5679 | 0.5292 | <i>Rnf4</i>    | 0.6748 | 0.0975   |
|  |  | <i>Tpm1</i>     | 0.5683 | 0.7418 | <i>Asxl2</i>   | 0.6752 | 0.5741   |
|  |  | <i>Pcgf3</i>    | 0.5694 | 0.1474 | <i>Thrb</i>    | 0.6768 | 0.3179   |
|  |  | <i>Dip2c</i>    | 0.5706 | 0.6982 | <i>Nova1</i>   | 0.6772 | 0.1356   |
|  |  | <i>Col27a1</i>  | 0.5718 | 0.9228 | <i>Ndst1</i>   | 0.68   | 0.9423   |
|  |  | <i>Hdac4</i>    | 0.5726 | 0.34   | <i>Glyctk</i>  | 0.6838 | 0.3603   |
|  |  | <i>Socs7</i>    | 0.5754 | 0.802  | <i>B3galt2</i> | 0.6888 | 0.2177   |
|  |  | <i>Atad5</i>    | 0.5795 | 0.0799 | <i>Styx</i>    | 0.689  | 0.5102   |
|  |  | <i>Col4a2</i>   | 0.5797 | 0.5164 | <i>Cul4a</i>   | 0.6894 | 0.7284   |
|  |  | <i>Ddx1</i>     | 0.5841 | 0.1597 | <i>Eps8</i>    | 0.6913 | 0.1382   |
|  |  | <i>Nudt11</i>   | 0.5849 | 0.1439 | <i>Adcy1</i>   | 0.6945 | 0.0706   |
|  |  | <i>Rictor</i>   | 0.59   | 0.2085 | <i>Slc24a3</i> | 0.6954 | 0.6441   |

|  |  |                  |        |        |                 |        |          |
|--|--|------------------|--------|--------|-----------------|--------|----------|
|  |  | <i>Isl1</i>      | 0.5916 | 0.9599 | <i>Dtx2</i>     | 0.6966 | 0.9235   |
|  |  | <i>Ctdspl2</i>   | 0.5932 | 0.0672 | <i>Fxyd6</i>    | 0.6993 | 0.2904   |
|  |  | <i>Ing4</i>      | 0.5932 | 0.3851 | <i>Zfp704</i>   | 0.7049 | 0.9354   |
|  |  | <i>Nras</i>      | 0.5945 | 0.4833 | <i>Lin7c</i>    | 0.7049 | 0.4515   |
|  |  | <i>Spns1</i>     | 0.5955 | 0.1371 | <i>Coch</i>     | 0.7061 | 0.1402   |
|  |  | <i>Adcyap1r1</i> | 0.5989 | 0.616  | <i>Akt2</i>     | 0.7085 | 0.1242   |
|  |  | <i>Nkiras2</i>   | 0.5992 | 0.3132 | <i>Rbm12</i>    | 0.7092 | 0.0499   |
|  |  | <i>Adamts6</i>   | 0.5994 | 0.5215 | <i>Angpt1</i>   | 0.7093 | 0.0137   |
|  |  | <i>Abce1</i>     | 0.5994 | 0.4203 | <i>Egr2</i>     | 0.7101 | 0.0367   |
|  |  | <i>Bicd1</i>     | 0.5994 | 0.209  | <i>Med14</i>    | 0.7198 | 0.3377   |
|  |  | <i>Capn7</i>     | 0.6064 | 0.0127 | <i>Clasp2</i>   | 0.7204 | 0.0555   |
|  |  | <i>Strn3</i>     | 0.6069 | 0.147  | <i>Ahcyl1</i>   | 0.7247 | 0.3847   |
|  |  | <i>Kctd5</i>     | 0.6107 | 0.255  | <i>Map2k4</i>   | 0.726  | 0.7314   |
|  |  | <i>Nsd1</i>      | 0.616  | 0.2436 | <i>Azin1</i>    | 0.7295 | 0.0905   |
|  |  | <i>Zfp91</i>     | 0.6166 | 0.2407 | <i>Sh3bp5</i>   | 0.7337 | 0.061    |
|  |  | <i>Rnf214</i>    | 0.6196 | 0.889  | <i>Ank</i>      | 0.7359 | 0.1349   |
|  |  | <i>Ina</i>       | 0.621  | 0.0301 | <i>Ltn1</i>     | 0.7432 | 0.0996   |
|  |  | <i>Tspan14</i>   | 0.6242 | 0.5425 | <i>Zdhhc5</i>   | 0.7467 | 8.16E-03 |
|  |  | <i>Ankrd13c</i>  | 0.6246 | 0.8007 | <i>Tnrc6b</i>   | 0.7481 | 0.6574   |
|  |  | <i>Slc25a36</i>  | 0.6263 | 0.5839 | <i>Prickle1</i> | 0.7487 | 0.07     |
|  |  | <i>Eml4</i>      | 0.628  | 0.4349 | <i>Bcorl1</i>   | 0.7517 | 0.0845   |
|  |  | <i>Ppp1cb</i>    | 0.6347 | 0.1017 | <i>Slc6a1</i>   | 0.7535 | 0.7474   |
|  |  | <i>Rfx7</i>      | 0.6382 | 0.5172 | <i>Pla2g15</i>  | 0.7561 | 0.5826   |
|  |  | <i>Etv4</i>      | 0.6385 | 0.1035 | <i>Stk11</i>    | 0.7589 | 0.9613   |
|  |  | <i>Osbp</i>      | 0.6444 | 0.3662 | <i>Taok1</i>    | 0.7595 | 0.1997   |
|  |  | <i>Pcdha6</i>    | 0.6507 | 0.4471 | <i>Rpl28</i>    | 0.7621 | 0.2406   |

|  |  |                 |        |        |                |        |          |
|--|--|-----------------|--------|--------|----------------|--------|----------|
|  |  | <i>Hdgf</i>     | 0.6534 | 0.2425 | <i>Cops2</i>   | 0.767  | 0.1024   |
|  |  | <i>Smarcc1</i>  | 0.6542 | 0.0232 | <i>Mxd1</i>    | 0.7692 | 0.0719   |
|  |  | <i>Ythdf3</i>   | 0.6543 | 0.0325 | <i>Gjc1</i>    | 0.7699 | 0.5118   |
|  |  | <i>Ank1</i>     | 0.655  | 0.3392 | <i>Paip1</i>   | 0.7752 | 0.5279   |
|  |  | <i>Mest</i>     | 0.6566 | 0.2819 | <i>Zfp710</i>  | 0.7767 | 0.3143   |
|  |  | <i>Rap1gds1</i> | 0.6579 | 0.2987 | <i>Sv2a</i>    | 0.7791 | 0.2101   |
|  |  | <i>Tll1</i>     | 0.6585 | 0.0819 | <i>Rims3</i>   | 0.7813 | 5.27E-03 |
|  |  | <i>Tspan4</i>   | 0.6608 | 0.1574 | <i>ldh1</i>    | 0.7824 | 0.9207   |
|  |  | <i>Col16a1</i>  | 0.6612 | 0.0442 | <i>Wnt7a</i>   | 0.7831 | 0.4356   |
|  |  | <i>Nfat5</i>    | 0.6666 | 0.9295 | <i>Gpam</i>    | 0.7834 | 0.8206   |
|  |  | <i>Cdc7</i>     | 0.667  | 0.5367 | <i>Stk35</i>   | 0.784  | 0.3639   |
|  |  | <i>Col9a1</i>   | 0.6695 | 0.7765 | <i>Epha4</i>   | 0.785  | 1.99E-06 |
|  |  | <i>Ctnnd1</i>   | 0.6697 | 0.1018 | <i>Chst10</i>  | 0.7873 | 0.7064   |
|  |  | <i>Camta1</i>   | 0.6726 | 0.0088 | <i>Dnajb5</i>  | 0.7884 | 0.0691   |
|  |  | <i>Traf3</i>    | 0.6726 | 0.5687 | <i>Furin</i>   | 0.7905 | 0.4408   |
|  |  | <i>Bcl2l2</i>   | 0.676  | 0.9946 | <i>Zc3h3</i>   | 0.7908 | 0.0572   |
|  |  | <i>Palm2</i>    | 0.6788 | Np     | <i>Neur13</i>  | 0.7969 | 0.4242   |
|  |  | <i>Ndst1</i>    | 0.68   | 0.9423 | <i>Ppp4r2</i>  | 0.799  | 0.0854   |
|  |  | <i>Ccdc88a</i>  | 0.6813 | 0.5501 | <i>Mbd6</i>    | 0.8008 | 0.3856   |
|  |  | <i>Cspg4</i>    | 0.6837 | 0.0802 | <i>Prkaa1</i>  | 0.8071 | 0.9042   |
|  |  | <i>Commd2</i>   | 0.6841 | 0.5347 | <i>Tcf4</i>    | 0.8073 | 0.1086   |
|  |  | <i>Cps1</i>     | 0.687  | 0.557  | <i>Abhd6</i>   | 0.8139 | 0.2465   |
|  |  | <i>Prr3</i>     | 0.6887 | 0.4067 | <i>Zfp326</i>  | 0.8177 | 0.1331   |
|  |  | <i>Erp29</i>    | 0.6924 | 0.3879 | <i>Arf6</i>    | 0.8192 | 0.3895   |
|  |  | <i>Snx4</i>     | 0.6925 | 0.6493 | <i>Slc39a5</i> | 0.8202 | 0.934    |
|  |  | <i>Rarb</i>     | 0.6932 | 0.656  | <i>Ash1l</i>   | 0.8218 | 0.1159   |



|  |  |                 |        |        |                 |        |          |
|--|--|-----------------|--------|--------|-----------------|--------|----------|
|  |  | <i>Nkrf</i>     | 0.6948 | 0.2534 | <i>B3galnt2</i> | 0.8269 | 0.3186   |
|  |  | <i>Ppm1d</i>    | 0.7034 | 0.4591 | <i>Otud4</i>    | 0.8386 | 0.1517   |
|  |  | <i>Zfp704</i>   | 0.7049 | 0.9354 | <i>Mbnl2</i>    | 0.8387 | 0.0159   |
|  |  | <i>Fos</i>      | 0.7049 | 0.0739 | <i>Pde1b</i>    | 0.8424 | 0.7342   |
|  |  | <i>Vps25</i>    | 0.7059 | 0.1349 | <i>Tab3</i>     | 0.8425 | 0.0378   |
|  |  | <i>Mapkbp1</i>  | 0.7066 | 0.7862 | <i>Srsf6</i>    | 0.8426 | 0.276    |
|  |  | <i>Cbx5</i>     | 0.7097 | 0.4424 | <i>Ppm1e</i>    | 0.8434 | 0.7212   |
|  |  | <i>Pcdha10</i>  | 0.7114 | Np     | <i>Fam78a</i>   | 0.8441 | 0.2865   |
|  |  | <i>Zfyve26</i>  | 0.7141 | 0.3107 | <i>Nab2</i>     | 0.8452 | 0.1434   |
|  |  | <i>lbsp</i>     | 0.7213 | 0.4849 | <i>Fam126b</i>  | 0.8453 | 8.27E-03 |
|  |  | <i>Arfgef2</i>  | 0.7216 | 0.0683 | <i>Esrrg</i>    | 0.8458 | 0.2476   |
|  |  | <i>Ubfd1</i>    | 0.7219 | 0.0721 | <i>Ddx3x</i>    | 0.8464 | 0.7868   |
|  |  | <i>Ankrd52</i>  | 0.7221 | 0.1559 | <i>Zbtb37</i>   | 0.8485 | 0.7076   |
|  |  | <i>Adamts17</i> | 0.7249 | 0.849  | <i>Rgs8</i>     | 0.8516 | 1.34E-03 |
|  |  | <i>Map2k4</i>   | 0.726  | 0.7314 | <i>Gsk3b</i>    | 0.8548 | 0.053    |
|  |  | <i>Mfap3</i>    | 0.7268 | 0.139  | <i>Cdc42</i>    | 0.8564 | 0.6928   |
|  |  | <i>Nap1l3</i>   | 0.7297 | 0.1302 | <i>Dr1</i>      | 0.8581 | 0.401    |
|  |  | <i>Ptprk</i>    | 0.7298 | 0.0189 | <i>Acsf6</i>    | 0.8598 | 0.7496   |
|  |  | <i>Parg</i>     | 0.7341 | 0.0796 | <i>Arhgef18</i> | 0.8614 | 0.0663   |
|  |  | <i>Mrpl35</i>   | 0.7349 | 0.133  | <i>Dnajb1</i>   | 0.863  | 0.1488   |
|  |  | <i>Bsdcl1</i>   | 0.741  | 0.31   | <i>Glce</i>     | 0.8646 | 0.6269   |
|  |  | <i>Zdhhc5</i>   | 0.7467 | 0.0082 | <i>Esf1</i>     | 0.8668 | 0.9918   |
|  |  | <i>Tnrc6b</i>   | 0.7481 | 0.6574 | <i>Cpne8</i>    | 0.8718 | 0.9158   |
|  |  | <i>Mbtd1</i>    | 0.7504 | 0.9139 | <i>Stk40</i>    | 0.8767 | 0.181    |
|  |  | <i>Dicer1</i>   | 0.7506 | 0.6452 | <i>Tbx3</i>     | 0.8785 | 0.2969   |
|  |  | <i>Gng2</i>     | 0.7519 | 0.7651 | <i>Wif1</i>     | 0.8834 | 0.1627   |

|  |  |                 |        |        |                |        |          |
|--|--|-----------------|--------|--------|----------------|--------|----------|
|  |  | <i>Rev3l</i>    | 0.7555 | 0.0729 | <i>Grm5</i>    | 0.8849 | 0.9821   |
|  |  | <i>Iffo2</i>    | 0.7561 | 0.9178 | <i>Ankrd28</i> | 0.8877 | 0.5869   |
|  |  | <i>Tmem135</i>  | 0.7565 | 0.3394 | <i>Herpud2</i> | 0.8939 | 0.0463   |
|  |  | <i>Cav2</i>     | 0.7596 | 0.2998 | <i>Smurf1</i>  | 0.8949 | 0.5934   |
|  |  | <i>Hcn1</i>     | 0.7609 | 0.5502 | <i>Fam98a</i>  | 0.9004 | 0.7439   |
|  |  | <i>Islr2</i>    | 0.7629 | 0.6905 | <i>Sox6</i>    | 0.901  | 0.8795   |
|  |  | <i>Nufip2</i>   | 0.7659 | 0.0679 | <i>Ube2g1</i>  | 0.9037 | 0.0127   |
|  |  | <i>Tmem86a</i>  | 0.7692 | 0.0931 | <i>Csdc2</i>   | 0.9061 | 0.4211   |
|  |  | <i>Tmem132a</i> | 0.7735 | 0.498  | <i>Cse1l</i>   | 0.9084 | 0.0438   |
|  |  | <i>Dtx4</i>     | 0.779  | 0.4934 | <i>Fam168a</i> | 0.9095 | 0.4431   |
|  |  | <i>Col7a1</i>   | 0.7803 | 0.4013 | <i>Entpd7</i>  | 0.9115 | 0.1226   |
|  |  | <i>Stk35</i>    | 0.784  | 0.3639 | <i>Nf1</i>     | 0.9145 | 0.8261   |
|  |  | <i>Kcnip2</i>   | 0.7842 | 0.5592 | <i>Fndc5</i>   | 0.9162 | 0.8211   |
|  |  | <i>Slc7a1</i>   | 0.7847 | 0.0316 | <i>Bcl11b</i>  | 0.9167 | 0.6817   |
|  |  | <i>Atad2b</i>   | 0.7848 | 0.8929 | <i>Lmbr1l</i>  | 0.9177 | 0.8602   |
|  |  | <i>Ypel2</i>    | 0.785  | 0.0637 | <i>Mtmr4</i>   | 0.9182 | 0.036    |
|  |  | <i>Sh3rf3</i>   | 0.7887 | 0.6457 | <i>Htr2c</i>   | 0.9226 | 0.5208   |
|  |  | <i>Adam19</i>   | 0.7901 | 0.022  | <i>Hlf</i>     | 0.9241 | 4.90E-03 |
|  |  | <i>Phc1</i>     | 0.7929 | 0.9143 | <i>Zmym5</i>   | 0.9242 | 0.6436   |
|  |  | <i>Pcdha8</i>   | 0.7952 | 0.1689 | <i>Vegfc</i>   | 0.9293 | 0.4618   |
|  |  | <i>Epc1</i>     | 0.7991 | 0.5859 | <i>Impa2</i>   | 0.9346 | 0.3835   |
|  |  | <i>Kctd20</i>   | 0.8025 | 0.3273 | <i>Tmem218</i> | 0.9429 | 0.2061   |
|  |  | <i>Tcf4</i>     | 0.8073 | 0.1086 | <i>Prkar2b</i> | 0.9439 | 0.6809   |
|  |  | <i>Zfp532</i>   | 0.8113 | 0.4505 | <i>Zbtb4</i>   | 0.9495 | 0.4113   |
|  |  | <i>Ap4e1</i>    | 0.8132 | 0.9372 | <i>Cep170</i>  | 0.9558 | 0.0904   |
|  |  | <i>Cdkn1a</i>   | 0.8138 | 0.5044 | <i>Fnbp1l</i>  | 0.9564 | 0.4069   |

|  |  |                |        |        |                 |        |        |
|--|--|----------------|--------|--------|-----------------|--------|--------|
|  |  | <i>Scml2</i>   | 0.8194 | 0.4096 | <i>Dnmt3a</i>   | 0.9639 | 0.821  |
|  |  | <i>Btg2</i>    | 0.8252 | 0.6952 | <i>Tsc22d2</i>  | 0.9687 | 0.1633 |
|  |  | <i>Fam131b</i> | 0.8254 | 0.3487 | <i>Kdm5b</i>    | 0.9781 | 0.2609 |
|  |  | <i>Tmem127</i> | 0.827  | 0.0763 | <i>Mapkapk2</i> | 0.9789 | 0.736  |
|  |  | <i>Npas4</i>   | 0.8287 | 0.0689 | <i>Zbtb7a</i>   | 0.9804 | 0.0443 |
|  |  | <i>Unk</i>     | 0.8315 | 0.8024 | <i>Zdhhc3</i>   | 0.9807 | 0.6435 |
|  |  | <i>Jarid2</i>  | 0.8346 | 0.0231 | <i>Lhfpl2</i>   | 0.9822 | 0.9773 |
|  |  | <i>Otud4</i>   | 0.8386 | 0.1517 | <i>Chd9</i>     | 0.9894 | 0.5223 |
|  |  | <i>Yy1</i>     | 0.8389 | 0.1308 | <i>Lrrn3</i>    | 0.9922 | 0.9394 |
|  |  | <i>Lsm11</i>   | 0.839  | 0.0496 | <i>Zfp385a</i>  | 0.9923 | 0.3742 |
|  |  | <i>Fem1b</i>   | 0.8426 | 0.1764 | <i>Hmgcl1</i>   | 0.9955 | 0.3899 |
|  |  | <i>Ppm1e</i>   | 0.8434 | 0.7212 | <i>Gnat1</i>    | Np     | 0.0278 |
|  |  | <i>Fam126b</i> | 0.8453 | 0.0083 | <i>Klhl10</i>   | Np     | 0.2388 |
|  |  | <i>Ddx3x</i>   | 0.8464 | 0.7868 | <i>Otc</i>      | Np     | 0.268  |
|  |  | <i>Morf4l1</i> | 0.8465 | 0.5674 | <i>Slc17a3</i>  | Np     | 0.3497 |
|  |  | <i>Arnt</i>    | 0.8518 | 0.8303 | <i>Esrp1</i>    | Np     | 0.3732 |
|  |  | <i>N4bp2l1</i> | 0.8518 | 0.4809 | <i>Spata16</i>  | Np     | 0.3905 |
|  |  | <i>Gsk3b</i>   | 0.8548 | 0.053  | <i>Aqp2</i>     | Np     | 0.554  |
|  |  | <i>Cdc42</i>   | 0.8564 | 0.6928 | <i>Nr1i3</i>    | Np     | 0.5901 |
|  |  | <i>Gfod1</i>   | 0.858  | 0.033  | <i>Gdf6</i>     | Np     | 0.6244 |
|  |  | <i>Trip12</i>  | 0.8589 | 0.0669 | <i>Afm</i>      | Np     | 0.8212 |
|  |  | <i>Ubtf</i>    | 0.8599 | 0.3963 | <i>Cngb3</i>    | Np     | 0.8285 |
|  |  | <i>Lcorl</i>   | 0.8608 | 0.5537 | <i>Dmrt3</i>    | Np     | 0.8568 |
|  |  | <i>Taf5</i>    | 0.8609 | 0.3829 | <i>Cd69</i>     | Np     | 0.8568 |
|  |  | <i>Prpf40a</i> | 0.8618 | 0.4094 | <i>Sgcg</i>     | Np     | 0.9391 |
|  |  | <i>Nrbp1</i>   | 0.863  | 0.3383 | <i>Phf15</i>    | Np     | Np     |

|  |  |               |        |        |                      |    |    |
|--|--|---------------|--------|--------|----------------------|----|----|
|  |  | <i>Hif3a</i>  | 0.8679 | 0.1066 | <i>Phf17</i>         | Np | Np |
|  |  | <i>Cisd2</i>  | 0.8703 | 0.3448 | <i>4732418c07rik</i> | Np | Np |
|  |  | <i>Cpne8</i>  | 0.8718 | 0.9158 | <i>Csda</i>          | Np | Np |
|  |  | <i>Slmap</i>  | 0.8748 | 0.2353 | <i>Jhdm1d</i>        | Np | Np |
|  |  | <i>Hbegf</i>  | 0.8753 | 0.46   | <i>Mll1</i>          | Np | Np |
|  |  | <i>Arl4a</i>  | 0.876  | 0.0297 | <i>Pppde1</i>        | Np | Np |
|  |  | <i>Setdb1</i> | 0.883  | 0.5868 | <i>Prosapip1</i>     | Np | Np |
|  |  | <i>Col5a1</i> | 0.8853 | 0.0349 | <i>Zfp295</i>        | Np | Np |
|  |  | <i>Sirt1</i>  | 0.8866 | 0.6204 | <i>Au019823</i>      | Np | Np |
|  |  | <i>Fam57b</i> | 0.8872 | 0.1797 | <i>Au022870</i>      | Np | Np |
|  |  | <i>Prkra</i>  | 0.8886 | 0.1782 | <i>Bai3</i>          | Np | Np |
|  |  | <i>Cenpb</i>  | 0.8907 | 0.1608 | <i>Bc024479</i>      | Np | Np |
|  |  | <i>Pigm</i>   | 0.8932 | 0.8269 | <i>D0h4s114</i>      | Np | Np |
|  |  | <i>Zbtb43</i> | 0.8949 | 0.6454 | <i>D19wsu162e</i>    | Np | Np |
|  |  | <i>Gmfb</i>   | 0.8957 | 0.4287 | <i>D4bwg0951e</i>    | Np | Np |
|  |  | <i>Rbfox2</i> | 0.9108 | 0.5495 | <i>D4ertd22e</i>     | Np | Np |
|  |  | <i>Entpd7</i> | 0.9115 | 0.1226 | <i>Obfc2a</i>        | Np | Np |
|  |  | <i>Bcl11b</i> | 0.9167 | 0.6817 | <i>Eif3j</i>         | Np | Np |
|  |  | <i>Dgkh</i>   | 0.917  | 0.269  | <i>Hnrpd1</i>        | Np | Np |
|  |  | <i>Arf2</i>   | 0.9174 | 0.2316 | <i>1190002n15rik</i> | Np | Np |
|  |  | <i>Mtmr4</i>  | 0.9182 | 0.036  | <i>1200016b10rik</i> | Np | Np |
|  |  | <i>Htr2c</i>  | 0.9226 | 0.5208 | <i>2610030h06rik</i> | Np | Np |
|  |  | <i>Stau1</i>  | 0.9256 | 0.0854 | <i>2900011o08rik</i> | Np | Np |
|  |  | <i>Fubp1</i>  | 0.9277 | 0.8239 | <i>Bc017647</i>      | Np | Np |
|  |  | <i>Srgap2</i> | 0.9304 | 0.6118 | <i>Bc032203</i>      | Np | Np |
|  |  | <i>Ank3</i>   | 0.9311 | 0.2258 | <i>Btbd12</i>        | Np | Np |

|  |  |                |        |        |                    |    |    |
|--|--|----------------|--------|--------|--------------------|----|----|
|  |  | <i>Pdik1l</i>  | 0.9328 | 0.9887 | <i>D18ertd653e</i> | Np | Np |
|  |  | <i>Dennd1b</i> | 0.933  | 0.3013 | <i>Dos</i>         | Np | Np |
|  |  | <i>Robo1</i>   | 0.9335 | 0.5327 | <i>Eif2c4</i>      | Np | Np |
|  |  | <i>Fam184b</i> | 0.9369 | 0.3143 | <i>Fam123b</i>     | Np | Np |
|  |  | <i>Col5a3</i>  | 0.9384 | 0.8099 | <i>Fam18b</i>      | Np | Np |
|  |  | <i>Pitpnb</i>  | 0.9384 | 0.9743 | <i>Hoxd10</i>      | Np | Np |
|  |  | <i>Pdgfb</i>   | 0.9391 | 0.9533 | <i>Pppde2</i>      | Np | Np |
|  |  | <i>Thoc2</i>   | 0.9391 | 0.8661 | <i>Tcfap2a</i>     | Np | Np |
|  |  | <i>Col11a1</i> | 0.951  | 0.2577 | <i>Tcfap2c</i>     | Np | Np |
|  |  | <i>Csnk1g1</i> | 0.9525 | 0.6176 | <i>Tmem188</i>     | Np | Np |
|  |  | <i>Eif4e2</i>  | 0.9572 | 0.3401 | <i>Zfp238</i>      | Np | Np |
|  |  | <i>Ppip5k2</i> | 0.9576 | 0.123  | <i>Au040829</i>    | Np | Np |
|  |  | <i>Purg</i>    | 0.9581 | 0.759  | <i>Bc065085</i>    | Np | Np |
|  |  | <i>Urm1</i>    | 0.959  | 0.2577 |                    |    |    |
|  |  | <i>Kif26b</i>  | 0.9626 | 0.5019 |                    |    |    |
|  |  | <i>Dnmt3a</i>  | 0.9639 | 0.821  |                    |    |    |
|  |  | <i>Sh3bp5l</i> | 0.967  | 0.4563 |                    |    |    |
|  |  | <i>Rab14</i>   | 0.9686 | 0.1631 |                    |    |    |
|  |  | <i>Pex5</i>    | 0.9691 | 0.1515 |                    |    |    |
|  |  | <i>Dio2</i>    | 0.9703 | 0.6056 |                    |    |    |
|  |  | <i>Hapln1</i>  | 0.976  | 0.6748 |                    |    |    |
|  |  | <i>Pdgfa</i>   | 0.9761 | 0.9096 |                    |    |    |
|  |  | <i>Kdm5b</i>   | 0.9781 | 0.2609 |                    |    |    |
|  |  | <i>Plagl2</i>  | 0.9794 | 0.1878 |                    |    |    |
|  |  | <i>Klhl28</i>  | 0.9805 | 0.0012 |                    |    |    |
|  |  | <i>Gcc2</i>    | 0.989  | 0.1167 |                    |    |    |

|  |  |                      |        |        |  |  |  |
|--|--|----------------------|--------|--------|--|--|--|
|  |  | <i>Tmem151b</i>      | 0.9907 | 0.4088 |  |  |  |
|  |  | <i>Foxj2</i>         | 0.9928 | 0.303  |  |  |  |
|  |  | <i>Cpeb3</i>         | 0.9969 | 0.0159 |  |  |  |
|  |  | <i>Rnf19a</i>        | 0.9996 | 0.6797 |  |  |  |
|  |  | <i>Ptx3</i>          | Np     | 0.013  |  |  |  |
|  |  | <i>4931428f04rik</i> | Np     | 0.0775 |  |  |  |
|  |  | <i>Tbx21</i>         | Np     | 0.1284 |  |  |  |
|  |  | <i>Trim63</i>        | Np     | 0.1319 |  |  |  |
|  |  | <i>Fasl</i>          | Np     | 0.1332 |  |  |  |
|  |  | <i>Pou4f1</i>        | Np     | 0.1482 |  |  |  |
|  |  | <i>D630045j12rik</i> | Np     | 0.1853 |  |  |  |
|  |  | <i>Gm14137</i>       | Np     | 0.2324 |  |  |  |
|  |  | <i>Icos</i>          | Np     | 0.2709 |  |  |  |
|  |  | <i>Mat1a</i>         | Np     | 0.3263 |  |  |  |
|  |  | <i>Loxl4</i>         | Np     | 0.445  |  |  |  |
|  |  | <i>Calcr</i>         | Np     | 0.4611 |  |  |  |
|  |  | <i>Tectb</i>         | Np     | 0.5287 |  |  |  |
|  |  | <i>B230219d22rik</i> | Np     | 0.5304 |  |  |  |
|  |  | <i>Phldb3</i>        | Np     | 0.5757 |  |  |  |
|  |  | <i>G6pc</i>          | Np     | 0.681  |  |  |  |
|  |  | <i>4921536k21rik</i> | Np     | 0.6941 |  |  |  |
|  |  | <i>4931406p16rik</i> | Np     | 0.7262 |  |  |  |
|  |  | <i>9530068e07rik</i> | Np     | 0.7906 |  |  |  |
|  |  | <i>Lmx1a</i>         | Np     | 0.8145 |  |  |  |
|  |  | <i>Slc6a2</i>        | Np     | 0.8172 |  |  |  |
|  |  | <i>Atp1b4</i>        | Np     | 0.8568 |  |  |  |

|  |  |                      |    |        |  |  |  |
|--|--|----------------------|----|--------|--|--|--|
|  |  | <i>Ifng</i>          | Np | 0.8768 |  |  |  |
|  |  | <i>Hnf4g</i>         | Np | 0.898  |  |  |  |
|  |  | <i>Tmc5</i>          | Np | 0.9005 |  |  |  |
|  |  | <i>4921524j17rik</i> | Np | 0.9443 |  |  |  |
|  |  | <i>En1</i>           | Np | 0.968  |  |  |  |
|  |  | <i>Hoxc13</i>        | Np | 0.9792 |  |  |  |
|  |  | <i>4833424o15rik</i> | Np | Np     |  |  |  |
|  |  | <i>Csda</i>          | Np | Np     |  |  |  |
|  |  | <i>Drd1a</i>         | Np | Np     |  |  |  |
|  |  | <i>Pvrl1</i>         | Np | Np     |  |  |  |
|  |  | <i>Rod1</i>          | Np | Np     |  |  |  |
|  |  | <i>Smek2</i>         | Np | Np     |  |  |  |
|  |  | <i>Tcfec</i>         | Np | Np     |  |  |  |
|  |  | <i>2310046o06rik</i> | Np | Np     |  |  |  |
|  |  | <i>2400001e08rik</i> | Np | Np     |  |  |  |
|  |  | <i>2810046i04rik</i> | Np | Np     |  |  |  |
|  |  | <i>4933439f18rik</i> | Np | Np     |  |  |  |
|  |  | <i>C77370</i>        | Np | Np     |  |  |  |
|  |  | <i>D0h4s114</i>      | Np | Np     |  |  |  |
|  |  | <i>D19wsu162e</i>    | Np | Np     |  |  |  |
|  |  | <i>D3bwg0562e</i>    | Np | Np     |  |  |  |
|  |  | <i>Eomes</i>         | Np | Np     |  |  |  |
|  |  | <i>Fam123b</i>       | Np | Np     |  |  |  |
|  |  | <i>Fam70a</i>        | Np | Np     |  |  |  |
|  |  | <i>Ifi30</i>         | Np | Np     |  |  |  |
|  |  | <i>Smcr7l</i>        | Np | Np     |  |  |  |

|  |  |                      |    |    |  |  |  |
|--|--|----------------------|----|----|--|--|--|
|  |  | <i>Spnb2</i>         | Np | Np |  |  |  |
|  |  | <i>Srcrb4d</i>       | Np | Np |  |  |  |
|  |  | <i>Tcfeb</i>         | Np | Np |  |  |  |
|  |  | <i>6720456h20rik</i> | Np | Np |  |  |  |
|  |  | <i>8030411f24rik</i> | Np | Np |  |  |  |
|  |  | <i>8430427h17rik</i> | Np | Np |  |  |  |
|  |  | <i>Au019823</i>      | Np | Np |  |  |  |
|  |  | <i>Bat2l2</i>        | Np | Np |  |  |  |
|  |  | <i>C030046e11rik</i> | Np | Np |  |  |  |
|  |  | <i>C030046i01rik</i> | Np | Np |  |  |  |
|  |  | <i>Epb4.1l4b</i>     | Np | Np |  |  |  |
|  |  | <i>Fam116a</i>       | Np | Np |  |  |  |
|  |  | <i>Gcap14</i>        | Np | Np |  |  |  |
|  |  | <i>Hiatl1</i>        | Np | Np |  |  |  |
|  |  | <i>Lep</i>           | Np | Np |  |  |  |
|  |  | <i>Orf61</i>         | Np | Np |  |  |  |
|  |  | <i>Spna2</i>         | Np | Np |  |  |  |
|  |  | <i>Tcfap2c</i>       | Np | Np |  |  |  |
|  |  | <i>Tmem48</i>        | Np | Np |  |  |  |
|  |  | <i>Zfp191</i>        | Np | Np |  |  |  |
|  |  | <i>Bc035295</i>      | Np | Np |  |  |  |
|  |  | <i>Bc060632</i>      | Np | Np |  |  |  |
|  |  | <i>Bc065085</i>      | Np | Np |  |  |  |
|  |  | <i>C330019g07rik</i> | Np | Np |  |  |  |
|  |  | <i>Mtap6</i>         | Np | Np |  |  |  |



**Table S4.** Significantly enriched KEGG pathways from all downregulated miRNAs target genes

| Description                                              | Overlap | pValue   | FDR      |
|----------------------------------------------------------|---------|----------|----------|
| Focal adhesion                                           | 106     | 8.94E-10 | 8.94E-08 |
| Pathways in cancer                                       | 177     | 3.18E-09 | 1.06E-07 |
| FoxO signaling pathway                                   | 74      | 3.71E-09 | 1.06E-07 |
| Proteoglycans in cancer                                  | 103     | 4.23E-09 | 1.06E-07 |
| MAPK signaling pathway                                   | 120     | 1.81E-08 | 3.62E-07 |
| Axon guidance                                            | 70      | 2.59E-08 | 4.32E-07 |
| Regulation of actin cytoskeleton                         | 104     | 8.47E-08 | 1.21E-06 |
| PI3K-Akt signaling pathway                               | 153     | 2.27E-07 | 2.84E-06 |
| Ras signaling pathway                                    | 106     | 7.35E-07 | 8.17E-06 |
| Thyroid hormone signaling pathway                        | 61      | 1.27E-06 | 1.27E-05 |
| Signaling pathways regulating pluripotency of stem cells | 70      | 1.63E-06 | 1.48E-05 |
| ErbB signaling pathway                                   | 47      | 5.92E-06 | 4.93E-05 |
| Neurotrophin signaling pathway                           | 61      | 7.53E-06 | 5.79E-05 |
| Cell cycle                                               | 62      | 8.85E-06 | 5.91E-05 |
| TNF signaling pathway                                    | 56      | 8.86E-06 | 5.91E-05 |
| Adherens junction                                        | 41      | 1.01E-05 | 6.31E-05 |
| Prostate cancer                                          | 47      | 1.33E-05 | 7.82E-05 |
| HTLV-I infection                                         | 120     | 1.53E-05 | 0.000085 |
| Endometrial cancer                                       | 31      | 1.72E-05 | 9.05E-05 |
| Hippo signaling pathway                                  | 72      | 0.000024 | 0.00012  |
| HIF-1 signaling pathway                                  | 54      | 3.45E-05 | 0.000164 |
| Renal cell carcinoma                                     | 37      | 4.65E-05 | 0.000211 |
| Colorectal cancer                                        | 35      | 6.45E-05 | 0.000272 |
| Insulin resistance                                       | 54      | 6.52E-05 | 0.000272 |
| DNA replication                                          | 22      | 9.53E-05 | 0.000381 |
| Dorso-ventral axis formation                             | 17      | 0.000148 | 0.000563 |
| Choline metabolism in cancer                             | 49      | 0.000152 | 0.000563 |
| Rap1 signaling pathway                                   | 91      | 0.000192 | 0.000686 |
| Toxoplasmosis                                            | 53      | 0.000249 | 0.000859 |
| Sphingolipid signaling pathway                           | 57      | 0.000287 | 0.000957 |
| Fanconi anemia pathway                                   | 28      | 0.000314 | 0.001006 |
| Bacterial invasion of epithelial cells                   | 39      | 0.000322 | 0.001006 |
| Hepatitis B                                              | 65      | 0.000343 | 0.001009 |
| Non-small cell lung cancer                               | 30      | 0.000343 | 0.001009 |
| Pancreatic cancer                                        | 34      | 0.000377 | 0.001077 |
| Epstein-Barr virus infection                             | 90      | 0.000396 | 0.0011   |
| AMPK signaling pathway                                   | 58      | 0.000516 | 0.001395 |
| Ubiquitin mediated proteolysis                           | 63      | 0.000592 | 0.001558 |
| VEGF signaling pathway                                   | 31      | 0.000632 | 0.001605 |
| Glioma                                                   | 33      | 0.000642 | 0.001605 |
| Salmonella infection                                     | 38      | 0.000733 | 0.001788 |
| Endocytosis                                              | 111     | 0.000764 | 0.001819 |
| Platelet activation                                      | 58      | 0.000827 | 0.001923 |
| Steroid biosynthesis                                     | 13      | 0.000849 | 0.00193  |
| Phosphatidylinositol signaling system                    | 45      | 0.000949 | 0.002109 |
| N-Glycan biosynthesis                                    | 26      | 0.00102  | 0.002217 |
| Lysosome                                                 | 55      | 0.00106  | 0.002255 |

|                                                       |    |         |          |
|-------------------------------------------------------|----|---------|----------|
| Insulin signaling pathway                             | 61 | 0.00125 | 0.002592 |
| Small cell lung cancer                                | 40 | 0.00127 | 0.002592 |
| ECM-receptor interaction                              | 41 | 0.00141 | 0.002765 |
| Fc gamma R-mediated phagocytosis                      | 41 | 0.00141 | 0.002765 |
| Osteoclast differentiation                            | 55 | 0.00166 | 0.003151 |
| Gap junction                                          | 40 | 0.00167 | 0.003151 |
| Adrenergic signaling in cardiomyocytes                | 64 | 0.00218 | 0.004037 |
| Toll-like receptor signaling pathway                  | 45 | 0.0026  | 0.004727 |
| p53 signaling pathway                                 | 32 | 0.0028  | 0.004965 |
| Progesterone-mediated oocyte maturation               | 40 | 0.00283 | 0.004965 |
| Regulation of lipolysis in adipocytes                 | 28 | 0.00302 | 0.005186 |
| Melanogenesis                                         | 44 | 0.00306 | 0.005186 |
| Leishmaniasis                                         | 31 | 0.00333 | 0.00555  |
| Chronic myeloid leukemia                              | 34 | 0.00351 | 0.005754 |
| Apoptosis                                             | 37 | 0.00361 | 0.005823 |
| Wnt signaling pathway                                 | 60 | 0.00392 | 0.006222 |
| NOD-like receptor signaling pathway                   | 28 | 0.00414 | 0.006469 |
| cAMP signaling pathway                                | 79 | 0.00424 | 0.0065   |
| Alanine, aspartate and glutamate metabolism           | 20 | 0.00429 | 0.0065   |
| Central carbon metabolism in cancer                   | 31 | 0.00444 | 0.006627 |
| mTOR signaling pathway                                | 29 | 0.0047  | 0.006912 |
| GnRH signaling pathway                                | 39 | 0.00543 | 0.007786 |
| Adipocytokine signaling pathway                       | 33 | 0.00545 | 0.007786 |
| RNA degradation                                       | 37 | 0.00593 | 0.008352 |
| Notch signaling pathway                               | 24 | 0.00612 | 0.0085   |
| Oxytocin signaling pathway                            | 64 | 0.00639 | 0.008753 |
| Phospholipase D signaling pathway                     | 59 | 0.00648 | 0.008757 |
| Jak-STAT signaling pathway                            | 65 | 0.00657 | 0.00876  |
| B cell receptor signaling pathway                     | 33 | 0.00704 | 0.009263 |
| Estrogen signaling pathway                            | 42 | 0.00817 | 0.01061  |
| Rheumatoid arthritis                                  | 36 | 0.00882 | 0.011111 |
| Glutamatergic synapse                                 | 48 | 0.00889 | 0.011111 |
| Prolactin signaling pathway                           | 33 | 0.009   | 0.011111 |
| Pertussis                                             | 33 | 0.009   | 0.011111 |
| cGMP-PKG signaling pathway                            | 68 | 0.00966 | 0.01178  |
| Sphingolipid metabolism                               | 23 | 0.00999 | 0.012036 |
| Peroxisome                                            | 36 | 0.011   | 0.013095 |
| Fc epsilon RI signaling pathway                       | 30 | 0.0116  | 0.013647 |
| Bladder cancer                                        | 20 | 0.0125  | 0.014368 |
| Inositol phosphate metabolism                         | 31 | 0.0125  | 0.014368 |
| Synaptic vesicle cycle                                | 28 | 0.0127  | 0.014432 |
| Other types of O-glycan biosynthesis                  | 16 | 0.013   | 0.014607 |
| One carbon pool by folate                             | 11 | 0.0134  | 0.014889 |
| Hypertrophic cardiomyopathy (HCM)                     | 36 | 0.0137  | 0.015055 |
| TGF-beta signaling pathway                            | 36 | 0.0168  | 0.018261 |
| Mismatch repair                                       | 12 | 0.018   | 0.019355 |
| Influenza A                                           | 66 | 0.0191  | 0.019896 |
| Glycerophospholipid metabolism                        | 39 | 0.0191  | 0.019896 |
| Long-term depression                                  | 27 | 0.0191  | 0.019896 |
| Glycosylphosphatidylinositol(GPI)-anchor biosynthesis | 13 | 0.0226  | 0.023232 |

|                                          |    |        |          |
|------------------------------------------|----|--------|----------|
| Vasopressin-regulated water reabsorption | 20 | 0.0228 | 0.023232 |
| Fatty acid metabolism                    | 23 | 0.023  | 0.023232 |
| Cholinergic synapse                      | 45 | 0.0273 | 0.0273   |

**Table S5.** Results of gene-based association analysis on BMI for the target genes of miR-665-3p and miR-29c-3p.

| Gene symbol | Target genes |            | p-value BMI     |
|-------------|--------------|------------|-----------------|
|             | miR-665-3p   | miR-29c-3p |                 |
| EFR3B       | x            |            | <b>1.57E-43</b> |
| RBFOX1      | x            |            | <b>9.40E-32</b> |
| NUP160      |              | x          | <b>3.67E-31</b> |
| NCKAP5L     |              | x          | <b>8.28E-27</b> |
| SPNS1       |              | x          | <b>8.24E-25</b> |
| PTPRD       |              | x          | <b>1.40E-21</b> |
| HMGCR       |              | x          | <b>5.58E-20</b> |
| DLG2        |              | x          | <b>9.62E-20</b> |
| EFNA5       |              | x          | <b>3.81E-17</b> |
| CAMTA1      |              | x          | <b>9.80E-17</b> |
| FAM57B      |              | x          | <b>3.60E-16</b> |
| FOXO3       |              | x          | <b>7.20E-16</b> |
| TRAF3       |              | x          | <b>1.53E-15</b> |
| PRKG1       |              | x          | <b>4.27E-15</b> |
| NAV1        |              | x          | <b>1.55E-14</b> |
| NFAT5       |              | x          | <b>2.35E-14</b> |
| TNRC6B      | x            | x          | <b>3.34E-14</b> |
| ROBO1       | x            | x          | <b>5.47E-14</b> |
| BCL7A       | x            | x          | <b>5.68E-14</b> |
| TRIP12      |              | x          | <b>1.02E-13</b> |
| DNMT3A      | x            | x          | <b>1.10E-13</b> |
| CALCR       |              | x          | <b>1.24E-13</b> |
| KNOP1       | x            |            | <b>1.72E-13</b> |
| HIP1        |              | x          | <b>4.10E-13</b> |
| COL16A1     |              | x          | <b>4.31E-13</b> |
| RARB        | x            | x          | <b>4.71E-13</b> |
| MARK3       |              | x          | <b>5.55E-13</b> |
| PURG        |              | x          | <b>8.72E-13</b> |
| BCL11B      |              | x          | <b>1.52E-12</b> |
| BAIAP2      |              | x          | <b>1.54E-12</b> |
| HIVEP2      | x            |            | <b>2.74E-12</b> |
| N4BP2L2     | x            |            | <b>2.99E-12</b> |
| DCAF7       |              | x          | <b>7.49E-12</b> |
| DIABLO      |              | x          | <b>1.01E-11</b> |
| MCC         | x            |            | <b>1.09E-11</b> |
| PIK3R3      |              | x          | <b>1.56E-11</b> |
| LOXL4       |              | x          | <b>1.58E-11</b> |
| PPARD       |              | x          | <b>1.68E-11</b> |
| LDB2        | x            |            | <b>2.20E-11</b> |
| MLLT11      |              | x          | <b>3.15E-11</b> |
| EXT1        | x            |            | <b>4.49E-11</b> |
| KCNMA1      | x            |            | <b>4.96E-11</b> |
| HBEGF       |              | x          | <b>6.77E-11</b> |
| SMPD3       |              | x          | <b>6.93E-11</b> |
| FIGN        |              | x          | <b>7.45E-11</b> |

|          |   |   |                 |
|----------|---|---|-----------------|
| GALNTL1  | x |   | <b>7.88E-11</b> |
| CBX5     |   | x | <b>8.47E-11</b> |
| AKT3     | x | x | <b>9.02E-11</b> |
| NCAM1    | x |   | <b>9.37E-11</b> |
| TSPAN4   |   | x | <b>1.01E-10</b> |
| LUZP1    | x | x | <b>1.76E-10</b> |
| SMG6     | x |   | <b>1.92E-10</b> |
| BAK1     |   | x | <b>2.01E-10</b> |
| URM1     |   | x | <b>2.03E-10</b> |
| PPP1CB   |   | x | <b>3.16E-10</b> |
| BAT2L2   |   | x | <b>4.26E-10</b> |
| PHF13    | x |   | <b>4.51E-10</b> |
| FNDC5    | x |   | <b>4.96E-10</b> |
| MFAP3    |   | x | <b>5.17E-10</b> |
| CHD3     | x |   | <b>5.96E-10</b> |
| UBTF     |   | x | <b>6.19E-10</b> |
| DAB1     |   | x | <b>6.55E-10</b> |
| DAG1     |   | x | <b>8.15E-10</b> |
| N4BP2L1  |   | x | <b>8.95E-10</b> |
| MGA      | x | x | <b>9.02E-10</b> |
| FREM1    |   | x | <b>9.36E-10</b> |
| DOCK3    | x |   | <b>2.13E-09</b> |
| ERP44    |   | x | <b>2.26E-09</b> |
| SLC25A22 |   | x | <b>2.30E-09</b> |
| SMARCC1  |   | x | <b>2.47E-09</b> |
| POFUT1   | x |   | <b>3.03E-09</b> |
| KCTD15   |   | x | <b>3.10E-09</b> |
| ANK3     |   | x | <b>3.23E-09</b> |
| MYBPHL   | x |   | <b>4.12E-09</b> |
| ZDHHC21  |   | x | <b>4.83E-09</b> |
| BCS1L    | x |   | <b>5.44E-09</b> |
| MFAP2    |   | x | <b>5.55E-09</b> |
| TMOD3    |   | x | <b>5.63E-09</b> |
| HAS3     |   | x | <b>5.95E-09</b> |
| DCAF12   |   | x | <b>6.86E-09</b> |
| DCUN1D4  |   | x | <b>6.98E-09</b> |
| NASP     |   | x | <b>7.31E-09</b> |
| HNF4G    |   | x | <b>1.14E-08</b> |
| EDNRB    |   | x | <b>1.21E-08</b> |
| ABCE1    |   | x | <b>1.69E-08</b> |
| NRAS     |   | x | <b>1.78E-08</b> |
| DAB2IP   |   | x | <b>1.85E-08</b> |
| VCL      |   | x | <b>1.93E-08</b> |
| HOXB6    | x |   | <b>2.09E-08</b> |
| KDM3B    | x |   | <b>3.16E-08</b> |
| ARFGEF2  |   | x | <b>3.45E-08</b> |
| PPP1R13B |   | x | <b>3.60E-08</b> |
| PLAGL2   | x | x | <b>3.81E-08</b> |
| POU2F2   | x | x | <b>3.93E-08</b> |
| TANC1    |   | x | <b>4.89E-08</b> |

|          |   |   |                 |
|----------|---|---|-----------------|
| DNASE2   | x |   | <b>5.03E-08</b> |
| KIAA0408 | x |   | <b>5.09E-08</b> |
| SP1      |   | x | <b>5.42E-08</b> |
| DACH1    | x |   | <b>9.53E-08</b> |
| DGKH     |   | x | <b>1.01E-07</b> |
| MICALL1  | x |   | <b>1.11E-07</b> |
| ABCB6    |   | x | <b>1.12E-07</b> |
| STK35    |   | x | <b>1.13E-07</b> |
| SUFU     | x |   | <b>1.28E-07</b> |
| NCAN     | x |   | <b>1.37E-07</b> |
| CRACR2B  | x |   | <b>1.90E-07</b> |
| CHFR     |   | x | <b>2.05E-07</b> |
| CYB561D1 |   | x | <b>2.06E-07</b> |
| FRMD5    |   | x | <b>2.17E-07</b> |
| SPRY4    |   | x | <b>2.78E-07</b> |
| ARVCF    | x | x | <b>2.91E-07</b> |
| JAZF1    |   | x | <b>2.93E-07</b> |
| KLHL24   | x |   | <b>3.49E-07</b> |
| AHR      |   | x | <b>3.63E-07</b> |
| BYSL     | x |   | <b>3.73E-07</b> |
| CCNT2    | x | x | <b>3.83E-07</b> |
| SYPL2    |   | x | <b>3.89E-07</b> |
| SYNCRIP  |   | x | <b>4.02E-07</b> |
| MMP24    | x | x | <b>4.13E-07</b> |
| UNK      |   | x | <b>4.43E-07</b> |
| OTUD4    |   | x | <b>4.46E-07</b> |
| TNRC18   |   | x | <b>4.97E-07</b> |
| ARHGAP19 | x |   | <b>5.15E-07</b> |
| CACNB3   | x |   | <b>5.53E-07</b> |
| ATG9A    |   | x | <b>6.23E-07</b> |
| TMEM263  | x |   | <b>6.87E-07</b> |
| GSK3B    |   | x | <b>7.03E-07</b> |
| CISD2    |   | x | <b>1.02E-06</b> |
| ZBTB7B   | x |   | <b>1.26E-06</b> |
| CELF2    |   | x | <b>1.33E-06</b> |
| CPS1     |   | x | <b>1.35E-06</b> |
| ISL1     |   | x | <b>1.38E-06</b> |
| L3MBTL4  |   | x | <b>1.43E-06</b> |
| NUCKS1   | x |   | <b>1.61E-06</b> |
| MAP4K4   |   | x | <b>1.66E-06</b> |
| KDM5B    |   | x | <b>2.52E-06</b> |
| CCDC62   | x |   | 3.08E-06        |
| ABI2     | x |   | 3.38E-06        |
| FERMT2   |   | x | 3.60E-06        |
| PPIP5K2  |   | x | 3.64E-06        |
| TMC5     |   | x | 5.00E-06        |
| GNAO1    | x |   | 5.17E-06        |
| COL4A4   |   | x | 5.85E-06        |
| ADAMTS6  |   | x | 5.94E-06        |
| MRTFB    | x |   | 6.08E-06        |

|          |   |   |          |
|----------|---|---|----------|
| FAM134C  |   | x | 6.60E-06 |
| TIAM1    |   | x | 6.79E-06 |
| SUPT7L   | x |   | 7.51E-06 |
| SRC      |   | x | 7.63E-06 |
| ZBTB43   |   | x | 7.82E-06 |
| AAK1     | x |   | 8.04E-06 |
| SETD5    |   | x | 8.43E-06 |
| SFXN2    | x |   | 8.85E-06 |
| ANKRD13B |   | x | 9.16E-06 |
| TM9SF4   | x |   | 1.00E-05 |
| RND1     |   | x | 1.06E-05 |
| SMARCD2  | x |   | 1.09E-05 |
| QK       |   | x | 1.17E-05 |
| KLF12    |   | x | 1.19E-05 |
| TSPAN9   |   | x | 1.19E-05 |
| LPP      | x |   | 1.20E-05 |
| JARID2   |   | x | 1.35E-05 |
| PDHX     |   | x | 1.35E-05 |
| MYST3    | x |   | 1.46E-05 |
| RFXANK   | x |   | 1.47E-05 |
| ZBTB34   | x | x | 1.56E-05 |
| COL1A2   |   | x | 1.91E-05 |
| PTPN2    | x |   | 1.92E-05 |
| VEGFA    |   | x | 1.95E-05 |
| NEBL     |   | x | 2.12E-05 |
| CPEB3    | x | x | 2.16E-05 |
| ARHGAP28 | x | x | 2.20E-05 |
| RAB15    |   | x | 2.28E-05 |
| SGK1     |   | x | 2.28E-05 |
| MEST     |   | x | 2.44E-05 |
| SLC31A1  |   | x | 2.48E-05 |
| SUZ12    | x |   | 2.53E-05 |
| DPYSL5   | x | x | 2.57E-05 |
| RAPGEFL1 |   | x | 2.58E-05 |
| EML6     |   | x | 2.75E-05 |
| DNM3     |   | x | 2.78E-05 |
| BCL2L2   |   | x | 2.81E-05 |
| NFIA     |   | x | 2.99E-05 |
| COPS7B   | x |   | 3.64E-05 |
| PNPLA3   | x |   | 4.02E-05 |
| PRPF3    |   | x | 4.03E-05 |
| TAPBP    | x |   | 4.10E-05 |
| RFX7     |   | x | 4.16E-05 |
| STAU1    |   | x | 4.37E-05 |
| FRMD4A   |   | x | 4.43E-05 |
| XKR4     |   | x | 4.49E-05 |
| ECM2     | x |   | 4.77E-05 |
| HDAC4    |   | x | 5.12E-05 |
| SLC6A20  | x |   | 5.53E-05 |
| RYBP     |   | x | 5.62E-05 |

|         |   |   |          |
|---------|---|---|----------|
| BLMH    |   | x | 6.05E-05 |
| TRAF4   | x | x | 6.50E-05 |
| RRAGD   | x |   | 6.70E-05 |
| SCHIP1  |   | x | 6.86E-05 |
| ZFP26   |   | x | 7.69E-05 |
| MIER3   |   | x | 9.01E-05 |
| BMF     |   | x | 9.80E-05 |
| PTPN11  |   | x | 9.94E-05 |
| ANKRD49 |   | x | 1.01E-04 |
| TRIM37  |   | x | 1.04E-04 |
| ZBTB6   | x |   | 1.06E-04 |
| DECR2   | x |   | 1.08E-04 |
| TBL1XR1 | x |   | 1.09E-04 |
| PSD2    | x |   | 1.11E-04 |
| ETV4    |   | x | 1.13E-04 |
| MTMR4   | x | x | 1.18E-04 |
| VASH2   |   | x | 1.39E-04 |
| POU4F1  |   | x | 1.40E-04 |
| ESRRG   | x |   | 1.41E-04 |
| TNFAIP1 |   | x | 1.42E-04 |
| RHOBTB1 |   | x | 1.45E-04 |
| NDRG4   |   | x | 1.55E-04 |
| ZNF3    | x |   | 1.56E-04 |
| KDM6B   |   | x | 1.58E-04 |
| BICD1   |   | x | 1.66E-04 |
| DUSP2   |   | x | 1.80E-04 |
| WDR82   | x |   | 1.90E-04 |
| LPL     |   | x | 1.92E-04 |
| IL1RAP  |   | x | 1.96E-04 |
| SETDB1  |   | x | 2.02E-04 |
| SLC2A4  | x |   | 2.03E-04 |
| FAM118A | x |   | 2.03E-04 |
| SOX12   |   | x | 2.12E-04 |
| NLK     | x |   | 2.24E-04 |
| RPP14   | x |   | 2.29E-04 |
| PMAIP1  | x |   | 2.29E-04 |
| CMPK1   |   | x | 2.39E-04 |
| PCDHA1  |   | x | 2.66E-04 |
| NANP    |   | x | 2.92E-04 |
| LCORL   |   | x | 3.04E-04 |
| MAPKBP1 |   | x | 3.44E-04 |
| STRN3   |   | x | 3.79E-04 |
| SLC38A2 |   | x | 3.82E-04 |
| SEMA3E  | x |   | 3.88E-04 |
| TIMMDC1 | x |   | 4.16E-04 |
| NCL     | x |   | 4.28E-04 |
| PPM1E   |   | x | 4.46E-04 |
| SCAMP5  | x | x | 4.53E-04 |
| REV3L   |   | x | 4.55E-04 |
| GRIN2B  | x |   | 4.76E-04 |



|         |   |   |          |
|---------|---|---|----------|
| IFI30   |   | x | 4.96E-04 |
| CERCAM  | x |   | 5.02E-04 |
| SERF2   | x |   | 5.03E-04 |
| CRAMP1  | x |   | 5.08E-04 |
| BACH2   |   | x | 5.09E-04 |
| PCDHA2  |   | x | 5.15E-04 |
| RND3    |   | x | 5.33E-04 |
| CAMK1D  |   | x | 5.50E-04 |
| SUMO1   | x |   | 5.69E-04 |
| SNX24   |   | x | 5.72E-04 |
| EML5    |   | x | 5.73E-04 |
| FBXO42  |   | x | 5.73E-04 |
| DPP4    |   | x | 5.99E-04 |
| SYT9    |   | x | 6.03E-04 |
| MAGI1   | x |   | 6.18E-04 |
| ARNT    |   | x | 6.18E-04 |
| LIMCH1  | x |   | 6.29E-04 |
| KLHL41  | x |   | 6.35E-04 |
| PCDHA3  |   | x | 6.36E-04 |
| CCDC127 | x |   | 7.56E-04 |
| F11R    |   | x | 7.59E-04 |
| DIO2    |   | x | 7.77E-04 |
| DPP3    |   | x | 7.82E-04 |
| SIRT1   |   | x | 7.90E-04 |
| RET     |   | x | 8.12E-04 |
| LACTB2  |   | x | 8.28E-04 |
| NCKAP5  |   | x | 8.42E-04 |
| SNX4    |   | x | 8.56E-04 |
| SMCO1   | x |   | 8.59E-04 |
| PIK3R1  |   | x | 9.39E-04 |
| DAAM1   |   | x | 9.41E-04 |
| CD34    | x |   | 9.61E-04 |
| KCTD5   |   | x | 9.77E-04 |
| PTP4A1  |   | x | 9.88E-04 |
| TEX9    | x |   | 9.91E-04 |
| TBX21   |   | x | 1.07E-03 |
| RLF     |   | x | 1.08E-03 |
| IFNAR1  | x |   | 1.08E-03 |
| STRBP   | x |   | 1.11E-03 |
| TLL1    |   | x | 1.13E-03 |
| TCF4    |   | x | 1.17E-03 |
| ADAM12  |   | x | 1.18E-03 |
| TRIB2   |   | x | 1.21E-03 |
| PKNOX2  |   | x | 1.21E-03 |
| PPP1R9A | x |   | 1.22E-03 |
| PRELP   |   | x | 1.27E-03 |
| EPS15   |   | x | 1.46E-03 |
| DENND1B |   | x | 1.49E-03 |
| CANX    |   | x | 1.56E-03 |
| SH3BP5L |   | x | 1.59E-03 |

|          |   |   |          |
|----------|---|---|----------|
| MRPL11   | x |   | 1.60E-03 |
| PCDHA4   |   | x | 1.65E-03 |
| CHSY1    |   | x | 1.80E-03 |
| ANKRD34A | x |   | 1.80E-03 |
| BSDC1    |   | x | 2.00E-03 |
| EML4     |   | x | 2.03E-03 |
| COL4A2   |   | x | 2.04E-03 |
| GFOD1    |   | x | 2.09E-03 |
| ELF2     |   | x | 2.16E-03 |
| CAPN7    |   | x | 2.19E-03 |
| CYB5D2   | x |   | 2.25E-03 |
| CEP97    | x |   | 2.27E-03 |
| CAMK2G   |   | x | 2.38E-03 |
| STX17    | x | x | 2.41E-03 |
| SLC22A5  |   | x | 2.42E-03 |
| SEPT3    | x |   | 2.44E-03 |
| XPO7     | x |   | 2.57E-03 |
| NFIC     |   | x | 2.63E-03 |
| BIRC6    |   | x | 2.65E-03 |
| CSPG4    |   | x | 2.74E-03 |
| CAPN5    | x |   | 2.79E-03 |
| GTF2A1   | x |   | 2.96E-03 |
| MAPK14   | x |   | 2.99E-03 |
| PFAS     | x |   | 3.04E-03 |
| MBTD1    |   | x | 3.04E-03 |
| IDE      |   | x | 3.05E-03 |
| GMEB1    | x |   | 3.05E-03 |
| COL7A1   |   | x | 3.13E-03 |
| TOX4     | x |   | 3.16E-03 |
| ADAMTS17 |   | x | 3.17E-03 |
| SAP18    | x |   | 3.18E-03 |
| NRSN1    |   | x | 3.33E-03 |
| AZI2     | x |   | 3.41E-03 |
| PEX13    | x |   | 3.47E-03 |
| MROH1    | x |   | 3.61E-03 |
| ZCCHC17  | x |   | 3.83E-03 |
| PPIC     |   | x | 3.85E-03 |
| LIN7A    |   | x | 3.87E-03 |
| LSM11    |   | x | 3.89E-03 |
| APLP2    | x |   | 3.91E-03 |
| HPCAL4   |   | x | 4.19E-03 |
| DYNLL1   | x |   | 4.27E-03 |
| PCDHA5   |   | x | 4.33E-03 |
| ATXN7L3  | x |   | 4.50E-03 |
| ITGB1    |   | x | 4.56E-03 |
| ITGA11   |   | x | 4.66E-03 |
| NSD1     |   | x | 4.81E-03 |
| TMEM127  |   | x | 5.02E-03 |
| PCDHAC2  |   | x | 5.14E-03 |
| FRAS1    |   | x | 5.37E-03 |

|          |   |   |          |
|----------|---|---|----------|
| SCAP     |   | x | 5.43E-03 |
| CAV2     |   | x | 5.45E-03 |
| METAP2   |   | x | 5.64E-03 |
| STON2    | x |   | 5.85E-03 |
| RAB30    |   | x | 5.87E-03 |
| TECTB    |   | x | 6.02E-03 |
| PSMD11   | x |   | 6.41E-03 |
| NCOA4    |   | x | 6.43E-03 |
| AMFR     |   | x | 6.75E-03 |
| MAT1A    |   | x | 6.83E-03 |
| CDKL2    |   | x | 7.00E-03 |
| PCLAF    | x |   | 7.10E-03 |
| GTPBP3   | x |   | 7.27E-03 |
| EMC1     | x |   | 7.32E-03 |
| KIF26A   |   | x | 7.39E-03 |
| COL4A3   |   | x | 7.53E-03 |
| SPEN     |   | x | 7.56E-03 |
| FNDC3B   | x |   | 7.58E-03 |
| PXDN     |   | x | 7.63E-03 |
| GPR85    |   | x | 7.66E-03 |
| TMEM151B |   | x | 7.72E-03 |
| PCDHA6   |   | x | 7.78E-03 |
| LDLRAD3  |   | x | 7.86E-03 |
| CPNE8    |   | x | 7.90E-03 |
| AP1G1    | x | x | 8.07E-03 |
| THOC1    |   | x | 8.46E-03 |
| KCNK6    | x |   | 8.54E-03 |
| HEPACAM  |   | x | 8.58E-03 |
| ZNF420   | x |   | 8.59E-03 |
| PITPNM3  |   | x | 8.83E-03 |
| MAPRE2   | x | x | 8.89E-03 |
| SPRY1    |   | x | 9.20E-03 |
| RAP1GDS1 |   | x | 9.39E-03 |
| SKI      |   | x | 9.51E-03 |
| MLST8    | x |   | 9.52E-03 |
| ATAD2B   | x | x | 9.61E-03 |
| PAXIP1   | x |   | 9.67E-03 |
| HIF3A    |   | x | 9.83E-03 |
| MORF4L1  |   | x | 9.94E-03 |
| GPX7     |   | x | 1.00E-02 |
| COL15A1  |   | x | 1.07E-02 |
| MLF1     |   | x | 1.09E-02 |
| TRIM44   | x |   | 1.09E-02 |
| PLEKHF2  |   | x | 1.09E-02 |
| BLOC1S3  | x |   | 1.10E-02 |
| KCNC2    |   | x | 1.11E-02 |
| COL2A1   |   | x | 1.12E-02 |
| ZFYVE26  |   | x | 1.15E-02 |
| CDKN1A   |   | x | 1.16E-02 |
| PCDHAC1  |   | x | 1.18E-02 |

|         |   |   |          |
|---------|---|---|----------|
| SEMA4G  | x |   | 1.21E-02 |
| PRDX1   | x |   | 1.22E-02 |
| MTAP6   |   | x | 1.23E-02 |
| CNOT6   |   | x | 1.32E-02 |
| PLEKHA1 |   | x | 1.35E-02 |
| RAB14   |   | x | 1.37E-02 |
| PLXNA2  | x |   | 1.37E-02 |
| NRF1    | x |   | 1.38E-02 |
| KIF26B  |   | x | 1.42E-02 |
| KCNIP2  |   | x | 1.44E-02 |
| FRMD4B  | x |   | 1.52E-02 |
| AGPS    | x |   | 1.62E-02 |
| VEZF1   | x |   | 1.65E-02 |
| SLMAP   |   | x | 1.65E-02 |
| GNG12   |   | x | 1.67E-02 |
| STX1A   |   | x | 1.69E-02 |
| PLEKHH1 | x |   | 1.70E-02 |
| AKAP5   | x |   | 1.70E-02 |
| DPYSL2  |   | x | 1.71E-02 |
| IBSP    |   | x | 1.72E-02 |
| FADD    | x |   | 1.75E-02 |
| PIN1    | x |   | 1.78E-02 |
| MAT2A   |   | x | 1.83E-02 |
| GPR37   |   | x | 1.84E-02 |
| LEMD3   |   | x | 1.85E-02 |
| MBLAC2  |   | x | 1.87E-02 |
| SHPRH   |   | x | 1.87E-02 |
| SENP5   | x |   | 1.88E-02 |
| CD276   |   | x | 1.92E-02 |
| COL27A1 |   | x | 1.93E-02 |
| NKTR    |   | x | 1.94E-02 |
| KL      | x |   | 1.94E-02 |
| SERINC5 |   | x | 1.98E-02 |
| CTSA    | x |   | 2.01E-02 |
| MRPL35  | x | x | 2.02E-02 |
| STRN4   |   | x | 2.06E-02 |
| PCDHA8  |   | x | 2.11E-02 |
| PCDHA11 |   | x | 2.11E-02 |
| ZBTB8A  | x |   | 2.12E-02 |
| PCDHA7  |   | x | 2.13E-02 |
| SLC6A2  | x | x | 2.15E-02 |
| PAX9    | x |   | 2.15E-02 |
| SIDT1   |   | x | 2.23E-02 |
| PCDHA10 |   | x | 2.32E-02 |
| ZDHHC5  |   | x | 2.36E-02 |
| PRR5L   |   | x | 2.41E-02 |
| DTX4    |   | x | 2.42E-02 |
| GIT2    | x |   | 2.45E-02 |
| NRCAM   | x |   | 2.45E-02 |
| YWHAE   |   | x | 2.47E-02 |

|          |   |   |          |
|----------|---|---|----------|
| ZCCHC2   | x |   | 2.49E-02 |
| ABHD4    | x | x | 2.49E-02 |
| CSNK1G1  |   | x | 2.49E-02 |
| DTNA     | x |   | 2.52E-02 |
| VAMP3    | x | x | 2.52E-02 |
| ZBTB5    |   | x | 2.53E-02 |
| SLC4A4   | x |   | 2.57E-02 |
| ARF4     | x |   | 2.60E-02 |
| VASH1    |   | x | 2.61E-02 |
| MRPL17   | x |   | 2.67E-02 |
| ADAMTS18 |   | x | 2.73E-02 |
| LMX1A    |   | x | 2.89E-02 |
| SNX22    |   | x | 2.90E-02 |
| TGFB3    |   | x | 2.90E-02 |
| ZFP346   |   | x | 2.93E-02 |
| SEMA4B   | x |   | 2.96E-02 |
| SLC25A44 |   | x | 2.99E-02 |
| YY1      |   | x | 3.08E-02 |
| LYSMD1   |   | x | 3.11E-02 |
| ATAD5    |   | x | 3.18E-02 |
| ROD1     |   | x | 3.19E-02 |
| SUDS3    | x |   | 3.22E-02 |
| RAC2     | x |   | 3.30E-02 |
| ZDHHC3   | x |   | 3.35E-02 |
| SLC15A1  | x |   | 3.38E-02 |
| SRCIN1   | x |   | 3.39E-02 |
| ENPP2    |   | x | 3.40E-02 |
| OSTF1    | x |   | 3.45E-02 |
| GDAP1L1  | x |   | 3.46E-02 |
| MARK2    | x |   | 3.48E-02 |
| NCOR2    |   | x | 3.49E-02 |
| PCGF3    |   | x | 3.51E-02 |
| TCFEC    |   | x | 3.54E-02 |
| CTNND1   |   | x | 3.58E-02 |
| EPC1     |   | x | 3.62E-02 |
| GMFB     | x | x | 3.63E-02 |
| MEGF6    |   | x | 3.67E-02 |
| ATP2B4   |   | x | 3.79E-02 |
| USP45    | x |   | 3.86E-02 |
| CDNF     | x |   | 3.90E-02 |
| NUFIP2   |   | x | 3.98E-02 |
| HNRNPAB  | x |   | 4.04E-02 |
| EPM2AIP1 | x |   | 4.07E-02 |
| TRIM36   | x |   | 4.10E-02 |
| GDPGP1   | x |   | 4.20E-02 |
| RAB40C   |   | x | 4.22E-02 |
| SLC20A1  | x |   | 4.23E-02 |
| MCL1     |   | x | 4.30E-02 |
| LARP4B   |   | x | 4.34E-02 |
| GXYLT2   |   | x | 4.35E-02 |

|                       |   |   |          |
|-----------------------|---|---|----------|
| FUBP1                 |   | x | 4.36E-02 |
| DIP2C                 |   | x | 4.37E-02 |
| AFAP1                 | x |   | 4.44E-02 |
| SERPINH1              |   | x | 4.49E-02 |
| CTDSPL2               |   | x | 4.50E-02 |
| RRP1B                 | x |   | 4.53E-02 |
| ITSN1                 | x |   | 4.60E-02 |
| TNFAIP6               | x |   | 4.61E-02 |
| TBC1D13               |   | x | 4.69E-02 |
| DAAM2                 |   | x | 4.76E-02 |
| DARS2                 | x |   | 4.79E-02 |
| DBT                   |   | x | 4.80E-02 |
| TMEM229B              |   | x | 4.81E-02 |
| PAN2                  |   | x | 4.84E-02 |
| CREB5                 |   | x | 4.89E-02 |
| <a href="#">SMAD9</a> | x |   | 4.98E-02 |
| SLC39A9               |   | x | 4.99E-02 |
| TUBB2A                |   | x | 5.00E-02 |
| ERCC2                 | x |   | 5.11E-02 |
| FSTL1                 |   | x | 5.17E-02 |
| PER1                  |   | x | 5.17E-02 |
| GNG2                  | x | x | 5.21E-02 |
| TMEM86A               |   | x | 5.30E-02 |
| NID2                  |   | x | 5.45E-02 |
| AGAP2                 | x |   | 5.48E-02 |
| CDC42BPA              |   | x | 5.50E-02 |
| KIF21B                | x |   | 5.53E-02 |
| RALA                  |   | x | 5.55E-02 |
| ERI2                  | x |   | 5.61E-02 |
| SMEK2                 |   | x | 5.68E-02 |
| IMPDH1                | x | x | 5.73E-02 |
| ANK1                  |   | x | 5.74E-02 |
| IGF1                  |   | x | 5.76E-02 |
| ARC                   | x |   | 5.80E-02 |
| COL11A1               |   | x | 5.81E-02 |
| LIX1                  | x |   | 5.81E-02 |
| CTNNBIP1              |   | x | 5.83E-02 |
| COMMD2                |   | x | 5.91E-02 |
| ZNF317                | x |   | 6.02E-02 |
| ONECUT2               | x | x | 6.07E-02 |
| CNR1                  |   | x | 6.11E-02 |
| POLR3GL               | x |   | 6.11E-02 |
| ADAMTS7               |   | x | 6.19E-02 |
| LEKR1                 | x |   | 6.29E-02 |
| ANKRD13C              | x | x | 6.34E-02 |
| PITPNM2               |   | x | 6.41E-02 |
| DICER1                |   | x | 6.41E-02 |
| PCTP                  | x |   | 6.43E-02 |
| FASL                  |   | x | 6.44E-02 |
| FNBP1L                | x |   | 6.67E-02 |

|         |   |   |          |
|---------|---|---|----------|
| FGF9    | x |   | 6.71E-02 |
| AFF4    |   | x | 6.81E-02 |
| BMPR1A  |   | x | 6.82E-02 |
| PTEN    |   | x | 6.90E-02 |
| HIATL1  |   | x | 6.91E-02 |
| FEM1B   |   | x | 6.95E-02 |
| LIF     |   | x | 6.99E-02 |
| DOT1L   |   | x | 7.01E-02 |
| STEAP4  | x |   | 7.11E-02 |
| SLC16A1 |   | x | 7.19E-02 |
| LMTK2   |   | x | 7.25E-02 |
| FAM126B |   | x | 7.36E-02 |
| STAM    | x |   | 7.42E-02 |
| FAM116A |   | x | 7.44E-02 |
| SGMS2   | x |   | 7.63E-02 |
| EID1    | x |   | 7.70E-02 |
| VPS26B  |   | x | 7.81E-02 |
| WDFY1   |   | x | 7.81E-02 |
| DDHD2   | x |   | 7.92E-02 |
| ELOVL4  |   | x | 7.93E-02 |
| LAMC1   |   | x | 7.93E-02 |
| XPO1    | x |   | 7.97E-02 |
| UBAC1   | x |   | 8.06E-02 |
| SCN8A   | x |   | 8.26E-02 |
| SIX4    | x |   | 8.29E-02 |
| BNIP3L  | x |   | 8.31E-02 |
| BCAM    | x |   | 8.40E-02 |
| BTG2    |   | x | 8.51E-02 |
| FAM184B |   | x | 8.57E-02 |
| BBC3    | x | x | 8.60E-02 |
| ANKRD52 |   | x | 8.70E-02 |
| IFFO2   |   | x | 8.92E-02 |
| ABI1    |   | x | 8.96E-02 |
| GK5     | x |   | 9.06E-02 |
| E2F7    |   | x | 9.17E-02 |
| ATRN    |   | x | 9.19E-02 |
| ZNF385C | x |   | 9.20E-02 |
| FRS2    | x |   | 9.33E-02 |
| NUP214  | x |   | 9.64E-02 |
| TMEM201 | x | x | 9.65E-02 |
| FBXO43  | x |   | 9.74E-02 |
| PIGM    |   | x | 9.75E-02 |
| YTHDF3  |   | x | 1.01E-01 |
| TTN     | x |   | 1.02E-01 |
| FAM19A1 | x |   | 1.02E-01 |
| STMN2   |   | x | 1.03E-01 |
| KDELC1  |   | x | 1.06E-01 |
| IBA57   | x |   | 1.06E-01 |
| PMP22   |   | x | 1.07E-01 |
| IREB2   |   | x | 1.07E-01 |

|          |   |   |          |
|----------|---|---|----------|
| TCFEB    |   | x | 1.09E-01 |
| KIRREL   |   | x | 1.09E-01 |
| RCOR1    |   | x | 1.10E-01 |
| MRPL40   | x |   | 1.12E-01 |
| TOR1AIP2 | x |   | 1.12E-01 |
| HAPLN1   |   | x | 1.15E-01 |
| CBFA2T2  | x |   | 1.15E-01 |
| UBE2N    | x |   | 1.15E-01 |
| HBP1     |   | x | 1.16E-01 |
| LEP      |   | x | 1.17E-01 |
| SPARC    |   | x | 1.21E-01 |
| SRXN1    | x |   | 1.23E-01 |
| PDGFB    |   | x | 1.24E-01 |
| KBTBD8   |   | x | 1.24E-01 |
| CBX2     |   | x | 1.24E-01 |
| IFNG     |   | x | 1.25E-01 |
| TASOR    | x |   | 1.27E-01 |
| G6PC     |   | x | 1.30E-01 |
| OXTR     |   | x | 1.31E-01 |
| PPIH     | x |   | 1.32E-01 |
| ZFP282   |   | x | 1.32E-01 |
| ADAMTS1  | x |   | 1.34E-01 |
| ENTPD7   |   | x | 1.35E-01 |
| ICOS     |   | x | 1.36E-01 |
| SUV420H1 |   | x | 1.37E-01 |
| CRISPLD1 |   | x | 1.38E-01 |
| LIMS1    |   | x | 1.39E-01 |
| PDGFRB   |   | x | 1.39E-01 |
| NDST1    |   | x | 1.40E-01 |
| AK3      |   | x | 1.40E-01 |
| COL5A2   |   | x | 1.40E-01 |
| TGFB2    | x |   | 1.40E-01 |
| PIGT     |   | x | 1.42E-01 |
| CEP68    |   | x | 1.42E-01 |
| ELN      |   | x | 1.43E-01 |
| RNF169   |   | x | 1.44E-01 |
| C1orf109 | x |   | 1.45E-01 |
| ZFP36L1  |   | x | 1.45E-01 |
| COMMD8   | x |   | 1.47E-01 |
| ARHGAP5  |   | x | 1.48E-01 |
| SLC43A2  |   | x | 1.49E-01 |
| ARRDC3   |   | x | 1.49E-01 |
| HECW1    |   | x | 1.53E-01 |
| NAV3     |   | x | 1.54E-01 |
| COL3A1   |   | x | 1.56E-01 |
| ADAM11   | x |   | 1.56E-01 |
| HOXC13   |   | x | 1.58E-01 |
| THSD4    |   | x | 1.61E-01 |
| TTC5     | x |   | 1.61E-01 |
| C2orf80  | x |   | 1.63E-01 |



|           |   |   |          |
|-----------|---|---|----------|
| ADCYAP1R1 |   | x | 1.64E-01 |
| HSPG2     |   | x | 1.64E-01 |
| SS18L1    |   | x | 1.64E-01 |
| HEXA      |   | x | 1.65E-01 |
| ULK1      | x |   | 1.65E-01 |
| SOAT1     | x |   | 1.65E-01 |
| DMWD      | x |   | 1.67E-01 |
| CLMN      |   | x | 1.67E-01 |
| TSPAN14   |   | x | 1.67E-01 |
| TIGD3     | x |   | 1.70E-01 |
| IQCG      | x |   | 1.72E-01 |
| ARPC4     | x |   | 1.73E-01 |
| SLCO5A1   |   | x | 1.74E-01 |
| COL8A1    |   | x | 1.74E-01 |
| ZHX1      |   | x | 1.75E-01 |
| ZFP91     |   | x | 1.75E-01 |
| XBP1      | x |   | 1.76E-01 |
| EDC3      |   | x | 1.78E-01 |
| GAB1      |   | x | 1.79E-01 |
| LRRN4CL   | x |   | 1.80E-01 |
| ZER1      |   | x | 1.80E-01 |
| TDG       |   | x | 1.86E-01 |
| MAB21L1   | x |   | 1.88E-01 |
| BACE1     |   | x | 1.90E-01 |
| TRMT10A   | x |   | 1.91E-01 |
| NKIRAS2   |   | x | 1.92E-01 |
| ISG20L2   | x |   | 1.93E-01 |
| ZBTB40    |   | x | 1.93E-01 |
| HNRNPUL1  |   | x | 1.99E-01 |
| RANBP3L   | x |   | 2.03E-01 |
| SLC39A1   | x |   | 2.04E-01 |
| ZMAT3     | x |   | 2.05E-01 |
| SLC17A7   | x |   | 2.07E-01 |
| POLE3     |   | x | 2.08E-01 |
| SCN3B     |   | x | 2.08E-01 |
| KPNA4     |   | x | 2.09E-01 |
| YPEL2     |   | x | 2.14E-01 |
| GLIS2     |   | x | 2.15E-01 |
| EIF4A2    | x | x | 2.15E-01 |
| CX3CL1    |   | x | 2.15E-01 |
| PHF21A    |   | x | 2.22E-01 |
| CDC42     |   | x | 2.27E-01 |
| PITPNA    |   | x | 2.27E-01 |
| GCC2      |   | x | 2.28E-01 |
| ZFHX2     | x |   | 2.28E-01 |
| ZFP191    |   | x | 2.29E-01 |
| ZNF195    | x |   | 2.35E-01 |
| COL19A1   |   | x | 2.35E-01 |
| RAB6B     |   | x | 2.36E-01 |
| PHLDB3    |   | x | 2.38E-01 |

|             |   |   |          |
|-------------|---|---|----------|
| SENP1       |   | x | 2.39E-01 |
| ZNF830      | x |   | 2.41E-01 |
| HP1BP3      | x |   | 2.42E-01 |
| OSBPL8      | x |   | 2.46E-01 |
| RIC8        |   | x | 2.47E-01 |
| CHRM1       | x |   | 2.47E-01 |
| TNFRSF1A    |   | x | 2.47E-01 |
| TMEM183A    |   | x | 2.49E-01 |
| TRAPPC13    | x |   | 2.50E-01 |
| ARL4A       |   | x | 2.56E-01 |
| PTX3        |   | x | 2.58E-01 |
| SMCR7L      |   | x | 2.59E-01 |
| USP42       |   | x | 2.61E-01 |
| CSGALNACT2  |   | x | 2.66E-01 |
| SUV420H2    |   | x | 2.66E-01 |
| DRD1A       |   | x | 2.67E-01 |
| PLK3        | x |   | 2.70E-01 |
| KDM2A       |   | x | 2.71E-01 |
| EBNA1BP2    | x |   | 2.71E-01 |
| CWC25       | x |   | 2.72E-01 |
| ADAMTS9     |   | x | 2.72E-01 |
| PARG        |   | x | 2.73E-01 |
| NRBP1       |   | x | 2.76E-01 |
| KLHL28      |   | x | 2.77E-01 |
| ING4        |   | x | 2.79E-01 |
| ADAM19      |   | x | 2.79E-01 |
| FMC1-LUC7L2 | x |   | 2.80E-01 |
| R3HDM1      | x |   | 2.83E-01 |
| CCDC117     |   | x | 2.83E-01 |
| NFATC3      |   | x | 2.87E-01 |
| SLC30A10    |   | x | 2.88E-01 |
| RINL        | x |   | 2.90E-01 |
| FBN1        |   | x | 2.92E-01 |
| MAN2A2      | x |   | 2.97E-01 |
| RNF19A      |   | x | 2.98E-01 |
| YTHDF1      |   | x | 3.00E-01 |
| NMRK2       | x |   | 3.04E-01 |
| TSTD2       | x |   | 3.06E-01 |
| XRCC2       | x |   | 3.13E-01 |
| IFNGR2      | x |   | 3.13E-01 |
| HTR7        |   | x | 3.19E-01 |
| SLC27A1     | x |   | 3.19E-01 |
| SOCS7       |   | x | 3.20E-01 |
| SESTD1      | x | x | 3.31E-01 |
| GRIP1       |   | x | 3.31E-01 |
| HCN1        |   | x | 3.38E-01 |
| PRKRA       |   | x | 3.39E-01 |
| ATP6V1A     |   | x | 3.40E-01 |
| SYNPO       | x |   | 3.46E-01 |
| ERP29       |   | x | 3.47E-01 |

|         |   |   |          |
|---------|---|---|----------|
| MYBL2   |   | x | 3.49E-01 |
| FZD5    | x | x | 3.50E-01 |
| DOLPP1  |   | x | 3.50E-01 |
| EMP1    |   | x | 3.52E-01 |
| DDX1    |   | x | 3.52E-01 |
| ELMO2   |   | x | 3.54E-01 |
| PTPRF   | x | x | 3.55E-01 |
| TRIM63  |   | x | 3.56E-01 |
| CDK6    |   | x | 3.61E-01 |
| SLC7A1  |   | x | 3.63E-01 |
| RICTOR  |   | x | 3.63E-01 |
| RNF165  |   | x | 3.68E-01 |
| CCND2   |   | x | 3.69E-01 |
| ERCC6   | x | x | 3.70E-01 |
| NOSIP   | x |   | 3.72E-01 |
| PALM    |   | x | 3.74E-01 |
| POGLUT3 | x |   | 3.79E-01 |
| ARPP19  |   | x | 3.80E-01 |
| KDM4A   |   | x | 3.81E-01 |
| KLF4    |   | x | 3.87E-01 |
| CCDC88A |   | x | 3.87E-01 |
| XKR7    |   | x | 3.89E-01 |
| FBN2    |   | x | 3.96E-01 |
| TXNL1   | x |   | 3.96E-01 |
| SFPQ    |   | x | 3.96E-01 |
| SRF     | x |   | 3.99E-01 |
| ZHX3    |   | x | 4.03E-01 |
| PALM2   |   | x | 4.03E-01 |
| KDR     | x |   | 4.03E-01 |
| AQP7    | x |   | 4.07E-01 |
| TMX4    | x |   | 4.09E-01 |
| OXR1    |   | x | 4.10E-01 |
| SLC35E1 | x |   | 4.12E-01 |
| MTF1    | x |   | 4.12E-01 |
| CCDC80  |   | x | 4.17E-01 |
| ATP1B1  |   | x | 4.17E-01 |
| TUBE1   | x |   | 4.23E-01 |
| PPP2CA  |   | x | 4.26E-01 |
| ATXN1L  | x |   | 4.38E-01 |
| THAP2   | x |   | 4.41E-01 |
| FBXL20  |   | x | 4.47E-01 |
| DNMT3B  |   | x | 4.47E-01 |
| SC5D    | x |   | 4.52E-01 |
| ING3    | x |   | 4.53E-01 |
| SLC8B1  | x |   | 4.54E-01 |
| PPP2R2A | x |   | 4.61E-01 |
| GAA     | x |   | 4.64E-01 |
| TRAFD1  |   | x | 4.64E-01 |
| SLC23A2 | x |   | 4.70E-01 |
| SLC9A1  | x |   | 4.71E-01 |

|          |   |   |          |
|----------|---|---|----------|
| FAM131B  |   | x | 4.73E-01 |
| RAD1     | x |   | 4.76E-01 |
| CALM3    |   | x | 4.78E-01 |
| TCFAP2C  |   | x | 4.81E-01 |
| SRCRB4D  |   | x | 4.83E-01 |
| CALU     |   | x | 4.84E-01 |
| ACER1    | x |   | 4.85E-01 |
| RNF214   |   | x | 4.92E-01 |
| DISP3    | x |   | 4.98E-01 |
| AKAP8    | x |   | 5.00E-01 |
| MAP3K7   | x |   | 5.01E-01 |
| INPP5E   | x |   | 5.02E-01 |
| RBFOX2   |   | x | 5.03E-01 |
| KCTD20   |   | x | 5.07E-01 |
| HDGF     |   | x | 5.10E-01 |
| PRX      | x |   | 5.18E-01 |
| LDLRAP1  |   | x | 5.18E-01 |
| LTBR     |   | x | 5.21E-01 |
| TMEM65   |   | x | 5.24E-01 |
| CACNA1G  | x |   | 5.29E-01 |
| GTPBP2   |   | x | 5.30E-01 |
| ZNF354A  | x |   | 5.35E-01 |
| ING2     | x | x | 5.37E-01 |
| LATS1    | x |   | 5.39E-01 |
| PDIK1L   |   | x | 5.39E-01 |
| RSAD1    |   | x | 5.45E-01 |
| COL5A1   |   | x | 5.45E-01 |
| COL22A1  |   | x | 5.48E-01 |
| PDGFC    |   | x | 5.49E-01 |
| PDGFRA   |   | x | 5.51E-01 |
| BAHD1    |   | x | 5.52E-01 |
| INSRR    |   | x | 5.54E-01 |
| KCNC3    |   | x | 5.56E-01 |
| TMEM132A |   | x | 5.57E-01 |
| COL9A1   |   | x | 5.57E-01 |
| UBFD1    |   | x | 5.57E-01 |
| PVRL1    |   | x | 5.62E-01 |
| KCTD21   |   | x | 5.70E-01 |
| TAF5L    | x |   | 5.72E-01 |
| ACTR3    | x |   | 5.75E-01 |
| TMEM48   |   | x | 5.77E-01 |
| AP4E1    |   | x | 5.79E-01 |
| DHX37    | x |   | 5.80E-01 |
| TMEM135  |   | x | 5.81E-01 |
| PITPNB   |   | x | 5.91E-01 |
| RBAK     | x |   | 5.95E-01 |
| PDXK     | x |   | 5.97E-01 |
| MYCN     |   | x | 6.04E-01 |
| NFATC4   |   | x | 6.12E-01 |
| CHIC2    |   | x | 6.12E-01 |

|          |   |   |          |
|----------|---|---|----------|
| SLC30A3  |   | x | 6.14E-01 |
| ACTL6A   | x |   | 6.16E-01 |
| TET2     |   | x | 6.18E-01 |
| TPM1     |   | x | 6.20E-01 |
| SH3GLB1  |   | x | 6.26E-01 |
| RHOG     | x |   | 6.28E-01 |
| PAIP2    |   | x | 6.30E-01 |
| MLEC     | x |   | 6.32E-01 |
| ZNF558   | x |   | 6.32E-01 |
| AJUBA    | x |   | 6.33E-01 |
| MMP2     |   | x | 6.34E-01 |
| H4C9     | x |   | 6.40E-01 |
| COL4A1   |   | x | 6.41E-01 |
| UBTD2    |   | x | 6.41E-01 |
| TFCP2    | x |   | 6.44E-01 |
| NRGN     | x |   | 6.45E-01 |
| MZT1     | x |   | 6.48E-01 |
| PRPF40A  |   | x | 6.49E-01 |
| COL24A1  |   | x | 6.50E-01 |
| TCEB1    | x |   | 6.51E-01 |
| GATA5    | x |   | 6.56E-01 |
| IRGM     | x |   | 6.57E-01 |
| MAP2K4   |   | x | 6.60E-01 |
| TAF5     |   | x | 6.61E-01 |
| MED26    |   | x | 6.61E-01 |
| NOP9     | x |   | 6.64E-01 |
| UNC13B   |   | x | 6.74E-01 |
| NKIRAS1  | x |   | 6.75E-01 |
| ADAMTS16 |   | x | 6.78E-01 |
| TTC14    |   | x | 6.84E-01 |
| ZNF444   | x |   | 6.84E-01 |
| HMCN1    |   | x | 6.86E-01 |
| PKDCC    | x |   | 6.88E-01 |
| SNX13    | x |   | 6.90E-01 |
| VPS25    |   | x | 6.92E-01 |
| TTC26    | x |   | 6.93E-01 |
| GCNT3    | x |   | 6.97E-01 |
| MAPK10   |   | x | 7.06E-01 |
| HMGN3    |   | x | 7.06E-01 |
| FAM136A  |   | x | 7.21E-01 |
| OSBP     |   | x | 7.23E-01 |
| RNF138   |   | x | 7.24E-01 |
| INA      |   | x | 7.24E-01 |
| PLIN3    | x |   | 7.27E-01 |
| JOSD1    |   | x | 7.27E-01 |
| COL6A3   |   | x | 7.29E-01 |
| ARRDC4   |   | x | 7.40E-01 |
| COL5A3   |   | x | 7.46E-01 |
| INSIG1   |   | x | 7.48E-01 |
| DUSP22   |   | x | 7.53E-01 |

|               |   |   |          |
|---------------|---|---|----------|
| TGFBR1        | x |   | 7.53E-01 |
| ATAD2         | x |   | 7.55E-01 |
| KCMF1         | x |   | 7.58E-01 |
| PLEKHH2       | x |   | 7.62E-01 |
| CFL2          |   | x | 7.70E-01 |
| IFFO1         |   | x | 7.73E-01 |
| SMTNL2        | x | x | 7.82E-01 |
| ZNF845        | x |   | 7.90E-01 |
| ACAP3         |   | x | 8.09E-01 |
| GCSH          |   | x | 8.15E-01 |
| FAM76B        |   | x | 8.31E-01 |
| CLDN1         |   | x | 8.34E-01 |
| ISLR2         |   | x | 8.40E-01 |
| HAS2          |   | x | 8.51E-01 |
| CDC7          |   | x | 8.57E-01 |
| DGKD          |   | x | 8.63E-01 |
| SLC25A36      |   | x | 8.67E-01 |
| BPNT1         | x |   | 8.70E-01 |
| UBE2K         |   | x | 8.75E-01 |
| HTR5A         | x |   | 8.81E-01 |
| GCAP14        |   | x | 8.90E-01 |
| SCO1          | x |   | 8.92E-01 |
| LRRC58        | x |   | 8.93E-01 |
| DUSP3         | x |   | 8.93E-01 |
| GPCPD1        | x | x | 8.98E-01 |
| RRP36         | x |   | 8.98E-01 |
| MARCHF2       | x |   | 9.01E-01 |
| KLHDC3        |   | x | 9.01E-01 |
| EPHB3         |   | x | 9.34E-01 |
| LASP1         | x |   | 9.36E-01 |
| ACOT11        | x |   | 9.51E-01 |
| RMI2          | x |   | 9.53E-01 |
| GJD2          |   | x | 9.56E-01 |
| 1110018G07RIK | x |   | #N/D     |
| 2310046O06RIK |   | x | #N/D     |
| 2400001E08RIK |   | x | #N/D     |
| 2410066E13RIK | x |   | #N/D     |
| 2810046L04RIK |   | x | #N/D     |
| 3110035E14RIK | x |   | #N/D     |
| 4833424O15RIK |   | x | #N/D     |
| 4921524J17RIK |   | x | #N/D     |
| 4921536K21Rik |   | x | #N/D     |
| 4931406P16RIK |   | x | #N/D     |
| 4931428F04RIK |   | x | #N/D     |
| 4933439F18RIK |   | x | #N/D     |
| 5133401N09RIK | x |   | #N/D     |
| 6720456H20RIK |   | x | #N/D     |
| 8030411F24RIK |   | x | #N/D     |
| 8430427H17RIK |   | x | #N/D     |
| 9130011E15RIK | x |   | #N/D     |

|               |   |   |      |
|---------------|---|---|------|
| 9530068E07RIK |   | x | #N/D |
| AC008397.2    | x |   | #N/D |
| AC093525.2    | x |   | #N/D |
| AGTR2         |   | x | #N/D |
| AMOT          | x | x | #N/D |
| AP002748.5    | x |   | #N/D |
| ARF2          |   | x | #N/D |
| ARHGAP36      |   | x | #N/D |
| ASB11         |   | x | #N/D |
| ATP1B4        |   | x | #N/D |
| ATRX          | x | x | #N/D |
| AU019823      |   | x | #N/D |
| B230219D22RIK |   | x | #N/D |
| BC023814      | x |   | #N/D |
| BC035295      |   | x | #N/D |
| BC060632      |   | x | #N/D |
| BC065085      |   | x | #N/D |
| BRWD3         |   | x | #N/D |
| C030046E11RIK |   | x | #N/D |
| C030046I01RIK |   | x | #N/D |
| C330019G07RIK |   | x | #N/D |
| C6orf47       | x |   | #N/D |
| C77370        |   | x | #N/D |
| CASTOR2       | x |   | #N/D |
| CCDC28B       |   | x | #N/D |
| CCL15-CCL14   | x |   | #N/D |
| CCNL2         |   | x | #N/D |
| CDK16         | x |   | #N/D |
| CENPB         |   | x | #N/D |
| COL4A5        |   | x | #N/D |
| COL4A6        |   | x | #N/D |
| CSDA          |   | x | #N/D |
| CST6          | x |   | #N/D |
| D0H4S114      |   | x | #N/D |
| D19WSU162E    |   | x | #N/D |
| D3BWG0562E    |   | x | #N/D |
| D4ERTD22E     | x |   | #N/D |
| D630045J12RIK |   | x | #N/D |
| DCX           |   | x | #N/D |
| DDX3X         |   | x | #N/D |
| DGKK          |   | x | #N/D |
| DYNLT1B       |   | x | #N/D |
| EFNB1         | x |   | #N/D |
| ELOVL1        | x |   | #N/D |
| EN1           |   | x | #N/D |
| ENO2          | x |   | #N/D |
| EOMES         |   | x | #N/D |
| EPB4.1L4B     |   | x | #N/D |
| ERLIN2        |   | x | #N/D |
| EXOSC4        | x |   | #N/D |

|          |   |   |      |
|----------|---|---|------|
| FAM123B  |   | x | #N/D |
| FAM70A   |   | x | #N/D |
| FBXW9    |   | x | #N/D |
| FOS      |   | x | #N/D |
| FOXJ2    |   | x | #N/D |
| FOXL1    | x |   | #N/D |
| FOXP3    | x |   | #N/D |
| FRAT2    |   | x | #N/D |
| GDF3     | x |   | #N/D |
| GLA      | x |   | #N/D |
| GM11818  | x |   | #N/D |
| Gm14137  |   | x | #N/D |
| GM1587   | x |   | #N/D |
| GM749    | x |   | #N/D |
| GNL3L    | x |   | #N/D |
| HDAC8    | x |   | #N/D |
| HNRNPCL1 | x |   | #N/D |
| HOXA1    | x |   | #N/D |
| HTR2C    |   | x | #N/D |
| IGSF1    |   | x | #N/D |
| ING5     | x |   | #N/D |
| KDM5C    | x | x | #N/D |
| KIFC2    |   | x | #N/D |
| MAFB     |   | x | #N/D |
| MAFG     |   | x | #N/D |
| MAZ      |   | x | #N/D |
| MORF4L2  |   | x | #N/D |
| NAP1L3   |   | x | #N/D |
| NHSL2    | x |   | #N/D |
| NKRF     |   | x | #N/D |
| NLGN3    | x | x | #N/D |
| NNAT     | x |   | #N/D |
| NPAS4    |   | x | #N/D |
| NTF4     | x |   | #N/D |
| NUDT11   |   | x | #N/D |
| NXT2     | x |   | #N/D |
| ORF61    |   | x | #N/D |
| P2RY4    | x |   | #N/D |
| PCYT1B   |   | x | #N/D |
| PDGFA    |   | x | #N/D |
| PEX5     |   | x | #N/D |
| PHC1     |   | x | #N/D |
| PIGV     | x |   | #N/D |
| PLP1     |   | x | #N/D |
| POU3F1   | x |   | #N/D |
| PPM1D    |   | x | #N/D |
| PPP1R3D  |   | x | #N/D |
| PRR3     | x | x | #N/D |
| PYCR1    | x |   | #N/D |
| RBM34    | x |   | #N/D |



|           |   |   |      |
|-----------|---|---|------|
| REPS2     |   | x | #N/D |
| RLIM      |   | x | #N/D |
| SCML2     |   | x | #N/D |
| SCRT1     | x |   | #N/D |
| SEMA4C    | x |   | #N/D |
| SETD8     |   | x | #N/D |
| SH3RF3    |   | x | #N/D |
| SHH       | x |   | #N/D |
| SHROOM2   |   | x | #N/D |
| SLC16A2   |   | x | #N/D |
| SLC25A52  | x |   | #N/D |
| SLC35E2B  | x |   | #N/D |
| SMS       |   | x | #N/D |
| SOCS1     |   | x | #N/D |
| SPNA2     |   | x | #N/D |
| SPNB2     |   | x | #N/D |
| SRGAP2    |   | x | #N/D |
| STAG2     |   | x | #N/D |
| STARD8    |   | x | #N/D |
| TCEANC    | x |   | #N/D |
| TCFAP4    | x |   | #N/D |
| THOC2     | x | x | #N/D |
| TMEM55B   | x | x | #N/D |
| TRIM27    | x |   | #N/D |
| TRP53INP1 |   | x | #N/D |
| TRP53INP2 | x | x | #N/D |
| TSC22D3   |   | x | #N/D |
| TUBB      | x |   | #N/D |
| TUBB2B    |   | x | #N/D |
| XKRX      | x |   | #N/D |
| ZFP36     |   | x | #N/D |
| ZFP366    |   | x | #N/D |
| ZFP384    |   | x | #N/D |
| ZFP385C   |   | x | #N/D |
| ZFP532    |   | x | #N/D |
| ZFP629    | x |   | #N/D |
| ZFP641    |   | x | #N/D |
| ZFP652    |   | x | #N/D |
| ZFP704    |   | x | #N/D |
| ZFP827    |   | x | #N/D |

In bold significant results after Bonferroni multiple testing correction  
Yengo et al 2018. Hum Mol Genet. doi: 10.1093/hmg/ddy271.

**Table S6.** Significantly enriched KEGG pathways from the miR-29c-3p target genes

| GeneSet  | Description                                          | Size | Overlap | Expect | Ratio | pValue   | FDR      | Genes (Enterz ID)                                                                                                                                                                                                                               |
|----------|------------------------------------------------------|------|---------|--------|-------|----------|----------|-------------------------------------------------------------------------------------------------------------------------------------------------------------------------------------------------------------------------------------------------|
| hsa04974 | Protein digestion and absorption                     | 90   | 25      | 3.30   | 7.56  | 6.66E-16 | 2.17E-13 | 1278;1280;1281;1282;1284;1285;1286;1287;1288;1289;1290;1293;1294;1297;1301;1306;169044;1803;2006;23439;255631;481;50509;54407;85301                                                                                                             |
| hsa04510 | Focal adhesion                                       | 199  | 34      | 7.31   | 4.65  | 2.41E-14 | 3.93E-12 | 10000;1278;1280;1282;1284;1285;1286;1287;1288;1293;1297;22801;2932;3381;3479;3688;3915;394;5154;5155;5156;5159;5295;5500;5602;56034;5728;6714;7414;7422;8503;858;894;998                                                                        |
| hsa04151 | PI3K-Akt signaling pathway                           | 354  | 41      | 13.00  | 3.15  | 2.83E-11 | 3.08E-09 | 10000;1021;1026;1278;1280;1282;1284;1285;1286;1287;1288;1293;1297;1946;22801;2309;2538;2932;3381;3479;3688;3915;4170;4893;5154;5155;5156;5159;5295;54331;5515;55970;56034;5728;6446;7422;7531;8503;894;9470;9586                                |
| hsa04926 | Relaxin signaling pathway                            | 130  | 22      | 4.77   | 4.61  | 1.40E-09 | 1.14E-07 | 10000;1278;1281;1282;1284;1285;1286;1287;1288;1910;2353;4313;4893;5295;54331;55970;5602;6416;6714;7422;8503;9586                                                                                                                                |
| hsa05200 | Pathways in cancer                                   | 524  | 48      | 19.24  | 2.49  | 1.91E-09 | 1.24E-07 | 10000;1021;1026;1282;1284;1285;1286;1287;1288;1910;23401;2353;27113;27436;2932;3458;3479;3688;3915;405;4313;4893;5154;5155;5156;5159;5295;54331;5467;55970;5602;5728;578;5898;5915;5979;6667;7043;7187;7422;7855;8031;808;818;8503;894;9618;998 |
| hsa01521 | EGFR tyrosine kinase inhibitor resistance            | 79   | 17      | 2.90   | 5.86  | 2.49E-09 | 1.36E-07 | 10000;2309;2549;2932;3479;4893;5154;5155;5156;5159;5295;56034;5728;6714;7422;8503;9470                                                                                                                                                          |
| hsa05222 | Small cell lung cancer                               | 92   | 18      | 3.38   | 5.33  | 4.25E-09 | 1.98E-07 | 10000;1021;1026;1282;1284;1285;1286;1287;1288;3688;3915;5295;5728;578;5915;7187;8503;9618                                                                                                                                                       |
| hsa05231 | Choline metabolism in cancer                         | 99   | 18      | 3.64   | 4.95  | 1.44E-08 | 5.88E-07 | 10000;139189;160851;2353;4893;5154;5155;5156;5159;5295;5602;56034;56261;6584;6667;8503;8527;9468                                                                                                                                                |
| hsa05165 | Human papillomavirus infection                       | 339  | 35      | 12.45  | 2.81  | 1.99E-08 | 7.16E-07 | 10000;1021;1026;1278;1280;1282;1284;1285;1286;1287;1288;1293;1297;1740;22801;2932;3381;3688;3915;4893;5159;523;5295;5515;5728;578;7132;7187;7422;7855;8503;894;9586;9759;998                                                                    |
| hsa05206 | MicroRNAs in cancer                                  | 150  | 22      | 5.51   | 3.99  | 2.20E-08 | 7.16E-07 | 1021;1026;1788;1789;23405;23411;4170;4893;5154;5155;5156;5159;5728;578;599;6541;7168;7422;8651;894;90427;9759                                                                                                                                   |
| hsa05214 | Glioma                                               | 71   | 15      | 2.61   | 5.75  | 2.90E-08 | 8.60E-07 | 10000;1021;1026;3479;4893;5154;5155;5156;5159;5295;5728;578;808;818;8503                                                                                                                                                                        |
| hsa04512 | ECM-receptor interaction                             | 82   | 16      | 3.01   | 5.31  | 3.30E-08 | 8.96E-07 | 1278;1280;1282;1284;1285;1286;1287;1288;1293;1297;1605;22801;3339;3381;3688;3915                                                                                                                                                                |
| hsa04933 | AGE-RAGE signaling pathway in diabetic complications | 99   | 17      | 3.64   | 4.68  | 8.88E-08 | 2.23E-06 | 10000;1278;1281;1282;1284;1285;1286;1287;1288;4313;4893;5295;5602;7043;7422;8503;998                                                                                                                                                            |
| hsa05218 | Melanoma                                             | 72   | 14      | 2.64   | 5.30  | 2.55E-07 | 5.94E-06 | 10000;1021;1026;3479;4893;5154;5155;5156;5159;5295;56034;5728;578;8503                                                                                                                                                                          |
| hsa05167 | Kaposi sarcoma-associated herpesvirus infection      | 186  | 22      | 6.83   | 3.22  | 1.05E-06 | 2.28E-05 | 10000;1021;1026;2353;2932;4775;4776;4893;5155;5295;54331;55970;5602;578;6416;6714;7132;7187;7422;7538;808;8503                                                                                                                                  |
| hsa05215 | Prostate cancer                                      | 97   | 15      | 3.56   | 4.21  | 2.08E-06 | 4.24E-05 | 10000;1026;2932;3479;3645;4893;5154;5155;5156;5159;5295;56034;5728;8503;9586                                                                                                                                                                    |

|          |                                         |     |    |      |      |          |          |                                                                                                                    |
|----------|-----------------------------------------|-----|----|------|------|----------|----------|--------------------------------------------------------------------------------------------------------------------|
| hsa05205 | Proteoglycans in cancer                 | 198 | 22 | 7.27 | 3.03 | 3.03E-06 | 5.81E-05 | 10000;1026;1839;2549;286;288;3339;3479;3688;4313;4893;5295;5500;5781;6714;7074;7422;7855;818;8503;858;998          |
| hsa05211 | Renal cell carcinoma                    | 69  | 12 | 2.53 | 4.74 | 6.39E-06 | 1.16E-04 | 10000;1026;2549;405;4893;5155;5295;5781;7043;7422;8503;998                                                         |
| hsa04917 | Prolactin signaling pathway             | 70  | 12 | 2.57 | 4.67 | 7.46E-06 | 1.28E-04 | 10000;2309;2353;2932;30837;4893;5295;5602;6714;8503;8651;894                                                       |
| hsa05146 | Amoebiasis                              | 96  | 14 | 3.53 | 3.97 | 9.26E-06 | 1.51E-04 | 1278;1281;1282;1284;1285;1286;1287;1288;3458;3915;5295;7043;7414;8503                                              |
| hsa05161 | Hepatitis B                             | 144 | 17 | 5.29 | 3.21 | 1.88E-05 | 2.92E-04 | 10000;1021;1026;1654;2353;3339;4775;4776;4893;5295;5602;5728;6416;6714;7043;8503;9586                              |
| hsa04360 | Axon guidance                           | 175 | 19 | 6.43 | 2.96 | 2.03E-05 | 3.01E-04 | 1073;1808;1946;2049;23380;27289;2932;3688;4775;4776;4893;5295;56896;5781;6091;6714;818;8503;998                    |
| hsa04014 | Ras signaling pathway                   | 232 | 22 | 8.52 | 2.58 | 3.85E-05 | 5.46E-04 | 10000;1946;2549;3363;3479;4893;5154;5155;5156;5159;5295;54331;55970;5602;56034;5781;5898;7074;7422;808;8503;998    |
| hsa05418 | Fluid shear stress and atherosclerosis  | 138 | 16 | 5.07 | 3.16 | 4.15E-05 | 5.64E-04 | 10000;2353;3458;4313;5154;5155;5295;5602;6416;657;6714;7132;7422;808;8503;858                                      |
| hsa05166 | Human T-cell leukemia virus 1 infection | 255 | 23 | 9.36 | 2.46 | 5.64E-05 | 7.08E-04 | 10000;1026;2353;2932;4055;4605;4775;4776;4893;5154;5155;5156;5159;5295;54107;6416;7043;7132;7538;7855;821;8503;894 |
| hsa04012 | ErbB signaling pathway                  | 85  | 12 | 3.12 | 3.84 | 5.65E-05 | 7.08E-04 | 10000;1026;1839;2549;2932;4893;5295;5602;6416;6714;818;8503                                                        |
| hsa04015 | Rap1 signaling pathway                  | 206 | 20 | 7.56 | 2.64 | 6.26E-05 | 7.39E-04 | 10000;1268;1500;1946;3479;3688;4893;5154;5155;5156;5159;5295;56034;5898;6714;7074;7422;808;8503;998                |
| hsa05210 | Colorectal cancer                       | 86  | 12 | 3.16 | 3.80 | 6.35E-05 | 7.39E-04 | 10000;1026;2353;27113;2932;4893;5295;5602;578;5898;7043;8503                                                       |
| hsa04218 | Cellular senescence                     | 160 | 17 | 5.88 | 2.89 | 7.35E-05 | 8.27E-04 | 10000;1021;1026;2309;23411;4605;4775;4776;4893;5295;5500;5728;677;7043;808;8503;894                                |
| hsa04540 | Gap junction                            | 88  | 12 | 3.23 | 3.71 | 7.99E-05 | 8.43E-04 | 3358;347733;4893;5154;5155;5156;5159;5592;56034;57369;6714;7280                                                    |
| hsa05212 | Pancreatic cancer                       | 75  | 11 | 2.75 | 3.99 | 8.08E-05 | 8.43E-04 | 10000;1021;1026;5295;5602;578;5898;7043;7422;8503;998                                                              |
| hsa04072 | Phospholipase D signaling pathway       | 146 | 16 | 5.36 | 2.98 | 8.27E-05 | 8.43E-04 | 10000;139189;160851;2549;26052;4893;5154;5155;5156;5159;5295;56034;5781;5898;8503;8527                             |
| hsa05223 | Non-small cell lung cancer              | 66  | 10 | 2.42 | 4.13 | 1.29E-04 | 0.001274 | 10000;1021;1026;2309;27436;4893;5295;578;5915;8503                                                                 |
| hsa05163 | Human cytomegalovirus infection         | 225 | 20 | 8.26 | 2.42 | 2.12E-04 | 0.00203  | 10000;1021;1026;2932;4775;4776;4893;5156;5295;54331;55970;578;6376;6667;6714;7132;7422;808;8503;9586               |
| hsa01522 | Endocrine resistance                    | 98  | 12 | 3.60 | 3.33 | 2.28E-04 | 0.002108 | 10000;1026;1839;2353;3479;4313;4893;5295;5602;6667;6714;8503                                                       |
| hsa05213 | Endometrial cancer                      | 58  | 9  | 2.13 | 4.23 | 2.33E-04 | 0.002108 | 10000;1026;2309;2932;4893;5295;5728;578;8503                                                                       |
| hsa04630 | JAK-STAT signaling pathway              | 162 | 16 | 5.95 | 2.69 | 2.81E-04 | 0.002477 | 10000;1026;30837;3458;3952;3976;4170;5154;5155;5156;5159;5295;5781;8503;8651;894                                   |
| hsa04810 | Regulation of actin cytoskeleton        | 213 | 19 | 7.82 | 2.43 | 2.91E-04 | 0.0025   | 10458;1073;22801;3645;3688;4893;5154;5155;5156;5159;5295;5500;55970;56034;6714;7074;7414;8503;998                  |

|          |                                                            |     |    |       |      |          |          |                                                                                                            |
|----------|------------------------------------------------------------|-----|----|-------|------|----------|----------|------------------------------------------------------------------------------------------------------------|
| hsa04068 | FoxO signaling pathway                                     | 132 | 14 | 4.85  | 2.89 | 3.24E-04 | 0.002711 | 10000;1026;2309;23411;2538;3479;4893;5295;5602;5728;6446;7043;8503;894                                     |
| hsa05100 | Bacterial invasion of epithelial cells                     | 74  | 10 | 2.72  | 3.68 | 3.39E-04 | 0.002764 | 2549;26052;3688;5295;63916;6714;7414;8503;858;998                                                          |
| hsa04722 | Neurotrophin signaling pathway                             | 119 | 13 | 4.37  | 2.97 | 3.96E-04 | 0.003148 | 10000;2309;2549;2932;4893;5295;5602;5781;7531;808;818;8503;998                                             |
| hsa04931 | Insulin resistance                                         | 107 | 12 | 3.93  | 3.05 | 5.19E-04 | 0.004027 | 10000;2538;2932;5295;5500;5509;5602;5728;5781;7132;8503;9586                                               |
| hsa04550 | Signaling pathways regulating pluripotency of stem cells   | 139 | 14 | 5.10  | 2.74 | 5.52E-04 | 0.004182 | 10000;10336;2932;3479;3670;3720;3976;4893;5295;657;7855;8503;9314;9869                                     |
| hsa04668 | TNF signaling pathway                                      | 110 | 12 | 4.04  | 2.97 | 6.68E-04 | 0.004947 | 10000;153090;2353;3976;5295;5602;6376;6416;7132;7187;8503;9586                                             |
| hsa04215 | Apoptosis                                                  | 32  | 6  | 1.18  | 5.11 | 9.39E-04 | 0.006799 | 27113;5602;56616;57448;578;7132                                                                            |
| hsa05224 | Breast cancer                                              | 147 | 14 | 5.40  | 2.59 | 9.65E-04 | 0.006838 | 10000;1021;1026;23401;2353;2932;3479;4893;5295;5728;578;6667;7855;8503                                     |
| hsa04066 | HIF-1 signaling pathway                                    | 100 | 11 | 3.67  | 3.00 | 0.001038 | 0.007198 | 10000;1026;3458;3479;405;4055;5295;7422;818;8503;9470                                                      |
| hsa04152 | AMPK signaling pathway                                     | 120 | 12 | 4.41  | 2.72 | 0.001446 | 0.00982  | 10000;2309;23411;2538;3156;3479;3952;51552;5295;5515;8503;9586                                             |
| hsa05220 | Chronic myeloid leukemia                                   | 76  | 9  | 2.79  | 3.22 | 0.001751 | 0.011651 | 10000;1021;1026;4893;5295;578;5781;7043;8503                                                               |
| hsa04960 | Aldosterone-regulated sodium reabsorption                  | 37  | 6  | 1.36  | 4.42 | 0.002065 | 0.013462 | 23439;3479;481;5295;6446;8503                                                                              |
| hsa05230 | Central carbon metabolism in cancer                        | 65  | 8  | 2.39  | 3.35 | 0.002445 | 0.015629 | 10000;4893;5156;5159;5295;5728;5979;8503                                                                   |
| hsa04670 | Leukocyte transendothelial migration                       | 112 | 11 | 4.11  | 2.67 | 0.002609 | 0.016358 | 1500;3688;394;4313;50848;5295;5781;7414;8503;9076;998                                                      |
| hsa04010 | MAPK signaling pathway                                     | 295 | 21 | 10.83 | 1.94 | 0.002685 | 0.016514 | 10000;1844;1946;2353;3479;3556;4775;4893;5154;5155;5156;5159;55970;5602;56034;6416;7043;7132;7422;9448;998 |
| hsa05225 | Hepatocellular carcinoma                                   | 167 | 14 | 6.13  | 2.28 | 0.003238 | 0.019162 | 10000;1021;1026;23401;2549;2932;4893;5295;5728;578;6599;7043;7855;8503                                     |
| hsa05120 | Epithelial cell signaling in Helicobacter pylori infection | 68  | 8  | 2.50  | 3.20 | 0.003258 | 0.019162 | 1839;50848;523;5602;5781;6416;6714;998                                                                     |
| hsa04750 | Inflammatory mediator regulation of TRP channels           | 99  | 10 | 3.64  | 2.75 | 0.003292 | 0.019162 | 3358;3479;3556;5295;5500;5602;6714;808;818;8503                                                            |

|          |                                           |     |    |      |      |          |          |                                                                         |
|----------|-------------------------------------------|-----|----|------|------|----------|----------|-------------------------------------------------------------------------|
| hsa05219 | Bladder cancer                            | 41  | 6  | 1.51 | 3.99 | 0.003533 | 0.020093 | 1026;1839;4313;4893;6714;7422                                           |
| hsa04150 | mTOR signaling pathway                    | 151 | 13 | 5.54 | 2.34 | 0.003575 | 0.020093 | 10000;253260;2932;3479;4893;523;5295;5728;6446;7132;7855;8503;9470      |
| hsa04660 | T cell receptor signaling pathway         | 101 | 10 | 3.71 | 2.70 | 0.003807 | 0.021038 | 10000;2353;2932;29851;3458;4775;4893;5295;8503;998                      |
| hsa05142 | Chagas disease (American trypanosomiasis) | 102 | 10 | 3.75 | 2.67 | 0.004088 | 0.022125 | 10000;2353;3458;5295;5515;5602;6416;7043;7132;8503                      |
| hsa04210 | Apoptosis                                 | 136 | 12 | 4.99 | 2.40 | 0.00414  | 0.022125 | 10000;153090;2353;27113;4170;4893;5295;5602;56616;578;7132;8503         |
| hsa04910 | Insulin signaling pathway                 | 137 | 12 | 5.03 | 2.39 | 0.004393 | 0.023099 | 10000;2538;2932;4893;5295;5500;5509;5602;808;8503;8651;9470             |
| hsa04625 | C-type lectin receptor signaling pathway  | 104 | 10 | 3.82 | 2.62 | 0.004699 | 0.024316 | 10000;4775;4776;4893;5295;5602;5781;6714;808;8503                       |
| hsa04973 | Carbohydrate digestion and absorption     | 44  | 6  | 1.62 | 3.71 | 0.00506  | 0.025385 | 10000;23439;2538;481;5295;8503                                          |
| hsa01524 | Platinum drug resistance                  | 73  | 8  | 2.68 | 2.98 | 0.005062 | 0.025385 | 10000;1026;1317;27113;5295;578;5980;8503                                |
| hsa04211 | Longevity regulating pathway              | 89  | 9  | 3.27 | 2.75 | 0.005167 | 0.025523 | 10000;2309;23411;3479;4893;5295;8503;9470;9586                          |
| hsa04370 | VEGF signaling pathway                    | 59  | 7  | 2.17 | 3.23 | 0.005545 | 0.026982 | 10000;4893;5295;6714;7422;8503;998                                      |
| hsa04024 | cAMP signaling pathway                    | 199 | 15 | 7.31 | 2.05 | 0.006355 | 0.030467 | 10000;117;23439;2353;481;493;5021;5295;5500;5602;7074;808;818;8503;9586 |
| hsa04912 | GnRH signaling pathway                    | 93  | 9  | 3.42 | 2.64 | 0.006888 | 0.032391 | 1839;4313;4893;5602;6416;6714;808;818;998                               |
| hsa05203 | Viral carcinogenesis                      | 201 | 15 | 7.38 | 2.03 | 0.006955 | 0.032391 | 1021;1026;1654;4055;4893;5295;578;6714;7187;7531;8503;894;9586;9759;998 |
| hsa04140 | Autophagy                                 | 128 | 11 | 4.70 | 2.34 | 0.007229 | 0.03253  | 10000;4893;51100;5295;55014;5515;5602;5728;79065;8503;9110              |
| hsa04310 | Wnt signaling pathway                     | 146 | 12 | 5.36 | 2.24 | 0.007272 | 0.03253  | 23002;23401;23500;2932;4775;4776;5467;5602;56998;7855;818;894           |
| hsa04213 | Longevity regulating pathway              | 62  | 7  | 2.28 | 3.07 | 0.007284 | 0.03253  | 10000;2309;23411;3479;4893;5295;8503                                    |
| hsa05226 | Gastric cancer                            | 148 | 12 | 5.43 | 2.21 | 0.008079 | 0.035589 | 10000;1026;23401;2549;2932;4893;5295;578;5915;7043;7855;8503            |
| hsa04728 | Dopaminergic synapse                      | 131 | 11 | 4.81 | 2.29 | 0.008559 | 0.036714 | 10000;2353;2932;54331;5500;5515;55970;5602;808;818;9586                 |
| hsa05160 | Hepatitis C                               | 131 | 11 | 4.81 | 2.29 | 0.008559 | 0.036714 | 10000;1026;2932;4893;5295;5515;5602;7132;7187;8503;9076                 |
| hsa04919 | Thyroid hormone signaling pathway         | 116 | 10 | 4.26 | 2.35 | 0.010013 | 0.042392 | 10000;1734;23439;2932;481;4893;5295;6567;6714;8503                      |

|          |                                          |     |    |      |      |          |          |                                                                            |
|----------|------------------------------------------|-----|----|------|------|----------|----------|----------------------------------------------------------------------------|
| hsa04070 | Phosphatidylinositol signaling system    | 99  | 9  | 3.64 | 2.48 | 0.010253 | 0.042854 | 139189;160851;23262;5295;5728;808;8503;8527;9110                           |
| hsa05216 | Thyroid cancer                           | 37  | 5  | 1.36 | 3.68 | 0.010709 | 0.044191 | 1026;4893;578;5979;8031                                                    |
| hsa05170 | Human immunodeficiency virus 1 infection | 212 | 15 | 7.78 | 1.93 | 0.011115 | 0.045294 | 10000;1073;164;2353;4775;4776;4893;5295;54331;55970;5602;578;7132;808;8503 |
| hsa04915 | Estrogen signaling pathway               | 137 | 11 | 5.03 | 2.19 | 0.011784 | 0.047423 | 10000;1839;2353;4313;4893;5295;6667;6714;808;8503;9586                     |
| hsa05031 | Amphetamine addiction                    | 68  | 7  | 2.50 | 2.80 | 0.011928 | 0.047423 | 23411;2353;5500;6804;808;818;9586                                          |

**Table S7.** Significantly enriched KEGG pathways from the differentially expressed target genes of miR-29c-3p.

| Geneset  | Description                                          | Size | Overlap | Expect | Enrichment ratio | Pvalue     | FDR        | Overlapid                                                             |
|----------|------------------------------------------------------|------|---------|--------|------------------|------------|------------|-----------------------------------------------------------------------|
| hsa04974 | Protein digestion and absorption                     | 90   | 9       | 0.73   | 12.32            | 3.44E-08   | 1.12E-05   | 1278;1281;1285;1287;1288;1289;1290;2006;54407                         |
| hsa04510 | Focal adhesion                                       | 199  | 11      | 1.61   | 6.81             | 4.34E-07   | 6.86E-05   | 1278;1285;1287;1288;3688;3915;5602;5728;7414;8503;894                 |
| hsa05222 | Small cell lung cancer                               | 92   | 8       | 0.75   | 10.72            | 6.31E-07   | 6.86E-05   | 1021;1285;1287;1288;3688;3915;5728;8503                               |
| hsa05146 | Amoebiasis                                           | 96   | 8       | 0.78   | 10.27            | 8.77E-07   | 7.15E-05   | 1278;1281;1285;1287;1288;3915;7414;8503                               |
| hsa04151 | PI3K-Akt signaling pathway                           | 354  | 13      | 2.87   | 4.53             | 3.65E-06   | 2.07E-04   | 1021;1278;1285;1287;1288;1946;3688;3915;55970;5728;6446;8503;894      |
| hsa04512 | ECM-receptor interaction                             | 82   | 7       | 0.67   | 10.52            | 3.81E-06   | 2.07E-04   | 1278;1285;1287;1288;3339;3688;3915                                    |
| hsa04926 | Relaxin signaling pathway                            | 130  | 8       | 1.05   | 7.58             | 8.68E-06   | 4.04E-04   | 1278;1281;1285;1287;1288;55970;5602;8503                              |
| hsa04933 | AGE-RAGE signaling pathway in diabetic complications | 99   | 7       | 0.80   | 8.71             | 1.34E-05   | 5.46E-04   | 1278;1281;1285;1287;1288;5602;8503                                    |
| hsa04218 | Cellular senescence                                  | 160  | 8       | 1.30   | 6.16             | 3.94E-05   | 0.00142865 | 1021;4605;4775;4776;5728;677;8503;894                                 |
| hsa05200 | Pathways in cancer                                   | 524  | 14      | 4.25   | 3.29             | 5.53E-05   | 0.0018017  | 1021;1285;1287;1288;3688;3915;55970;5602;5728;5898;6667;8031;8503;894 |
| hsa05165 | Human papillomavirus infection                       | 339  | 11      | 2.75   | 4.00             | 7.18E-05   | 0.0021291  | 1021;1278;1285;1287;1288;3688;3915;5728;7132;8503;894                 |
| hsa05167 | Kaposi sarcoma-associated herpesvirus infection      | 186  | 8       | 1.51   | 5.30             | 1.15E-04   | 0.00311137 | 1021;4775;4776;55970;5602;7132;7538;8503                              |
| hsa05161 | Hepatitis B                                          | 144  | 7       | 1.17   | 5.99             | 1.49E-04   | 0.00373505 | 1021;3339;4775;4776;5602;5728;8503                                    |
| hsa05166 | Human T-cell leukemia virus 1 infection              | 255  | 8       | 2.07   | 3.87             | 9.65E-04   | 0.0224594  | 4055;4605;4775;4776;7132;7538;8503;894                                |
| hsa04310 | Wnt signaling pathway                                | 146  | 6       | 1.18   | 5.06             | 0.00110967 | 0.02410388 | 23002;23500;4775;4776;5602;894                                        |
| hsa05231 | Choline metabolism in cancer                         | 99   | 5       | 0.80   | 6.22             | 0.00118301 | 0.02410388 | 5602;56261;6584;6667;8503                                             |
| hsa04625 | C-type lectin receptor signaling pathway             | 104  | 5       | 0.84   | 5.92             | 0.0014749  | 0.02765645 | 4775;4776;5602;5781;8503                                              |
| hsa05170 | Human immunodeficiency virus 1 infection             | 212  | 7       | 1.72   | 4.07             | 0.00152704 | 0.02765645 | 164;4775;4776;55970;5602;7132;8503                                    |
| hsa04931 | Insulin resistance                                   | 107  | 5       | 0.87   | 5.76             | 0.00167373 | 0.02871775 | 5602;5728;5781;7132;8503                                              |
| hsa05163 | Human cytomegalovirus infection                      | 225  | 7       | 1.83   | 3.83             | 0.00214685 | 0.03499371 | 1021;4775;4776;55970;6667;7132;8503                                   |
| hsa04014 | Ras signaling pathway                                | 232  | 7       | 1.88   | 3.72             | 0.00255311 | 0.03963392 | 1946;2549;55970;5602;5781;5898;8503                                   |
| hsa04360 | Axon guidance                                        | 175  | 6       | 1.42   | 4.23             | 0.00279394 | 0.04140116 | 1946;3688;4775;4776;5781;8503                                         |
| hsa05100 | Bacterial invasion of epithelial cells               | 74   | 4       | 0.60   | 6.66             | 0.00294841 | 0.04179053 | 2549;3688;7414;8503                                                   |
| hsa05212 | Pancreatic cancer                                    | 75   | 4       | 0.61   | 6.57             | 0.00309587 | 0.04205219 | 1021;5602;5898;8503                                                   |
| hsa04140 | Autophagy                                            | 128  | 5       | 1.04   | 4.81             | 0.00366009 | 0.04772759 | 51100;5602;5728;8503;9110                                             |

**Table S8.** Significantly enriched Reactome pathways from the differentially expressed target genes of miR-29c-3p or miR-665-3p.

| miRNA      | Geneset       | Description                                                  | Size | Overlap | Expect | Enrichment |          |            | Overlapid                                                                                                  |
|------------|---------------|--------------------------------------------------------------|------|---------|--------|------------|----------|------------|------------------------------------------------------------------------------------------------------------|
|            |               |                                                              |      |         |        | Ratio      | Pvalue   | FDR        |                                                                                                            |
| miR-29c-3p | R-HSA-1474244 | Extracellular matrix organization                            | 301  | 21      | 2.48   | 8.46       | 2.51E-14 | 4.34E-11   | 1278;1281;1285;1287;1288;1289;1290;1295;1307;1310;2006;22795;23473;3339;3688;3915;4237;56999;8038;871;8728 |
| miR-29c-3p | R-HSA-1474228 | Degradation of the extracellular matrix                      | 140  | 15      | 1.15   | 13.00      | 3.79E-13 | 3.27E-10   | 1278;1281;1285;1287;1288;1289;1290;1295;1307;1310;2006;23473;3339;3915;56999                               |
| miR-29c-3p | R-HSA-8948216 | Collagen chain trimerization                                 | 44   | 10      | 0.36   | 27.57      | 1.68E-12 | 9.70E-10   | 1278;1281;1285;1287;1288;1289;1290;1295;1307;1310                                                          |
| miR-29c-3p | R-HSA-1650814 | Collagen biosynthesis and modifying enzymes                  | 67   | 11      | 0.55   | 19.91      | 5.51E-12 | 2.38E-09   | 1278;1281;1285;1287;1288;1289;1290;1295;1307;1310;871                                                      |
| miR-29c-3p | R-HSA-3000171 | Non-integrin membrane-ECM interactions                       | 59   | 10      | 0.49   | 20.56      | 3.86E-11 | 1.33E-08   | 1278;1281;1285;1287;1288;1289;1290;3339;3688;3915                                                          |
| miR-29c-3p | R-HSA-216083  | Integrin cell surface interactions                           | 85   | 11      | 0.70   | 15.70      | 8.11E-11 | 2.22E-08   | 1278;1281;1285;1287;1288;1289;1290;1295;1307;3339;3688                                                     |
| miR-29c-3p | R-HSA-1442490 | Collagen degradation                                         | 64   | 10      | 0.53   | 18.95      | 8.99E-11 | 2.22E-08   | 1278;1281;1285;1287;1288;1289;1290;1295;1307;1310                                                          |
| miR-29c-3p | R-HSA-1474290 | Collagen formation                                           | 90   | 11      | 0.74   | 14.83      | 1.53E-10 | 3.31E-08   | 1278;1281;1285;1287;1288;1289;1290;1295;1307;1310;871                                                      |
| miR-29c-3p | R-HSA-3000178 | ECM proteoglycans                                            | 76   | 10      | 0.63   | 15.96      | 5.23E-10 | 1.00E-07   | 1278;1281;1285;1287;1288;1289;1290;3339;3688;3915                                                          |
| miR-29c-3p | R-HSA-3000157 | Laminin interactions                                         | 30   | 7       | 0.25   | 28.30      | 3.54E-09 | 6.11E-07   | 1285;1287;1288;22795;3339;3688;3915                                                                        |
| miR-29c-3p | R-HSA-2022090 | Assembly of collagen fibrils and other multimeric structures | 61   | 8       | 0.50   | 15.91      | 3.17E-08 | 4.99E-06   | 1278;1281;1285;1287;1288;1289;1290;1295                                                                    |
| miR-29c-3p | R-HSA-8875878 | MET promotes cell motility                                   | 41   | 7       | 0.34   | 20.71      | 3.63E-08 | 5.23E-06   | 1278;1281;1289;1290;2549;3688;3915                                                                         |
| miR-29c-3p | R-HSA-8874081 | MET activates PTK2 signaling                                 | 30   | 6       | 0.25   | 24.26      | 1.34E-07 | 1.78E-05   | 1278;1281;1289;1290;3688;3915                                                                              |
| miR-29c-3p | R-HSA-6806834 | Signaling by MET                                             | 79   | 8       | 0.65   | 12.28      | 2.49E-07 | 3.08E-05   | 1278;1281;1289;1290;2549;3688;3915;5781                                                                    |
| miR-29c-3p | R-HSA-3000170 | Syndecan interactions                                        | 27   | 5       | 0.22   | 22.46      | 2.37E-06 | 2.73E-04   | 1278;1281;1289;1290;3688                                                                                   |
| miR-29c-3p | R-HSA-2214320 | Anchoring fibril formation                                   | 15   | 4       | 0.12   | 32.35      | 5.49E-06 | 5.93E-04   | 1278;1285;1287;1288                                                                                        |
| miR-29c-3p | R-HSA-186797  | Signaling by PDGF                                            | 58   | 6       | 0.48   | 12.55      | 7.57E-06 | 7.70E-04   | 1281;1285;1287;1289;1290;5781                                                                              |
| miR-29c-3p | R-HSA-2243919 | Crosslinking of collagen fibrils                             | 18   | 4       | 0.15   | 26.96      | 1.21E-05 | 1.16E-03   | 1278;1285;1287;1288                                                                                        |
| miR-29c-3p | R-HSA-9006934 | Signaling by Receptor Tyrosine Kinases                       | 455  | 14      | 3.75   | 3.73       | 1.89E-05 | 1.72E-03   | 1278;1281;1285;1287;1289;1290;2549;3688;3915;5781;5796;5898;8038;8503                                      |
| miR-29c-3p | R-HSA-419037  | NCAM1 interactions                                           | 42   | 5       | 0.35   | 14.44      | 2.27E-05 | 1.96E-03   | 1281;1285;1287;1289;1290                                                                                   |
| miR-29c-3p | R-HSA-375165  | NCAM signaling for neurite out-growth                        | 63   | 5       | 0.52   | 9.63       | 1.64E-04 | 0.01346915 | 1281;1285;1287;1289;1290                                                                                   |
| miR-29c-3p | R-HSA-8934593 | Regulation of RUNX1 Expression and Activity                  | 17   | 3       | 0.14   | 21.41      | 3.39E-04 | 0.02659031 | 1021;5781;894                                                                                              |
| miR-29c-3p | R-HSA-177929  | Signaling by EGFR                                            | 43   | 4       | 0.35   | 11.28      | 4.16E-04 | 0.03126549 | 2549;5781;5796;8038                                                                                        |
| miR-29c-3p | R-HSA-8865999 | MET activates PTPN11                                         | 5    | 2       | 0.04   | 48.52      | 6.61E-04 | 0.04760224 | 2549;5781                                                                                                  |
| miR-665-3p | R-HSA-556833  | Metabolism of lipids                                         | 737  | 13      | 3.49   | 3.72E      | 2.67E-05 | 0.0461916  | 10226;11145;114882;166929;26027;26063;2717;4520;56261;6309;63874;64834;9110                                |



**Table S9.** Significantly enriched GO Biological process from the differentially expressed target genes of miR-29c-3p, miR-665-3p or miR-137-3p

| miRNA      | Geneset    | Description                                                   | Size | Overlap | Expect | Enrichment |          |            | Overlapid                                                                                                                                                             |
|------------|------------|---------------------------------------------------------------|------|---------|--------|------------|----------|------------|-----------------------------------------------------------------------------------------------------------------------------------------------------------------------|
|            |            |                                                               |      |         |        | Ratio      | Pvalue   | FDR        |                                                                                                                                                                       |
| miR-29c-3p | GO:0030198 | extracellular matrix organization                             | 347  | 22      | 2.71   | 8.13       | 2.95E-14 | 2.68E-10   | 871;1278;1281;1285;1287;1288;1289;1290;1295;1307;1310;2006;3339;3688;3915;4237;5806;7132;8038;8728;22795;56999                                                        |
| miR-29c-3p | GO:0043062 | extracellular structure organization                          | 400  | 22      | 3.12   | 7.05       | 5.29E-13 | 2.41E-09   | 871;1278;1281;1285;1287;1288;1289;1290;1295;1307;1310;2006;3339;3688;3915;4237;5806;7132;8038;8728;22795;56999                                                        |
| miR-29c-3p | GO:0031589 | cell-substrate adhesion                                       | 332  | 16      | 2.59   | 6.18       | 6.70E-09 | 2.03E-05   | 1021;1281;1295;1307;1946;3688;3915;5728;5796;7414;9341;9448;10979;22795;56999;158326                                                                                  |
| miR-29c-3p | GO:0007160 | cell-matrix adhesion                                          | 216  | 13      | 1.69   | 7.71       | 1.40E-08 | 3.18E-05   | 1021;1281;1307;1946;3688;5728;5796;7414;9448;10979;22795;56999;158326                                                                                                 |
| miR-29c-3p | GO:0072359 | circulatory system development                                | 1026 | 25      | 8.00   | 3.12       | 3.09E-07 | 5.62E-04   | 56999;65009                                                                                                                                                           |
| miR-29c-3p | GO:0007155 | cell adhesion                                                 | 1369 | 29      | 10.68  | 2.72       | 5.61E-07 | 8.22E-04   | 677;1021;1281;1285;1288;1289;1295;1307;1310;1946;3556;3688;3915;5728;5781;5796;7414;8038;8728;9341;9448;10979;227                                                     |
| miR-29c-3p | GO:0022610 | biological adhesion                                           | 1377 | 29      | 10.74  | 2.70       | 6.33E-07 | 8.22E-04   | 95;56134;56138;56147;56999;158326;220296                                                                                                                              |
| miR-29c-3p | GO:0001944 | vasculature development                                       | 682  | 19      | 5.32   | 3.57       | 1.41E-06 | 1.60E-03   | 657;677;1278;1281;1285;1289;1295;2549;3339;3688;4775;4776;5168;5728;6667;7798;8038;8503;56999                                                                         |
| miR-29c-3p | GO:0072358 | cardiovascular system development                             | 691  | 19      | 5.39   | 3.52       | 1.71E-06 | 1.73E-03   | 657;677;1278;1281;1285;1289;1295;2549;3339;3688;4775;4776;5168;5728;6667;7798;8038;8503;56999                                                                         |
| miR-29c-3p | GO:0001568 | blood vessel development                                      | 654  | 18      | 5.10   | 3.53       | 3.25E-06 | 2.95E-03   | 657;677;1278;1281;1285;1289;1295;2549;3339;3688;4776;5168;5728;6667;7798;8038;8503;56999                                                                              |
| miR-29c-3p | GO:0034333 | adherens junction assembly                                    | 88   | 7       | 0.69   | 10.20      | 5.62E-06 | 4.64E-03   | 1307;1946;5728;5796;7414;9448;10979                                                                                                                                   |
| miR-29c-3p | GO:0051093 | negative regulation of developmental process                  | 905  | 21      | 7.06   | 2.97       | 6.70E-06 | 5.08E-03   | 657;677;1021;1281;1285;1289;1290;1946;3339;3688;3720;4775;4776;5376;5728;7538;9448;11173;23500;28951;56999                                                            |
| miR-29c-3p | GO:0007044 | cell-substrate junction assembly                              | 95   | 7       | 0.74   | 9.45       | 9.34E-06 | 6.53E-03   | 1307;1946;3915;5728;5796;9448;10979                                                                                                                                   |
| miR-29c-3p | GO:0007507 | heart development                                             | 536  | 15      | 4.18   | 3.59       | 1.89E-05 | 0.01180215 | 657;677;1281;1289;2006;3688;3720;4776;5021;5728;5781;7132;7798;56999;65009                                                                                            |
| miR-29c-3p | GO:2000026 | regulation of multicellular organismal development            | 1908 | 32      | 14.88  | 2.15       | 1.95E-05 | 0.01180215 | 657;677;1021;1281;1285;1289;1290;1946;2549;3339;3556;3688;3720;4775;4776;5021;5168;5376;5728;6667;7132;7538;8038;9448;11173;22849;23002;23072;23500;26039;56999;65009 |
| miR-29c-3p | GO:0045596 | negative regulation of cell differentiation                   | 678  | 17      | 5.29   | 3.21       | 2.09E-05 | 0.01189067 | 657;677;1021;1281;1289;1290;1946;3688;4775;4776;5376;5728;7538;9448;11173;23500;28951                                                                                 |
| miR-29c-3p | GO:0051241 | negative regulation of multicellular organismal process       | 1143 | 23      | 8.92   | 2.58       | 2.35E-05 | 0.01216618 | 657;677;1021;1281;1285;1289;1290;3339;3720;4775;4776;5021;5376;5728;5781;7132;7538;9448;11173;23500;28951;56999;57561                                                 |
| miR-29c-3p | GO:0007492 | endoderm development                                          | 74   | 6       | 0.58   | 10.39      | 2.41E-05 | 0.01216618 | 657;677;1289;1290;1295;3915                                                                                                                                           |
| miR-29c-3p | GO:0007045 | cell-substrate adherens junction assembly                     | 79   | 6       | 0.62   | 9.74       | 3.50E-05 | 0.01591511 | 1307;1946;5728;5796;9448;10979                                                                                                                                        |
| miR-29c-3p | GO:0048041 | focal adhesion assembly                                       | 79   | 6       | 0.62   | 9.74       | 3.50E-05 | 0.01591511 | 1307;1946;5728;5796;9448;10979                                                                                                                                        |
| miR-29c-3p | GO:0030199 | collagen fibril organization                                  | 49   | 5       | 0.38   | 13.08      | 3.87E-05 | 0.01676791 | 871;1278;1281;1289;1290                                                                                                                                               |
| miR-29c-3p | GO:0048514 | blood vessel morphogenesis                                    | 574  | 15      | 4.48   | 3.35       | 4.16E-05 | 0.01717549 | 657;677;1281;1285;1295;2549;3339;3688;4776;5168;5728;6667;8038;8503;56999                                                                                             |
| miR-29c-3p | GO:0038063 | collagen-activated tyrosine kinase receptor signaling pathway | 10   | 3       | 0.08   | 38.46      | 5.35E-05 | 0.01964372 | 1285;1287;1288                                                                                                                                                        |
| miR-29c-3p | GO:0061157 | mRNA destabilization                                          | 27   | 4       | 0.21   | 18.99      | 5.40E-05 | 0.01964372 | 677;7538;22849;253943                                                                                                                                                 |
| miR-29c-3p | GO:0035239 | tube morphogenesis                                            | 806  | 18      | 6.29   | 2.86       | 5.40E-05 | 0.01964372 | 657;677;1281;1285;1295;2549;3339;3688;4776;5168;5728;5898;6667;7798;8038;8503;56999;65009                                                                             |
| miR-29c-3p | GO:0050779 | RNA destabilization                                           | 29   | 4       | 0.23   | 17.68      | 7.22E-05 | 0.02524522 | 677;7538;22849;253943                                                                                                                                                 |
| miR-29c-3p | GO:0035295 | tube development                                              | 992  | 20      | 7.74   | 2.58       | 8.36E-05 | 0.02814293 | 657;677;1281;1285;1295;2549;3339;3688;4774;4776;5021;5168;5728;5898;6667;7798;8038;8503;56999;65009                                                                   |
| miR-29c-3p | GO:0034332 | adherens junction organization                                | 139  | 7       | 1.08   | 6.46       | 1.09E-04 | 0.03528388 | 1307;1946;5728;5796;7414;9448;10979                                                                                                                                   |
| miR-29c-3p | GO:0038065 | collagen-activated signaling pathway                          | 13   | 3       | 0.10   | 29.58      | 1.25E-04 | 0.03928271 | 1285;1287;1288                                                                                                                                                        |
| miR-665-3p | GO:0006650 | glycerophospholipid metabolic process                         | 368  | 10      | 1.55   | 6.47       | 2.98E-06 | 0.01751911 | 391;9110;9365;11145;55650;56261;63874;84962;114882;116986                                                                                                             |
| miR-665-3p | GO:0006644 | phospholipid metabolic process                                | 470  | 11      | 1.97   | 5.57       | 3.85E-06 | 0.01751911 | 391;9110;9365;11145;55650;56261;63874;84962;114882;116986;166929                                                                                                      |
| miR-665-3p | GO:0044255 | cellular lipid metabolic process                              | 1065 | 16      | 4.47   | 3.58       | 6.48E-06 | 0.01962179 | 391;2717;5194;9110;9365;11145;26027;26063;55650;56261;63874;64834;84962;114882;116986;166929                                                                          |
| miR-665-3p | GO:0046486 | glycerolipid metabolic process                                | 456  | 10      | 1.92   | 5.22       | 1.95E-05 | 0.04424721 | 391;9110;9365;11145;55650;56261;63874;84962;114882;116986                                                                                                             |
| miR-137-3p | GO:0007628 | adult walking behavior                                        | 29   | 4       | 0.11   | 34.30      | 5.25E-06 | 0.03145353 | 2043;2743;6323;55074                                                                                                                                                  |
| miR-137-3p | GO:0090659 | walking behavior                                              | 31   | 4       | 0.12   | 32.09      | 6.92E-06 | 0.03145353 | 2043;2743;6323;55074                                                                                                                                                  |

**Table S10.** Statistical details of experiments shown in Fig. 1, S1 and S2.

| <b>Table S10. Extreme subpopulations of addicted and non-addicted mice were obtained from mice trained with chocolate-flavored pellets (Fig. 1, S1 and S2).</b> |                                  |                                                                                                                                                                                                                                              |                                                                                                                              |                                                                    |
|-----------------------------------------------------------------------------------------------------------------------------------------------------------------|----------------------------------|----------------------------------------------------------------------------------------------------------------------------------------------------------------------------------------------------------------------------------------------|------------------------------------------------------------------------------------------------------------------------------|--------------------------------------------------------------------|
| <b>Figure number</b>                                                                                                                                            | <b>Statistical analysis</b>      | <b>Factor name</b>                                                                                                                                                                                                                           | <b>Statistic value</b>                                                                                                       | <b>P-value</b>                                                     |
| Fig. 1B                                                                                                                                                         | Repeated measures ANOVA          | FR1 (Sessions 1-6)<br>Group<br>Session<br>Group x Session                                                                                                                                                                                    | $F(1, 336) = 0.56$<br>$F(5, 336) = 7.63$<br>$F(5, 336) = 0.006$                                                              | n.s.<br>p<0.001<br>n.s.                                            |
|                                                                                                                                                                 | Repeated measures ANOVA          | FR5 (Sessions 1-92)<br>Group<br>Session<br>Group x Session                                                                                                                                                                                   | $F(1, 5152) = 812.5$<br>$F(91, 5152) = 2.81$<br>$F(91, 5152) = 0.83$                                                         | p<0.0001<br>p<0.0001<br>n.s.                                       |
| Fig. 1 C-E                                                                                                                                                      | U Mann-Whitney                   | Standard vs Chocolate<br>Persistence<br>Motivation<br>Compulsive-like behavior                                                                                                                                                               | $U = 96.50$<br>$U = 47$<br>$U = 137.5$                                                                                       | p<0.05<br>p<0.001<br>n.s.                                          |
| Fig. 1F                                                                                                                                                         | Chi-square                       | Standard Chow vs Chocolate                                                                                                                                                                                                                   | $\chi^2 = 212.993$                                                                                                           | p<0.001                                                            |
| Fig. 1G-J                                                                                                                                                       | Kolmogorov-Smirnov               | Addict vs non-addict<br>Addict<br>Impulsivity<br>Cognitive flexibility<br>Appetitive cue reactivity<br>Aversive cue reactivity<br>Non-addict<br>Impulsivity<br>Cognitive flexibility<br>Appetitive cue reactivity<br>Aversive cue reactivity | $K-S = 0.15$<br>$K-S = 0.22$<br>$K-S = 0.19$<br>$K-S = 0.22$<br>$K-S = 0.10$<br>$K-S = 0.28$<br>$K-S = 0.22$<br>$K-S = 0.09$ | n.s.<br>n.s.<br>n.s.<br>n.s.<br>n.s.<br>p<0.001<br>p<0.001<br>n.s. |
|                                                                                                                                                                 | U Mann-Whitney or t-test         | Addict vs non-addict<br>Impulsivity<br>Cognitive flexibility<br>Appetitive cue reactivity<br>Aversive cue reactivity                                                                                                                         | $t = 4.93$<br>$U = 191.5$<br>$U = 139$<br>$t = 2.23$                                                                         | p<0.001<br>n.s.<br>p<0.05<br>p<0.05                                |
| Fig. 1K-L                                                                                                                                                       | Kolmogorov-Smirnov               | Addict vs non-addict<br>Total pellet intake non-addict<br>Total pellet intake addict<br>Body weight non-addict<br>Body weight addict                                                                                                         | $K-S = 0.08$<br>$K-S = 0.20$<br>$K-S = 0.10$<br>$K-S = 0.12$                                                                 | n.s.<br>n.s.<br>n.s.<br>n.s.                                       |
|                                                                                                                                                                 | t-test (equal variances assumed) | Total pellet intake<br>Body weight                                                                                                                                                                                                           | $t = 0.06$<br>$t = 0.05$                                                                                                     | n.s.<br>n.s.                                                       |
| Fig. S1 C-H                                                                                                                                                     | U Mann-Whitney                   | Standard vs chocolate<br>Early period<br>Persistence of response<br>Motivation<br>Compulsive-like behavior<br>Medium period<br>Persistence of response<br>Motivation<br>Compulsive-like behavior                                             | $t = 2.36$<br>$U = 117.5$<br>$U = 172$<br>$U = 129$<br>$U = 72$<br>$U = 156$                                                 | p<0.05<br>n.s.<br>n.s.<br>n.s.<br>p<0.01<br>n.s.                   |
| Fig. S1 I-K                                                                                                                                                     | Pearson correlation              | Persistence and addiction criteria<br>Motivation and addiction criteria<br>Compulsive-like behavior and addiction criteria                                                                                                                   | $r = 0.62$<br>$r = 0.64$<br>$r = 0.45$                                                                                       | p<0.001<br>p<0.001<br>p<0.001                                      |
| Fig. S1 L-S                                                                                                                                                     | U Mann-Whitney or t-test         | Addict vs non-addict<br>Persistence of response<br>Motivation<br>Compulsive-like behavior<br>Pellet intake<br>Body weight<br>Impulsivity                                                                                                     | $U = 17$<br>$t = 7$<br>$U = 4.52$<br>$t = 1.63$<br>$t = 0.75$<br>$t = 5.01$                                                  | p<0.001<br>p<0.001<br>p<0.001<br>n.s.<br>n.s.<br>p<0.001           |

|                |                             |                                                                                                                                                                                                                                                          |                                                                                                                                                                                                                                                                        |                                                                                                                    |
|----------------|-----------------------------|----------------------------------------------------------------------------------------------------------------------------------------------------------------------------------------------------------------------------------------------------------|------------------------------------------------------------------------------------------------------------------------------------------------------------------------------------------------------------------------------------------------------------------------|--------------------------------------------------------------------------------------------------------------------|
|                |                             | Cognitive flexibility<br>Appetitive cue reactivity<br>Aversive cue reactivity                                                                                                                                                                            | $t= 4.73$<br>$t= 2.43$<br>$U= 3.79$                                                                                                                                                                                                                                    | $p<0.001$<br>$p<0.05$<br>$p<0.01$                                                                                  |
| Fig. S2<br>A-B | Repeated measures<br>ANOVA  | Appetitive cue reactivity and addiction<br>criteria<br>Group<br>Session<br>Group x Session<br>Aversive cue reactivity and addiction<br>criteria<br>Group<br>Session<br>Group x Session                                                                   | $F(1, 294)= 10.83$<br>$F(5, 294)= 5.29$<br>$F(5, 294)= 2.85$<br><br>$F(1, 142)= 6.38$<br>$F(5, 142)= 172.5$<br>$F(5, 142)= 1.48$                                                                                                                                       | $p<0.01$<br>$p<0.001$<br>$p<0.05$<br><br>$p<0.05$<br>$p<0.001$<br>n.s.                                             |
| Fig. S2<br>C-F | Pearson correlation         | Impulsivity and addiction criteria<br>Cognitive flexibility and addiction criteria<br>Appetitive cue reactivity g and addiction<br>criteria<br>Aversive cue reactivity and addiction<br>criteria                                                         | $r= 0.50$<br>$r= 0.44$<br>$r= 0.28$<br><br>$r= 0.33$                                                                                                                                                                                                                   | $p<0.001$<br>$p<0.01$<br>$p<0.05$<br><br>$p<0.05$                                                                  |
| Fig. S2<br>G-J | Repeated measures<br>ANOVA  | Impulsivity<br>Group<br>Session<br>Group x Session<br>Cognitive flexibility<br>Group<br>Session<br>Group x Session<br>Appetitive cue reactivity<br>Group<br>Session<br>Group x Session<br>Aversive cue reactivity<br>Group<br>Session<br>Group x Session | $F(1, 147)= 4.76$<br>$F(2, 147)= 4.67$<br>$F(2, 147)= 3.40$<br><br>$F(1, 146)= 7.27$<br>$F(2, 146)= 0.98$<br>$F(2, 146)= 1.92$<br><br>$F(1, 147)= 12.57$<br>$F(2, 147)= 1.17$<br>$F(2, 147)= 1.33$<br><br>$F(1, 147)= 15.18$<br>$F(2, 147)= 1.66$<br>$F(2, 147)= 0.11$ | $p<0.05$<br>$p<0.05$<br>$p<0.05$<br><br>n.s.<br>n.s.<br>$p<0.001$<br><br>n.s.<br>n.s.<br>$p<0.001$<br>n.s.<br>n.s. |
| Fig. 1G-<br>J  | Kolmogorov-Smirnov          | Addict vs non-addict<br>Addict<br>Impulsivity<br>Cognitive flexibility<br>Appetitive cue reactivity<br>Aversive cue reactivity<br>Non-addict<br>Impulsivity<br>Cognitive flexibility<br>Appetitive cue reactivity<br>Aversive cue reactivity             | $K-S= 0.15$<br>$K-S= 0.22$<br>$K-S= 0.19$<br>$K-S= 0.22$<br><br>$K-S= 0.10$<br>$K-S= 0.28$<br>$K-S= 0.22$<br>$K-S= 0.09$                                                                                                                                               | n.s.<br>n.s.<br>n.s.<br>n.s.<br><br>n.s.<br>$p<0.001$<br>$p<0.001$<br>n.s.                                         |
|                | U Mann-Whitney<br>or t-test | Addict vs non-addict<br>Impulsivity<br>Cognitive flexibility<br>Appetitive cue reactivity<br>Aversive cue reactivity                                                                                                                                     | $t= 4.93$<br>$U= 191.5$<br>$U= 139$<br>$t= 2.23$                                                                                                                                                                                                                       | $p<0.001$<br>n.s.<br>$p<0.05$<br>$p<0.05$                                                                          |

**Table S11.** Statistical details of data shown in Fig. 4.

| <b>Table S11. Behavioral results of the three hallmarks of addiction in a human cohort comparing non-addicted (“NA”) and addicted (“A”) individuals (A).</b> |                             |                                                                                                                                                                                                                                                                                                                                                         |                                                                                                          |                                                |
|--------------------------------------------------------------------------------------------------------------------------------------------------------------|-----------------------------|---------------------------------------------------------------------------------------------------------------------------------------------------------------------------------------------------------------------------------------------------------------------------------------------------------------------------------------------------------|----------------------------------------------------------------------------------------------------------|------------------------------------------------|
| <b>Figure number</b>                                                                                                                                         | <b>Statistical analysis</b> | <b>Factor name</b>                                                                                                                                                                                                                                                                                                                                      | <b>Statistic value</b>                                                                                   | <b>P-value</b>                                 |
| Fig. 4A-C                                                                                                                                                    | Kolmogorov-Smirnov          | Men non-addict<br>Persistence<br>Motivation<br>Compulsive-like behavior                                                                                                                                                                                                                                                                                 | <i>K-S= 0.21</i><br><i>K-S= 0.21</i><br><i>K-S= 0.53</i>                                                 | n.s.<br>n.s.<br>p<0.001                        |
|                                                                                                                                                              |                             | Men addict<br>Persistence<br>Motivation<br>Compulsive-like behavior                                                                                                                                                                                                                                                                                     | <i>N too small</i><br><i>N too small</i><br><i>N too small</i>                                           |                                                |
| Fig. 4A-C                                                                                                                                                    | U Mann-Whitney              | Women non-addict<br>Persistence<br>Motivation<br>Compulsive-like behavior                                                                                                                                                                                                                                                                               | <i>K-S= 0.24</i><br><i>K-S= 0.26</i><br><i>K-S= 0.49</i>                                                 | p<0.001<br>p<0.001<br>p<0.001                  |
|                                                                                                                                                              |                             | Women addict<br>Persistence<br>Motivation<br>Compulsive-like behavior                                                                                                                                                                                                                                                                                   | <i>K-S= 0.13</i><br><i>K-S= 0.16</i><br><i>K-S= 0.21</i>                                                 | n.s.<br>n.s.<br>n.s.                           |
| Fig. 4D-F                                                                                                                                                    | Pearson correlation         | Men addict vs non-addict<br>Persistence<br>Motivation<br>Compulsive-like behavior                                                                                                                                                                                                                                                                       | <i>U= 3</i><br><i>U= 12.5</i><br><i>U= 1</i>                                                             | p<0.05<br>n.s.<br>p<0.01                       |
|                                                                                                                                                              |                             | Women addict vs non-addict<br>Persistence<br>Motivation<br>Compulsive-like behavior                                                                                                                                                                                                                                                                     | <i>U= 18.5</i><br><i>U= 36</i><br><i>U= 22</i>                                                           | p<0.001<br>p<0.001<br>p<0.001                  |
| Fig. 4G-L                                                                                                                                                    | Spearman correlation        | Men<br>Persistence of response YFAS 2.0 score vs circulating miR-29c-3p<br>Motivation YFAS 2.0 score vs circulating miR-665-3p<br>Compulsive-like behavior YFAS 2.0 score vs circulating miR-29c-3p                                                                                                                                                     | <i>r= -0.60</i><br><i>r= -0.60</i><br><i>r= -0.59</i>                                                    | p<0.05<br>p<0.05<br>p<0.05                     |
|                                                                                                                                                              |                             | Women<br>Persistence of response YFAS 2.0 score vs circulating miR-29c-3p<br>Motivation YFAS 2.0 score vs circulating miR-665-3p<br>Compulsive-like behavior YFAS 2.0 score vs circulating miR-29c-3p<br>YFAS 2.0 score vs circulating miR-29c-3p<br>Sensitivity to reward vs circulating miR-29c-3p<br>Sensitivity to reward vs circulating miR-192-5p | <i>r= -0.63</i><br><i>r= -0.68</i><br><i>r= -0.23</i>                                                    | p<0.05<br>p<0.01<br>n.s.                       |
| Fig. 4G-L                                                                                                                                                    | Spearman correlation        | Men<br>Persistence of response YFAS 2.0 score vs circulating miR-29c-3p<br>Motivation YFAS 2.0 score vs circulating miR-665-3p<br>Compulsive-like behavior YFAS 2.0 score vs circulating miR-29c-3p<br>YFAS 2.0 score vs circulating miR-29c-3p<br>Sensitivity to reward vs circulating miR-29c-3p<br>Sensitivity to reward vs circulating miR-192-5p   | <i>r= 0.06</i><br><i>r= 0.09</i><br><i>r= 0.08</i><br><i>r= 0.08</i><br><i>r= 0.18</i><br><i>r= 0.44</i> | n.s.<br>n.s.<br>n.s.<br>n.s.<br>n.s.<br>p<0.05 |
|                                                                                                                                                              |                             | Women<br>Persistence of response YFAS 2.0 score vs circulating miR-29c-3p<br>Motivation YFAS 2.0 score vs circulating miR-665-3p<br>Compulsive-like behavior YFAS 2.0 score vs circulating miR-29c-3p<br>YFAS 2.0 score vs circulating miR-29c-3p<br>Sensitivity to reward vs circulating miR-29c-3p<br>Sensitivity to reward vs circulating miR-192-5p | <i>r= 0.06</i><br><i>r= 0.09</i><br><i>r= 0.08</i><br><i>r= 0.08</i><br><i>r= 0.18</i><br><i>r= 0.44</i> | n.s.<br>n.s.<br>n.s.<br>n.s.<br>n.s.<br>p<0.05 |

**Table S12.** Statistical details of experiments shown in Fig. 5 and Fig. S5.

| <b>Table S12. Addiction Criteria, Percentages of addicted animals and phenotypic traits of AAV-anti miR-29c TuD mice.</b> |                                                    |                                                                                                                                                                                                                                                                                      |                                                                                              |                                                              |
|---------------------------------------------------------------------------------------------------------------------------|----------------------------------------------------|--------------------------------------------------------------------------------------------------------------------------------------------------------------------------------------------------------------------------------------------------------------------------------------|----------------------------------------------------------------------------------------------|--------------------------------------------------------------|
| <b>Figure number</b>                                                                                                      | <b>Statistical analysis</b>                        | <b>Factor name</b>                                                                                                                                                                                                                                                                   | <b>Statistic value</b>                                                                       | <b>P-value</b>                                               |
| Fig. 5D                                                                                                                   | Repeated measures ANOVA                            | FR1 (Sessions 1-2)<br>Treatment<br>Session<br>Treatment x Session                                                                                                                                                                                                                    | $F(1, 29) = 0.26$<br>$F(1, 29) = 9.63$<br>$F(1, 29) = 1.7$                                   | n.s.<br>$p < 0.01$<br>n.s.                                   |
|                                                                                                                           |                                                    | FR5 (Sessions 3-29)<br>Treatment<br>Session<br>Treatment x Session                                                                                                                                                                                                                   | $F(1, 29) = 0.05$<br>$F(26, 754) = 27.85$<br>$F(26, 754) = 0.52$                             | n.s.<br>$p < 0.0001$<br>n.s.                                 |
| Fig. 5 E-G                                                                                                                | Kolmogorov-Smirnov                                 | AAV-control TuD<br>Persistence<br>Motivation<br>Compulsive-like behavior<br>AAV-anti miR-29c-3p TuD<br>Persistence<br>Motivation<br>Compulsive-like behavior                                                                                                                         | $K-S = 0.18$<br>$K-S = 0.17$<br>$K-S = 0.19$<br>$K-S = 0.18$<br>$K-S = 0.22$<br>$K-S = 0.13$ | n.s.<br>n.s.<br>n.s.<br>n.s.<br>n.s.<br>n.s.                 |
|                                                                                                                           | t-test (equal variances not assumed)               | Persistence                                                                                                                                                                                                                                                                          | $t = -2.68$                                                                                  | $p < 0.05$                                                   |
|                                                                                                                           | t-test (equal variances assumed)                   | Motivation<br>Compulsive-like behavior                                                                                                                                                                                                                                               | $t = -1.27$<br>$t = 0.18$                                                                    | n.s.<br>n.s.                                                 |
| Fig. 5H                                                                                                                   | Chi square                                         | Treatment                                                                                                                                                                                                                                                                            | $\chi^2 = 10.56$                                                                             | $p < 0.001$                                                  |
| Fig. 5I-K                                                                                                                 | Pearson correlation                                | AAV-control TuD<br>Persistence and addiction criteria<br>Motivation and addiction criteria<br>Compulsive-like behavior and addiction criteria                                                                                                                                        | $r = 0.52$<br>$r = 0.59$<br>$r = 0.56$                                                       | $p < 0.05$<br>$p < 0.01$<br>$p < 0.05$                       |
|                                                                                                                           | Pearson correlation                                | AAV-anti miR-29c-3p TuD<br>Persistence and addiction criteria<br>Motivation and addiction criteria<br>Compulsive-like behavior and addiction criteria                                                                                                                                | $r = 0.73$<br>$r = 0.72$<br>$r = 0.60$                                                       | $p < 0.01$<br>$p < 0.01$<br>$p < 0.05$                       |
| Fig. 5L-M                                                                                                                 | Kolmogorov-Smirnov                                 | AAV-anti miR-29c-3p TuD<br>Total pellet intake Control<br>Total pellet intake AAV-anti miR-29c-3p TuD<br>Body weigh Control<br>Body weigh AAV-anti miR-29c-3p TuD                                                                                                                    | $K-S = 0.10$<br>$K-S = 0.23$<br>$K-S = 0.14$<br>$K-S = 0.31$                                 | n.s.<br>n.s.<br>n.s.<br>$p < 0.01$                           |
|                                                                                                                           | t-test (equal variances assumed)<br>U Mann-Whitney | Total pellet intake<br>Body weight                                                                                                                                                                                                                                                   | $t = 0.38$<br>$U = 85$                                                                       | n.s.<br>n.s.                                                 |
| Fig. S5A                                                                                                                  | Kolmogorov-Smirnov                                 | AAV-control TuD<br>Impulsivity<br>AAV-anti miR-29c-3p TuD<br>Impulsivity                                                                                                                                                                                                             | $K-S = 0.15$<br>$K-S = 0.14$                                                                 | n.s.<br>n.s.                                                 |
|                                                                                                                           | t-test (equal variances assumed)                   | Impulsivity                                                                                                                                                                                                                                                                          | $t = -1.09$                                                                                  | n.s.                                                         |
| Fig. S5B                                                                                                                  | U Mann-Whitney                                     | AAV-control TuD NA vs. A<br>Basal Active<br>Basal Inactive<br>Reversal Active (before inactive)<br>Reversal Inactive (before active)<br>AAV-anti miR-29c-3p TuD NA vs. A<br>Basal Active<br>Basal Inactive<br>Reversal Active (before inactive)<br>Reversal Inactive (before active) | $U = 17$<br>$U = 10$<br>$U = 10$<br>$U = 10$<br>$U = 8$<br>$U = 17$<br>$U = 8$<br>$U = 9$    | n.s.<br>n.s.<br>n.s.<br>n.s.<br>n.s.<br>n.s.<br>n.s.<br>n.s. |
| Fig. S5C-D                                                                                                                | Kolmogorov-Smirnov                                 | AAV-control TuD<br>Appetitive cue reactivity<br>Aversive cue reactivity<br>AAV-anti miR-29c-3p TuD                                                                                                                                                                                   | $K-S = 0.16$<br>$K-S = 0.11$                                                                 | n.s.<br>n.s.                                                 |

|            |                                      |                                                                                                                                                                                                                     |                                                  |                                      |
|------------|--------------------------------------|---------------------------------------------------------------------------------------------------------------------------------------------------------------------------------------------------------------------|--------------------------------------------------|--------------------------------------|
|            |                                      | Appetitive cue reactivity<br>Aversive cue reactivity                                                                                                                                                                | $K-S= 0.17$<br>$K-S= 0.15$                       | n.s.<br>n.s.                         |
|            | t-test (equal variances not assumed) | Appetitive cue reactivity                                                                                                                                                                                           | $t= -1.41$                                       | n.s.                                 |
|            | t-test (equal variances assumed)     | Aversive cue reactivity                                                                                                                                                                                             | $t= -1.14$                                       | n.s.                                 |
| Fig. S5E-H | Pearson correlation                  | AAV-control TuD<br>Impulsivity and addiction criteria<br>Cognitive flexibility and addiction criteria<br>Appetitive cue reactivity and addiction criteria<br>Aversive cue reactivity and addiction criteria         | $r= 0.52$<br>$r= 0.58$<br>$r= 0.21$<br>$r= 0.25$ | $p<0.05$<br>$p<0.01$<br>n.s.<br>n.s. |
|            | Pearson correlation                  | AAV-anti miR-29c-3p TuD<br>Impulsivity and addiction criteria<br>Cognitive flexibility and addiction criteria<br>Appetitive cue reactivity and addiction criteria<br>Aversive cue reactivity and addiction criteria | $r= 0.12$<br>$r= 0.44$<br>$r= 0.26$<br>$r= 0.07$ | n.s.<br>n.s.<br>n.s.<br>n.s.         |
| Fig. S5I-L | U Mann-Whitney                       | AAV-control TuD NA vs A<br>Impulsivity<br>Persistence<br>Motivation<br>Compulsive-like behavior                                                                                                                     | $U= 11$<br>$U= 2$<br>$U= 9.5$<br>$U= 12.5$       | n.s.<br>$p<0.01$<br>n.s.<br>n.s.     |
|            |                                      | AAV-anti miR-29c-3p TuD NA vs A<br>Impulsivity<br>Persistence<br>Motivation<br>Compulsive-like behavior                                                                                                             | $U= 12$<br>$U= 3$<br>$U= 9$<br>$U= 10$           | n.s.<br>$p<0.01$<br>n.s.<br>n.s.     |

**Table S13.** Statistical details of experiments shown in Fig. 6, Fig. S4 and Fig. S6.

| <b>Table S13. Addiction Criteria, Percentages of addicted animals and phenotypic traits of AAV-anti miR-665-3p TuD mice.</b> |                                      |                                                                                                                                                                    |                                                                                        |                                                              |
|------------------------------------------------------------------------------------------------------------------------------|--------------------------------------|--------------------------------------------------------------------------------------------------------------------------------------------------------------------|----------------------------------------------------------------------------------------|--------------------------------------------------------------|
| <b>Figure number</b>                                                                                                         | <b>Statistical analysis</b>          | <b>Factor name</b>                                                                                                                                                 | <b>Statistic value</b>                                                                 | <b>P-value</b>                                               |
| Fig. 6B                                                                                                                      | Repeated measures ANOVA              | FR1 (Sessions 1-2)<br>Treatment<br>Session<br>Treatment x Session                                                                                                  | $F(1, 35)= 0.65$<br>$F(1, 35)= 30.46$<br>$F(1, 35)= 0.01$                              | n.s.<br>$p<0.0001$<br>n.s.                                   |
|                                                                                                                              |                                      | FR5 (Sessions 3-29)<br>Treatment<br>Session<br>Treatment x Session                                                                                                 | $F(1, 35)= 0.09$<br>$F(26, 910)= 23.5$<br>$F(26, 910)= 0.49$                           | n.s.<br>$p<0.0001$<br>n.s.                                   |
| Fig. 6C-E                                                                                                                    | Kolmogorov-Smirnov                   | AAV-control TuD<br>Persistence<br>Motivation<br>Compulsive-like behavior<br>AAV-anti miR-6653p TuD<br>Persistence<br>Motivation<br>Compulsive-like behavior        | $K-S= 0.24$<br>$K-S= 0.21$<br>$K-S= 0.17$<br>$K-S= 0.25$<br>$K-S= 0.21$<br>$K-S= 0.17$ | $p<0.01$<br>$p<0.05$<br>n.s.<br>$p<0.01$<br>$p<0.05$<br>n.s. |
|                                                                                                                              | U Mann-Whitney                       | Persistence<br>Motivation                                                                                                                                          | $U= 142.5$<br>$U= 162$                                                                 | n.s.<br>n.s.                                                 |
|                                                                                                                              | t-test (equal variances not assumed) | Compulsive-like behavior                                                                                                                                           | $t= -2.46$                                                                             | $p<0.05$                                                     |
| Fig. 6F                                                                                                                      | Chi square                           | Treatment                                                                                                                                                          | $\chi^2= 5.57$                                                                         | $p<0.05$                                                     |
| Fig. 6G-I                                                                                                                    | Pearson correlation                  | AAV-control TuD<br>Persistence and addiction criteria<br>Motivation and addiction criteria<br>Compulsive-like behavior and addiction criteria                      | $r= 0.62$<br>$r= 0.72$<br>$r= 0.37$                                                    | $p<0.01$<br>$p<0.001$<br>n.s.                                |
|                                                                                                                              | Pearson correlation                  | AAV-anti miR-665-3p TuD<br>Persistence and addiction criteria<br>Motivation and addiction criteria<br>Compulsive-like behavior and addiction criteria              | $r= 0.77$<br>$r= 0.71$<br>$r= 0.63$                                                    | $p<0.001$<br>$p<0.001$<br>$p<0.01$                           |
| Fig. 6J-K                                                                                                                    | Kolmogorov-Smirnov                   | AAV-anti miR-665c-3p TuD<br>Total pellet intake Control<br>Total pellet intake AAV-anti miR-665-3p TuD<br>Body weigh Control<br>Body weigh AAV-anti miR-665-3p TuD | $K-S= 0.13$<br>$K-S= 0.18$<br>$K-S= 0.17$<br>$K-S= 0.19$                               | n.s.<br>n.s.<br>n.s.<br>n.s.                                 |
|                                                                                                                              | t-test (equal variances assumed)     | Total pellet intake<br>Body weight                                                                                                                                 | $t= 0.71$<br>$t= 0.097$                                                                | n.s.<br>n.s.                                                 |
| Fig. S4                                                                                                                      | Kolmogorov-Smirnov                   | Ncam1<br>AAV-control TuD<br>non-addict<br>Addict<br>AAV-anti-miR-665-3p TuD<br>non-addict<br>Addict                                                                | $K-S= 0.15$<br>N too small<br>$K-S= 0.21$<br>$K-S= 0.29$                               | n.s.<br>n.s.<br>n.s.                                         |
|                                                                                                                              |                                      | Rbfox1<br>AAV-control TuD<br>non-addict<br>Addict<br>AAV-anti-miR-665-3p TuD<br>non-addict<br>Addict                                                               | $K-S= 0.23$<br>N too small<br>$K-S= 0.10$<br>$K-S= 0.21$                               | $p<0.05$<br>n.s.<br>n.s.                                     |
|                                                                                                                              |                                      | Ncam1<br>AAV-control TuD<br>non-addict vs addict                                                                                                                   | $U= 0.15$                                                                              | $p<0.05$                                                     |
|                                                                                                                              |                                      | AAV-anti-miR-665-3p TuD<br>non-addict vs Addict<br>AAV-control TuD vs AAV-anti-miR-665-3p TuD                                                                      | $t= 2.14$<br>$U= 19$                                                                   | $p<0.001$<br>$p<0.001$                                       |

|            |                                  |                                                                                                                                                                                                                     |                                                                  |                                              |
|------------|----------------------------------|---------------------------------------------------------------------------------------------------------------------------------------------------------------------------------------------------------------------|------------------------------------------------------------------|----------------------------------------------|
|            | U Mann-Whitney or t-test         | Rbfox1<br>AAV-control TuD<br>non-addict vs Addict<br><br>AAV-anti-miR-665-3p TuD<br>non-addict vs Addict<br>AAV-control TuD vs AAV-anti-miR-665-3p TuD                                                              | $U = 19.50$<br><br>$t = 2.60$<br>$U = 19.50$                     | n.s.<br><br>$p < 0.05$<br>$p < 0.001$        |
| Fig. S6A   | Kolmogorov-Smirnov               | AAV-control TuD<br>Impulsivity<br>AAV-anti miR-665-3p TuD<br>Impulsivity                                                                                                                                            | $K-S = 0.23$<br><br>$K-S = 0.15$                                 | $p < 0.05$<br><br>n.s.                       |
|            | U Mann-Whitney                   | Impulsivity                                                                                                                                                                                                         | $U = 141$                                                        | n.s.                                         |
| Fig. S6B   | U Mann-Whitney                   | AAV-control TuD NA vs. A<br>Basal Active<br>Basal Inactive<br>Reversal Active (before inactive)<br>Reversal Inactive (before active)                                                                                | $U = 7$<br>$U = 18.5$<br>$U = 14$<br>$U = 3$                     | n.s.<br>n.s.<br>n.s.<br>$p < 0.05$           |
|            |                                  | AAV-anti miR-665-3p TuD NA vs. A<br>Basal Active<br>Basal Inactive<br>Reversal Active (before inactive)<br>Reversal Inactive (before active)                                                                        | $U = 23$<br>$U = 31$<br>$U = 29$<br>$U = 24$                     | $p < 0.05$<br>n.s.<br>n.s.<br>n.s.           |
| Fig. S6C-D | Kolmogorov-Smirnov               | AAV-control TuD<br>Appetitive cue reactivity<br>Aversive cue reactivity<br>AAV-anti miR-665-3p TuD<br>Appetitive cue reactivity<br>Aversive cue reactivity                                                          | $K-S = 0.16$<br>$K-S = 0.13$<br><br>$K-S = 0.16$<br>$K-S = 0.20$ | n.s.<br>n.s.<br><br>n.s.<br>n.s.             |
|            | t-test (equal variances assumed) | Appetitive cue reactivity<br>Aversive cue reactivity                                                                                                                                                                | $t = -0.28$<br>$t = -0.67$                                       | n.s.<br>n.s.                                 |
| Fig. S6E-H | Pearson correlation              | AAV-control TuD<br>Impulsivity and addiction criteria<br>Cognitive flexibility and addiction criteria<br>Appetitive cue reactivity and addiction criteria<br>Aversive cue reactivity and addiction criteria         | $r = 0.33$<br>$r = 0.73$<br>$r = 0.60$<br><br>$r = 0.24$         | n.s.<br>n.s.<br>n.s.<br><br>n.s.             |
|            | Pearson correlation              | AAV-anti miR-665-3p TuD<br>Impulsivity and addiction criteria<br>Cognitive flexibility and addiction criteria<br>Appetitive cue reactivity and addiction criteria<br>Aversive cue reactivity and addiction criteria | $r = 0.42$<br>$r = 0.55$<br>$r = 0.34$<br><br>$r = 0.68$         | n.s.<br>$p < 0.05$<br>n.s.<br><br>$p < 0.01$ |
| Fig. S7I-L | U Mann-Whitney                   | AAV-control TuD NA vs A<br>Impulsivity<br>Persistence<br>Motivation<br>Compulsive-like behavior                                                                                                                     | $U = 8$<br>$U = 6$<br>$U = 2.5$<br>$U = 15$                      | n.s.<br>n.s.<br>$p < 0.01$<br>n.s.           |
|            |                                  | AAV-anti miR-665-3p TuD NA vs A<br>Impulsivity<br>Persistence<br>Motivation<br>Compulsive-like behavior                                                                                                             | $U = 21$<br>$U = 1$<br>$U = 9.5$<br>$U = 19.5$                   | n.s.<br>$p < 0.001$<br>$p < 0.01$<br>n.s.    |



**Table S14.** Statistical details of experiments shown in Fig. 7 and Fig. S7.

| <b>Table S14. Addiction Criteria, Percentages of addicted animals and phenotypic traits of AAV-anti miR-137-3p TuD mice.</b> |                                  |                                                                                                                                                       |                                                                  |                                           |
|------------------------------------------------------------------------------------------------------------------------------|----------------------------------|-------------------------------------------------------------------------------------------------------------------------------------------------------|------------------------------------------------------------------|-------------------------------------------|
| <b>Figure number</b>                                                                                                         | <b>Statistical analysis</b>      | <b>Factor name</b>                                                                                                                                    | <b>Statistic value</b>                                           | <b>P-value</b>                            |
| Fig. 7B                                                                                                                      | Repeated measures ANOVA          | FR1 (Sessions 1-2)<br>Treatment<br>Session<br>Treatment x Session                                                                                     | $F(1, 31) = 0.36$<br>$F(1, 31) = 13.52$<br>$F(1, 31) = 0.91$     | n.s.<br>$p < 0.001$<br>n.s.               |
|                                                                                                                              |                                  | FR5 (Sessions 3-29)<br>Treatment<br>Session<br>Treatment x Session                                                                                    | $F(1, 31) = 1.91$<br>$F(26, 806) = 26.23$<br>$F(26, 806) = 1.11$ | n.s.<br>$p < 0.0001$<br>n.s.              |
| Fig. 7C-E                                                                                                                    | Kolmogorov-Smirnov               | AAV-control TuD<br>Persistence<br>Motivation<br>Compulsive-like behavior                                                                              | $K-S = 0.19$<br>$K-S = 0.22$<br>$K-S = 0.17$                     | n.s.<br>$p < 0.05$<br>n.s.                |
|                                                                                                                              |                                  | AAV-anti miR-137-3p TuD<br>Persistence<br>Motivation<br>Compulsive-like behavior                                                                      | $K-S = 0.11$<br>$K-S = 0.33$<br>$K-S = 0.16$                     | n.s.<br>$p < 0.001$<br>n.s.               |
|                                                                                                                              | t-test (equal variances assumed) | Persistence                                                                                                                                           | $t = -0.94$                                                      | n.s.                                      |
|                                                                                                                              | U Mann-Whitney                   | Motivation                                                                                                                                            | $U = 129.5$                                                      | n.s.                                      |
|                                                                                                                              | t-test (equal variances assumed) | Compulsive-like behavior                                                                                                                              | $t = -0.40$                                                      | n.s.                                      |
| Fig. 7F                                                                                                                      | Chi square                       | Treatment                                                                                                                                             | $\chi^2 = 0.26$                                                  | n.s.                                      |
| Fig. 7G-I                                                                                                                    | Pearson correlation              | AAV-control TuD<br>Persistence and addiction criteria<br>Motivation and addiction criteria<br>Compulsive-like behavior and addiction criteria         | $r = 0.64$<br>$r = 0.78$<br>$r = 0.83$                           | $p < 0.01$<br>$p < 0.001$<br>$p < 0.0001$ |
|                                                                                                                              | Pearson correlation              | AAV-anti miR-137-3p TuD<br>Persistence and addiction criteria<br>Motivation and addiction criteria<br>Compulsive-like behavior and addiction criteria | $r = 0.82$<br>$r = 0.62$<br>$r = 0.60$                           | $p < 0.0001$<br>$p < 0.01$<br>$p < 0.05$  |
| Fig. 7J-K                                                                                                                    | Kolmogorov-Smirnov               | AAV-anti miR-137-3p TuD<br>Total pellet intake Control<br>Total pellet intake AAV-anti miR-137-3p TuD                                                 | $K-S = 0.19$<br>$K-S = 0.13$                                     | n.s.<br>n.s.                              |
|                                                                                                                              |                                  | Body weigh Control<br>Body weigh AAV-anti miR-137-3p TuD                                                                                              | $K-S = 0.18$<br>$K-S = 0.25$                                     | n.s.<br>n.s.                              |
|                                                                                                                              | t-test (equal variances assumed) | Total pellet intake<br>Body weight                                                                                                                    | $t = 0.18$<br>$t = 1.38$                                         | n.s.<br>n.s.                              |
| Fig. S7A                                                                                                                     | Kolmogorov-Smirnov               | AAV-control TuD<br>Impulsivity                                                                                                                        | $K-S = 0.20$                                                     | n.s.                                      |
|                                                                                                                              |                                  | AAV-anti miR-137-3p TuD<br>Impulsivity                                                                                                                | $K-S = 0.33$                                                     | $p < 0.05$                                |
|                                                                                                                              | U Mann-Whitney                   | Impulsivity                                                                                                                                           | $U = 129.5$                                                      | n.s.                                      |
| Fig. S7B                                                                                                                     | U Mann-Whitney                   | AAV-control TuD NA vs. A<br>Basal Active<br>Basal Inactive<br>Reversal Active (before inactive)<br>Reversal Inactive (before active)                  | $U = 14$<br>$U = 13.5$<br>$U = 13$<br>$U = 15$                   | n.s.<br>n.s.<br>n.s.<br>n.s.              |
|                                                                                                                              |                                  | AAV-anti miR-137-3p TuD NA vs. A<br>Basal Active<br>Basal Inactive<br>Reversal Active (before inactive)<br>Reversal Inactive (before active)          | $U = 22$<br>$U = 15.5$<br>$U = 20$<br>$U = 18$                   | n.s.<br>n.s.<br>n.s.<br>n.s.              |
| Fig. S7C-D                                                                                                                   | Kolmogorov-Smirnov               | AAV-control TuD<br>Appetitive cue reactivity<br>Aversive cue reactivity                                                                               | $K-S = 0.26$<br>$K-S = 0.13$                                     | $p < 0.01$<br>n.s.                        |

|            |                                  |                                                                                                                                                                                                                     |                                                                             |                                                                          |
|------------|----------------------------------|---------------------------------------------------------------------------------------------------------------------------------------------------------------------------------------------------------------------|-----------------------------------------------------------------------------|--------------------------------------------------------------------------|
|            |                                  | AAV-anti miR-137-3p TuD<br>Appetitive cue reactivity<br>Aversive cue reactivity                                                                                                                                     | K-S= 0.11<br>K-S= 0.20                                                      | n.s.<br>n.s.                                                             |
|            | U Mann-Whitney                   | Appetitive cue reactivity                                                                                                                                                                                           | U= 117500                                                                   | n.s.                                                                     |
|            | t-test (equal variances assumed) | Aversive cue reactivity                                                                                                                                                                                             | t= -1.21                                                                    | n.s.                                                                     |
| Fig. S7E-H | Pearson correlation              | AAV-control TuD<br>Impulsivity and addiction criteria<br>Cognitive flexibility and addiction criteria<br>Appetitive cue reactivity and addiction criteria<br>Aversive cue reactivity and addiction criteria         | r= 0.45<br>r= 0.45<br>r= 0.13<br>r= 0.29                                    | n.s.<br>n.s.<br>n.s.<br>n.s.                                             |
|            | Pearson correlation              | AAV-anti miR-137-3p TuD<br>Impulsivity and addiction criteria<br>Cognitive flexibility and addiction criteria<br>Appetitive cue reactivity and addiction criteria<br>Aversive cue reactivity and addiction criteria | r= 0.37<br>r= 0.46<br>r= 0.13<br>r= 0.32                                    | n.s.<br>n.s.<br>n.s.<br>n.s.                                             |
| Fig. S7I-L | U Mann-Whitney                   | AAV-control TuD NA vs A<br>Impulsivity<br>Persistence<br>Motivation<br>Compulsive-like behavior<br>AAV-anti miR-137-3p TuD NA vs A<br>Impulsivity<br>Persistence<br>Motivation<br>Compulsive-like behavior          | U= 9<br>U= 11.5<br>U= 3.5<br>U= 1<br><br>U= 23<br>U= 2.5<br>U= 8<br>U= 17.5 | n.s.<br>n.s.<br>p<0.05<br>p<0.01<br><br>n.s.<br>p<0.01<br>p<0.05<br>n.s. |
